# Supplementary material for: 4-Hydroxy-6-alkyl-2-pyrones as nucleophilic coupling partners in Mitsunobu reactions and oxa-Michael additions
Source: publisher site journal article supplement (doi:10.3762/bjoc.10.116), 2014-05-20
Supplement: Additional file 1 [file 1860-5397-10-116-S1.pdf]

# Supporting Information

for

## 4-Hydroxy-6-alkyl-2-pyrones as nucleophilic coupling partners in Mitsunobu reactions and oxa- Michael additions

Michael J. Burns, Thomas O. Ronson, Richard J. K. Taylor and Ian J. S. Fairlamb\*

Address: Department of Chemistry, University of York, Heslington, York, YO10 5DD,  
UK

Email: Ian J. S. Fairlamb\* – [ian.fairlamb@york.ac.uk](mailto:ian.fairlamb@york.ac.uk)

\* Corresponding author

### Detailed experimental procedures, characterisation data for compounds 3b–e, 4a–l, 5d, 7a–i and 9, and <sup>1</sup>H NMR spectra for novel compounds.

|                                                                       |         |
|-----------------------------------------------------------------------|---------|
| 1. General Experimental Details.....                                  | S2      |
| 2. General Procedures.....                                            | S2      |
| 3. Optimisation table for reaction between 3a and 9.....              | S4      |
| 4. Compound Characterisation Data.....                                | S5      |
| 5. References.....                                                    | S18     |
| 6. Representative <sup>1</sup> H NMR spectra for novel compounds..... | S19-S43 |

## 1. General Experimental Details

Reagents were purchased from either Sigma Aldrich or Alfa Aesar and used as received. Dry THF was distilled over sodium wire using benzophenone indicator and stored over a potassium mirror. Triethylamine was dried over KOH. Dichloromethane was dried utilising a chromasolv<sup>®</sup> solvent column. Nitrogen gas was oxygen free and dried immediately before use by passage through sodium hydroxide pellets and silica.

<sup>1</sup>H NMR and <sup>13</sup>C NMR spectra were recorded on a Jeol ECX400 or Jeol ECS400 spectrometer operating at 400 and 100 MHz respectively, or a Bruker 500 spectrometer operating at 500 and 126 MHz respectively. <sup>19</sup>F NMR spectra were recorded on a Jeol ECX400 spectrometer at 376 MHz. <sup>31</sup>P NMR spectra were recorded on a Jeol ECX400 spectrometer at 162 MHz. Column chromatography was performed using flash silica gel with the solvent systems specified within the text. Mass spectrometry was performed on a Bruker daltronics micrOTOF spectrometer, with <5 ppm error recorded for all HRMS samples. IR was performed on a Jasco FTIR 4100 spectrometer using an ATR attachment. Melting point analyses were performed on a Stuart SMP3 melting point apparatus, using a temperature ramp of 3 °C/minute.

Compounds **5c**<sup>1</sup>, **5f**<sup>2</sup>, **5g**<sup>3</sup>, **5h**<sup>4</sup>, **5i**<sup>5</sup> and **6c**<sup>6</sup> were prepared according to literature procedures. Compound **6d** was synthesised from the appropriate acid chloride and methoxylamine hydrochloride with triethylamine according to standard procedure.

## 2. General Procedures

### General Procedure 1: Mitsunobu Reaction with 4-hydroxy-2-pyrones

To a stirred solution of the pyrone (1 eq.), triphenylphosphine (1.5 eq.) and alcohol (1.5 eq.), in dichloromethane (4 mL mmol<sup>-1</sup>) under nitrogen either at 0 °C or ambient temperature, was carefully added DIAD (1.5 eq.) over 10–30 mins (depending on scale), so as to avoid the generation of excess heat (<5 °C internal temperature increase). The solution was then stirred at RT (typically 18–25 °C) for 16 hours, and the solvent removed in vacuo. By-product phosphine oxide was removed from the crude residue by dissolving the product in ether (2 mL mmol<sup>-1</sup>), and vacuum filtration to remove the solid oxide. The ether was then removed in vacuo and the residue purified via flash column chromatography to afford the desired product.

### General Procedure 2: Oxa-Michael Addition with 4-hydroxy-2-pyrones

The 2-pyrone (1 eq.), triethylamine (1 eq.) and propiolate ester (2 eq.) were stirred in CH<sub>2</sub>Cl<sub>2</sub> (2 mL mmol<sup>-1</sup>) at 45 °C for 16 hours. The solvent was then removed *in vacuo* and the product purified *via* flash column chromatography to afford the desired product.

### General Procedure 3: Lithiation/alkylations of 4-hydroxy-6-methyl-2-pyrone

4-Hydroxy-6-methyl-2-pyrone **3a** (1 mmol, 1 eq.) was heated to 80 °C under nitrogen in HMDS (3 mL) for 1 hour. The solution was allowed to cool and the HMDS removed under vacuum. THF (3 mL) was then added and the solution cooled to -78 °C at which point *n*-BuLi (2.5 M in hexanes, 1.25 mmol, 1.25 eq.) was added carefully over 15 minutes, and the solution stirred for 1 hour. The alkyl halide (1.7–2.3 mmol, 1.7–2.3 eq.) was then added over 10 minutes and the solution allowed to warm gradually to 20 °C and stirred for 16 hours. The reaction was then quenched with 6 M aq. HCl until the pH ≈ 2 and the solvent removed *in vacuo*. The residue was taken up in ethyl acetate (5 mL), washed twice in brine, dried over MgSO<sub>4</sub>, filtered and concentrated *in vacuo* to afford a crude brown residue which was purified by flash column chromatography (3% MeOH in dichloromethane).

### 3. Optimisation table for reaction between 3a and 9

Table S1

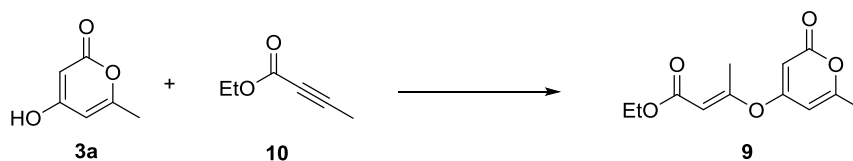

| Entry | Solvent                         | Base (eq.)            | Additive (mol%)                                 | Temp. (°C) | Time (h) | Yield <sup>a</sup> (%) |
|-------|---------------------------------|-----------------------|-------------------------------------------------|------------|----------|------------------------|
| 1     | CH <sub>2</sub> Cl <sub>2</sub> | Et <sub>3</sub> N (1) | -                                               | 40         | 1        | 0                      |
| 2     | CH <sub>2</sub> Cl <sub>2</sub> | Et <sub>3</sub> N (1) | -                                               | 80 (mw)    | 1        | ca. 1                  |
| 3     | CH <sub>2</sub> Cl <sub>2</sub> | DBU (2)               | -                                               | 90 (mw)    | 1        | 4                      |
| 4     | THF                             | DBU (1)               | BF <sub>3</sub> (20)                            | 90 (mw)    | 2        | 18 <sup>b</sup>        |
| 5     | CH <sub>2</sub> Cl <sub>2</sub> | DBU (1)               | BF <sub>3</sub> (20)                            | 80 (mw)    | 2        | 6 <sup>b</sup>         |
| 6     | THF                             | DBU (1)               | BF <sub>3</sub> (20)                            | 80 (mw)    | 2        | 24 <sup>b</sup>        |
| 7     | THF                             | Et <sub>3</sub> N (1) | BF <sub>3</sub> (20)                            | 80 (mw)    | 2        | 5 <sup>b</sup>         |
| 8     | THF                             | DBU (1)               | Yb(OTf) <sub>3</sub> (20)                       | 80 (mw)    | 2        | 13                     |
| 9     | THF                             | DBU (1)               | BF <sub>3</sub> (20)                            | 70         | 16       | 22 <sup>b</sup>        |
| 10    | THF                             | DBU (1)               | BF <sub>3</sub> (6)                             | 80 (mw)    | 2        | 19 <sup>b</sup>        |
| 11    | THF                             | DBU (1)               | B( <i>i</i> -Pr) <sub>3</sub> (20)              | 80 (mw)    | 2        | 17                     |
| 12    | CH <sub>2</sub> Cl <sub>2</sub> | Et <sub>3</sub> N (1) | CuI (10)                                        | 80 (mw)    | 1        | 29                     |
| 13    | THF                             | DBU (1)               | CuI (10)                                        | 40         | 16       | 29                     |
| 14    | THF                             | DBU (1)               | CuI (10)                                        | 80 (mw)    | 2        | 26                     |
| 15    | THF                             | DBU (0.1)             | CuI (10)                                        | 80 (mw)    | 3        | 0                      |
| 16    | THF                             | DBU (0.2)             | CuI (10)                                        | 80 (mw)    | 6        | 30                     |
| 17    | THF                             | DBU (0.66)            | CuI (10)                                        | 80 (mw)    | 0.5      | 43                     |
| 18    | THF                             | DBU (0.66)            | CuI (10)                                        | 40         | 15       | 7                      |
| 19    | THF                             | DBU (0.66)            | CuI (10)/<br>B( <i>i</i> -Pr) <sub>3</sub> (20) | 80 (mw)    | 0.5      | 9                      |
| 20    | THF                             | NaH (1)               | -                                               | 20         | 5        | 0                      |
| 21    | THF                             | NaH (1)               | -                                               | 40         | 5        | 0                      |
| 22    | THF                             | NaH (1)               | -                                               | 70         | 5        | 0                      |
| 23    | THF                             | NaH (1)               | CuI (10)                                        | 70         | 5        | 0                      |

<sup>a</sup> Yield of isolated product following column chromatography. <sup>b</sup> Extensive degradation of 3a observed.

## 4. Compound Characterisation Data

### 4-Hydroxy-6-(2-phenylethyl)-2-pyrone (3b)<sup>7</sup>

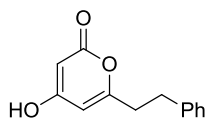

Prepared according to general procedure 3 using **3a** (126 mg, 1 mmol, 1 eq.) and benzyl bromide (373 mg, 2.3 mmol, 2.3 eq.) to afford the title compound as a yellow solid (85 mg, 40%).

**M. P.** 134–135 °C (lit. 137–138 °C); **<sup>1</sup>H-NMR** (400 MHz, CDCl<sub>3</sub>): 7.32–7.14 (m, 5H), 5.92 (d, *J* = 2.1 Hz, 1H), 5.57 (d, *J* = 2.1 Hz, 1H), 2.96 (dd, *J* = 8.8, 6.8 Hz, 2H), 2.78 (dd, *J* = 8.8, 6.8 Hz, 2H); **<sup>13</sup>C-NMR** (100 MHz, CDCl<sub>3</sub>): 172.24, 167.94, 165.87, 139.50, 128.54, 128.15, 126.43, 101.72, 89.94, 35.36, 32.70; **MS** (ESI) *m/z* (rel. %): 217 [MH<sup>+</sup>] (100); **HRMS** (ESI) calculated for C<sub>13</sub>H<sub>13</sub>O<sub>3</sub> [MH<sup>+</sup>]: 217.0859, found: 217.0865.

### 4-Hydroxy-6-(6-triisopropylsilyl-hex-5-yne)-2-pyrone (3c)

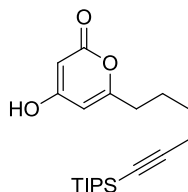

Prepared according to general procedure 3 using **3a** (126 mg, 1 mmol, 1 eq.) and 5-triisopropylsilyl-1-iodopent-4-yne<sup>8</sup> (550 mg, 1.6 mmol, 1.6 eq.) to afford the title compound as a yellow oil (239 mg, 69%).

**<sup>1</sup>H-NMR** (400 MHz, CDCl<sub>3</sub>): 5.93 (d, *J* = 2.1 Hz, 1H), 5.54 (d, *J* = 2.1 Hz, 1H), 2.47 (t, *J* = 7.5 Hz, 2H), 2.24 (t, *J* = 6.9 Hz, 2H), 1.74–1.84 (m, 2H), 1.53–1.62 (m, 2H), 0.97–1.01 (m, 21H); **<sup>13</sup>C-NMR** (100 MHz, CDCl<sub>3</sub>): 172.3, 167.9, 166.8, 107.9, 101.3, 89.9, 80.9, 53.4, 33.0, 27.9, 25.6, 18.6, 11.2; **MS** (ESI) *m/z* (rel. %): 349 [MH<sup>+</sup>] (100), 307 (8), 255 (3), 167 (4); **HRMS** (ESI) calculated for C<sub>20</sub>H<sub>33</sub>O<sub>3</sub>Si [MH<sup>+</sup>]: 349.2193, found: 349.2189; **IR** (CH<sub>2</sub>Cl<sub>2</sub>, cm<sup>-1</sup>): 3684, 2944, 2865, 2169, 1693, 1613, 1572, 1462.

### 1-Iodoct-7-en-4-yne (11)

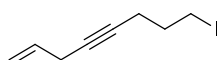

To a solution of oct-7-en-5-yn-1-ol (**5i**)<sup>5</sup> (12.4 g, 100 mmol, 1 eq.) and triethylamine (20.8 g, 150 mmol, 1.5 eq.) in dichloromethane (800 mL) under nitrogen at 20 °C, was added

methanesulfonylchloride (22.9 g, 200 mmol, 2 eq.). The reaction was quenched with ice cold water (150 mL) and separated. The organic layer was then washed with cold 2 M HCl (150 mL), sat. NaHCO<sub>3</sub> (150 mL) and brine (150 mL). The organic extracts were dried over MgSO<sub>4</sub>, filtered and concentrated *in vacuo* to afford the crude mesylate as a pale yellow oil (20.2 g, >99%) which was used without further purification.

A solution of the crude mesylate (20.2 g, 100 mmol, 1 eq.) and NaI (45 g, 300 mmol, 3 eq.) was stirred in acetone (300 mL) for 72 hours under nitrogen, and then heated to reflux for 2 hours. The solution was allowed to cool, filtered, and the filtrate concentrated *in vacuo*. The crude product was then taken up in hexane (3 × 40 mL), filtered, and reduced *in vacuo* to afford a pale yellow oil (17.4 g, 74.5%), which was used immediately without further purification.

**<sup>1</sup>H-NMR** (400 MHz, CDCl<sub>3</sub>): 5.81 (ddt, *J* = 16.9, 10.0, 5.3 Hz, 1H), 5.30 (ddt, *J* = 16.9, 1.7, 1.7 Hz, 1H), 5.10 (ddt, *J* = 10.0, 1.7, 1.7 Hz, 1H), 3.31 (t, *J* = 6.7 Hz, 2H), 2.93 (m, 2H), 2.34 (tt, *J* = 6.7, 2.4 Hz, 2H), 1.99 (p, *J* = 6.7 Hz, 2H); **<sup>13</sup>C-NMR** (100 MHz, CDCl<sub>3</sub>): 133.50, 116.15, 80.77, 78.35, 32.86, 23.49, 20.25, 5.90; **MS** (EI) *m/z* (rel.%): 234 [MH<sup>+</sup>] (33), 206 (21), 155 (10), 127 (8), 105 (9), 91 (45), 79 (100), 65 (10), 51 (25), 39 (23); **IR** (neat, cm<sup>-1</sup>): 2945, 2865, 2173, 1463, 1427, 1364, 1220, 1177.

#### 4-Hydroxy-6-(non-8-en-5-ynyl)-2-pyrone (3d)

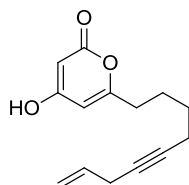

Prepared according to general procedure 3 using **3a** (126 mg, 1 mmol, 1 eq.) and 1-iodooct-7-en-4-yne **11** (330 mg, 1.4 mmol, 1.4 eq.) to afford the title compound as a yellow oil (74 mg, 32%).

**<sup>1</sup>H-NMR** (400 MHz, CDCl<sub>3</sub>): 6.00 (d, *J* = 2.1 Hz, 1H), 5.83 (ddt, *J* = 17.0, 10.0, 5.3 Hz, 1H), 5.58 (d, *J* = 2.1 Hz, 1H), 5.28 (ddt, *J* = 17.0, 1.8, 1.8 Hz, 1H), 5.08 (ddt, *J* = 10.0, 1.8, 1.8 Hz, 1H), 2.91–2.94 (m, 2H), 2.51 (t, *J* = 7.6, 2H), 2.22 (tt, *J* = 7.0, 2.4 Hz, 2H), 1.72–1.80 (m, 2H), 1.51–1.58 (m, 2H); **<sup>13</sup>C-NMR** (100 MHz, CDCl<sub>3</sub>) 172.6, 168.2, 166.9, 133.2, 133.2, 115.7, 115.7, 101.5, 89.9, 81.8, 33.2, 28.1, 25.7, 23.1, 18.4; **MS** (ESI) *m/z* (rel. %): 233 [MH<sup>+</sup>] (100), 255 [MNa<sup>+</sup>] (19); **HRMS** (ESI) calculated for C<sub>14</sub>H<sub>17</sub>O<sub>3</sub> [M<sup>+</sup>]: 233.1172, found: 233.1178; **IR** (neat, cm<sup>-1</sup>): 3083, 2939, 2619, 1694, 1568, 1492, 1445, 1364, 1250, 1142, 993.

#### 4-Hydroxy-6-(but-3-en)-2-pyrone (3e)<sup>7</sup>

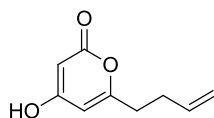

Prepared according to general procedure 2 using **3a** (126 mg, 1 mmol, 1 eq.) and allyl bromide (363 mg, 2.3 mmol, 2.3 eq.) to afford the title compound as a waxy yellow solid (88 mg, 50%).

**<sup>1</sup>H-NMR** (400 MHz, CDCl<sub>3</sub>): 6.01 (d, *J* = 1.9 Hz, 1H), 5.77 (ddt, *J* = 17.1, 10.1, 6.8 Hz, 1H), 5.58 (d, *J* = 1.9 Hz, 1H), 5.05 (ddt, *J* = 17.1, 1.5, 1.5 Hz, 1H), 5.01 (dtd, *J* = 10.1, 3.3, 1.5 Hz, 1H), 2.57 (t, *J* = 7.5 Hz, 2H), 2.35–2.41 (m, 2H); **<sup>13</sup>C-NMR** (100 MHz, CDCl<sub>3</sub>): 172.70, 168.38, 166.28, 135.94, 116.45, 101.85, 90.02, 33.04, 30.62; **MS** (ESI) *m/z* (rel.%): 167 [MH<sup>+</sup>] (100); **HRMS** (ESI) calculated for C<sub>9</sub>H<sub>11</sub>O<sub>3</sub> [MH<sup>+</sup>]: 167.0703, found: 167.0704.

#### 4-Isopropoxy-6-methyl-2-pyrone (4a)

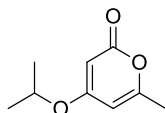

Synthesised using general procedure 1 and purified by flash column chromatography (20% EtOAc in hexanes) to afford a white crystalline solid (1.76 g, 70%)

**M. P.** 49–51 °C; **<sup>1</sup>H-NMR** (400 MHz, CDCl<sub>3</sub>): 5.71 (m, 1H), 5.35 (d, *J* = 2.2 Hz, 1H), 4.49 (sept., *J* = 6.1 Hz, 1H), 2.18 (s, 3H), 1.32 (d, *J* = 6.1 Hz, 6H); **<sup>13</sup>C-NMR** (100 MHz, CDCl<sub>3</sub>): 169.4, 165.2, 161.9, 101.0, 87.8, 71.4, 21.2, 19.7; **MS** (ESI) *m/z* (rel.%): 169 [MH<sup>+</sup>] (100). **HRMS** (ESI) calculated for C<sub>9</sub>H<sub>12</sub>O<sub>3</sub>Na [M<sup>+</sup>]: 191.0679, found: 191.0682; **IR** (CH<sub>2</sub>Cl<sub>2</sub>, cm<sup>-1</sup>): 2984, 2937, 1733, 1651, 1562, 1467, 1376, 1321.

#### 4-Prop-2-enoxy-6-methyl-2-pyrone (4b)<sup>9</sup>

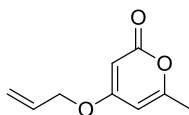

Synthesised using general procedure 1 and purified by flash column chromatography (20% EtOAc in hexane) to afford the title compound as a colourless oil (0.90 g, 54%).

**<sup>1</sup>H-NMR** (400 MHz, CDCl<sub>3</sub>): 5.94 (ddt, *J* = 17.3, 10.8, 5.5 Hz, 1H), 5.78 (dd, *J* = 2.2, 1.0 Hz, 1H), 5.38 (dq, *J* = 17.3, 1.5 Hz, 1H), 5.37 (d, *J* = 2.2 Hz, 1H), 5.32 (dq, *J* = 10.8, 1.3 Hz, 1H), 4.47 (dt, *J* = 5.5, 1.3 Hz, 2H), 2.18 (s, 3H); **<sup>13</sup>C-NMR** (100 MHz, CDCl<sub>3</sub>): 170.2, 165.0, 162.3,

130.9, 119.4, 100.6, 88.3, 69.4, 19.9; **MS** (ESI)  $m/z$  (rel. %): 189 [MNa<sup>+</sup>] (100), 167 [MH<sup>+</sup>] (45); **HRMS** (ESI) calculated for C<sub>9</sub>H<sub>10</sub>O<sub>3</sub>Na: 189.0522, found: 189.0525; **IR** (thin film, cm<sup>-1</sup>): 1708, 1649, 1561, 1449, 1410, 1319, 1246, 1182, 1142, 942, 859, 810, 684, 543.

#### 4-[1-(*tert*-Butyl-dimethyl-silyloxymethyl)-propoxy]-6-methyl-2-pyrone (4c)<sup>1</sup>

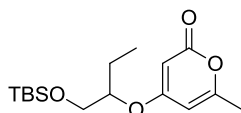

Synthesised using general procedure 1 and purified *via* flash column chromatography (20% EtOAc in hexanes) to afford a colourless oil (1.23 g, 98.4%).

$R_f$  = 0.56 (20% EtOAc); **<sup>1</sup>H-NMR** (400 MHz, CDCl<sub>3</sub>): 5.71 (dq,  $J$  = 1.9, 0.8 Hz, 1H), 5.36 (d,  $J$  = 1.9 Hz, 1H), 4.17 (p,  $J$  = 5.4 Hz, 1H), 3.66 (s, 1H), 3.64 (d,  $J$  = 1.3 Hz, 1H), 2.11–2.15 (m, 3H), 1.53–1.69 (m, 2H), 0.87 (t,  $J$  = 7.5 Hz, 3H), 0.79 (s, 9H), -0.03 (s, 3H), -0.04 (s, 3H); **<sup>13</sup>C-NMR** (100 MHz, CDCl<sub>3</sub>): 170.5, 165.3, 162.1, 100.9, 88.4, 80.9, 63.8, 25.8, 23.4, 19.8, 18.2, 9.5, -5.4; **MS** (ESI)  $m/z$  (rel.%): 335 [MNa<sup>+</sup>] (100), 313 [MH<sup>+</sup>] (2); **HRMS** (ESI) calculated for C<sub>16</sub>H<sub>28</sub>O<sub>4</sub>NaSi [M<sup>+</sup>]: 335.1649, found: 335.1640; **IR** (neat, cm<sup>-1</sup>): 2929, 2883, 2857, 1736, 1651, 1563, 1450, 1414, 1320, 1249, 1139, 1036, 1001.

#### 4-(1-Toluenesulfonyloxybutyl-2-oxy)-6-methyl-2-pyrone (4d)

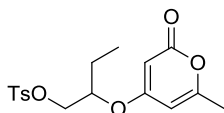

Synthesised using general procedure 1 and purified by flash column chromatography (10–40% EtOAc in heptane), to afford the title compound as a white crystalline solid (38.4 g, 99%).

**M. P.** 96–98 °C; **<sup>1</sup>H-NMR** (400 MHz, CDCl<sub>3</sub>): 7.73 (d,  $J$  = 7.5 Hz, 2H), 7.31 (d,  $J$  = 7.5 Hz, 2H), 5.67–5.64 (m, 1H), 5.22 (d,  $J$  = 2.1 Hz, 1H), 4.33–4.28 (m, 1H), 4.16–4.07 (m, 2H), 2.42 (s, 3H), 2.15 (s, 3H), 1.68 (p,  $J$  = 7.5 Hz, 2H), 0.93 (t,  $J$  = 7.5 Hz, 3H); **<sup>13</sup>C-NMR** (100 MHz, CDCl<sub>3</sub>): 169.2, 164.6, 162.4, 145.3, 130.0, 127.9, 100.5, 88.4, 68.8, 60.4, 23.1, 21.7, 19.8, 14.2, 9.0; **MS** (ESI)  $m/z$  (rel. %): 375 [MNa<sup>+</sup>] (100), 353 [MH<sup>+</sup>] (80), 281 (7), 227 (20); **HRMS** (ESI) calculated for C<sub>17</sub>H<sub>21</sub>O<sub>6</sub>S [MH<sup>+</sup>]: 353.1053, found: 353.1062; **IR** (CH<sub>2</sub>Cl<sub>2</sub>, cm<sup>-1</sup>): 3062, 2979, 2883, 1713, 1652, 1598, 1436, 1365, 1243, 1178, 1096.



#### 4-(2-Bromoethoxy)-6-methyl-2-pyrone (4e)

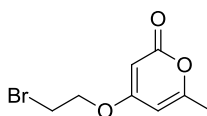

Synthesised using general procedure 1 and purified by flash column chromatography (10–40% EtOAc in heptane) to afford the title compound as a pale yellow crystalline solid (19.1 g, 82%).

**M. P.** 66–68 °C; **<sup>1</sup>H-NMR** (400 MHz, CDCl<sub>3</sub>): 5.83 (m, 1H), 5.37 (t, *J* = 2.5 Hz, 1H), 4.26 (t, *J* = 6.0 Hz, 2H), 3.61 (t, *J* = 6.0 Hz, 2H), 2.21 (s, 3H); **<sup>13</sup>C-NMR** (100 MHz, CDCl<sub>3</sub>): 169.7, 164.5, 162.5, 100.1, 88.1, 68.0, 27.1, 19.8; **MS** (ESI) *m/z* (rel. %): 235 [MH<sup>+</sup>(<sup>81</sup>Br)] (84), 233 [MH<sup>+</sup>(<sup>79</sup>Br)] (100); **HRMS** (ESI) calculated for C<sub>8</sub>H<sub>9</sub><sup>79</sup>BrO<sub>3</sub>Na: 254.9627, found: 254.9622; **IR** (CH<sub>2</sub>Cl<sub>2</sub>, cm<sup>-1</sup>): 3059, 1716, 1653, 1571, 1448, 1418, 1377, 1251, 1184, 1145.

#### 4-[1-(Diethylphosphono)-propoxy]-6-methyl-2-pyrone (4f)

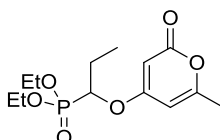

Synthesised using general procedure 1 and purified by flash column chromatography (EtOAc in hexanes) to afford the title compound as a colourless oil (91 mg, 30%).

**<sup>1</sup>H-NMR** (400 MHz, CDCl<sub>3</sub>): 5.84 (dd, *J* = 2.2, 1.0 Hz, 1H), 5.47 (d, *J* = 2.2 Hz, 1H), 4.37 (td, *J* = 8.2, 4.6 Hz, 1H), 4.21–4.08 (m, 4H), 2.20 (s, 3H), 2.07–1.84 (m, 2H), 1.32 (t, *J* = 7.0 Hz, 3H), 1.30 (t, *J* = 7.0 Hz, 3H), 1.01 (dt, *J* = 0.7, 7.4 Hz, 3H); **<sup>13</sup>C-NMR** (101 MHz, CDCl<sub>3</sub>): 170.1, 164.8, 162.7, 100.5, 89.1, 75.5 (d, <sup>1</sup>*J*<sub>C-P</sub> = 169.3 Hz), 63.3 (d, <sup>2</sup>*J*<sub>C-P</sub> = 6.9 Hz), 62.9 (d, <sup>2</sup>*J*<sub>C-P</sub> = 7.2 Hz), 23.3, 20.0, 16.6 (app. t, <sup>3</sup>*J*<sub>C-P</sub> = 5.4 Hz), 10.3 (d, <sup>2</sup>*J*<sub>C-P</sub> = 11.3); **<sup>31</sup>P-NMR** (162 MHz, CDCl<sub>3</sub>): 19.7 (s); **MS** (ESI): *m/z* (rel. %) 327 [MNa]<sup>+</sup> (100), 305 [MH]<sup>+</sup> (25); **HRMS** *m/z* [MNa]<sup>+</sup> calcd for C<sub>13</sub>H<sub>21</sub>NaO<sub>6</sub>P: 327.0968; found: 327.0970; **IR** (neat, cm<sup>-1</sup>) 1712, 1648, 1564, 1448, 1408, 1242, 1143, 1016, 963, 810, 559, 542.

#### 4-[1-(Dimethoxymethyl)-propoxy]-6-methyl-2-pyrone (4g)

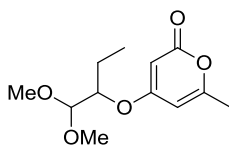

Synthesised using general procedure 1 and purified by flash column chromatography (20% EtOAc in hexanes) to afford the title compound as a colourless oil (117 mg, 23%). Due to the limited stability of the compound, only partial data could be obtained.

**<sup>1</sup>H-NMR** (500 MHz, CDCl<sub>3</sub>): 5.81 (dq, *J* = 2.3, 0.9 Hz, 1H), 5.46 (d, *J* = 2.3 Hz, 1H), 4.34 (d, *J* = 5.3 Hz, 1H), 4.20 (ddd, *J* = 7.5, 5.3, 4.3 Hz, 1H), 3.42 (s, 3H), 3.40 (s, 3H), 2.19 (d, *J* = 0.9 Hz, 3H), 1.62–1.86 (m, 2H), 0.93 (t, *J* = 7.5 Hz, 3H); **<sup>13</sup>C-NMR** (126 MHz, CDCl<sub>3</sub>): 170.3, 165.2, 162.2, 104.4, 100.7, 88.6, 79.5, 55.6, 55.5, 22.4, 19.8, 9.3.

#### 4-[1-(*tert*-Butyl-dimethyl-silyloxymethyl)-propoxy]-6-(2-phenylethyl)-2-pyrone (4h)

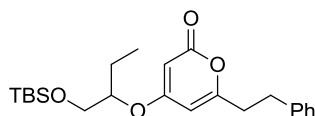

Synthesised using general procedure 1 and purified by flash column chromatography (20% EtOAc in hexanes) to afford the title compound as a colourless oil (45 mg, 81%).

**<sup>1</sup>H-NMR** (500 MHz, CDCl<sub>3</sub>): 7.26 (t, *J* = 7.4 Hz, 2H), 7.21 (t, *J* = 7.4 Hz, 1H), 7.17 (d, *J* = 7.4 Hz, 2H), 5.71 (d, *J* = 2.1 Hz, 1H), 5.44 (d, *J* = 2.1 Hz, 1H), 4.22 (p, *J* = 5.5 Hz, 1H), 3.67–3.73 (m, 2H), 2.97 (t, *J* = 7.9 Hz, 2H), 2.74 (t, *J* = 7.9 Hz, 2H), 1.59–1.76 (m, 2H), 0.93 (t, *J* = 7.5 Hz, 3H), 0.86 (s, 9H), 0.03 (s, 3H), 0.01 (s, 3H); **<sup>13</sup>C-NMR** (126 MHz, CDCl<sub>3</sub>): 170.3, 165.2, 164.4, 139.9, 128.6, 128.3, 126.4, 100.8, 88.8, 80.9, 63.8, 35.5, 32.9, 25.8, 23.4, 18.2, 9.4, -5.4, -5.5; **MS** (ESI): *m/z* (rel. %) 425 [MNa]<sup>+</sup> (19), 403 [MH]<sup>+</sup> (100), 391 (6); **HRMS** *m/z* [MH]<sup>+</sup> calcd for C<sub>23</sub>H<sub>35</sub>O<sub>4</sub>Si: 403.2299; found: 403.2300; **IR** (neat, cm<sup>-1</sup>) 2956, 2929, 2857, 1718, 1649, 1564, 1471, 1423, 1249, 1132, 1107, 838, 755.

**4-[1-(*tert*-Butyl-dimethyl-silyloxymethyl)-propoxy]-6-(6-triisopropylsilyl-hex-5-ynyl)-2-pyrone (4i)**

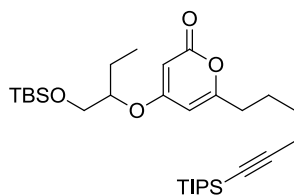

Synthesised using general procedure 1 and purified *via* flash column chromatography (20% EtOAc in hexanes) to afford a colourless oil (628 mg, 75%).

**<sup>1</sup>H-NMR** (500 MHz, CDCl<sub>3</sub>): 5.77 (d, *J* = 2.3 Hz, 1H), 5.44 (d, *J* = 2.3 Hz, 1H), 4.23 (p, *J* = 5.5 Hz, 1H), 3.68–3.74 (m, 2H), 2.47 (t, *J* = 7.5 Hz, 2H), 2.29 (t, *J* = 6.9 Hz, 2H), 1.76–1.83 (m, 2H), 1.62–1.75 (m, 2H), 1.54–1.61 (m, 2H), 0.97–1.08 (m, 21H), 0.94 (t, *J* = 7.5 Hz, 3H), 0.86 (s, 9H), 0.03 (s, 3H), 0.02 (s, 3H); **<sup>13</sup>C-NMR** (126 MHz, CDCl<sub>3</sub>): 170.4, 165.4, 165.4, 108.4, 100.3, 88.5, 80.8, 77.2, 63.7, 32.9, 27.9, 25.7, 25.6, 23.3, 19.5, 18.6, 18.2, 11.2, 9.4, -5.4, -5.5; **MS** (ESI) *m/z* (rel. %): 557 [MNa<sup>+</sup>] (19), 535 [MH<sup>+</sup>] (100), 413 (11), 391 (39); **HRMS** (ESI) calculated for C<sub>30</sub>H<sub>55</sub>O<sub>4</sub>Si<sub>2</sub> [MH<sup>+</sup>]: 535.3633, found: 535.3648.

**4-[1-(*tert*-Butyl-dimethyl-silyloxymethyl)-propoxy]-6-(non-8-en-5-ynyl)-2-pyrone (4j)**

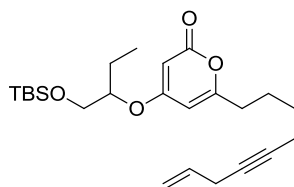

Synthesised using general procedure 1 and purified *via* flash column chromatography (20% EtOAc in hexanes) to afford a colourless oil (93 mg, 49.5%).

**<sup>1</sup>H-NMR** (500 MHz, CDCl<sub>3</sub>): 5.81 (ddt, *J* = 16.9, 10.0, 5.3 Hz, 1H), 5.76 (d, *J* = 2.2 Hz, 1H), 5.42 (d, *J* = 2.2 Hz, 1H), 5.28 (ddt, *J* = 16.9, 1.8, 1.8 Hz, 1H), 5.08 (ddt, *J* = 10.0, 1.8, 1.8 Hz, 1H), 4.22 (p, *J* = 5.5 Hz, 1H), 3.69–3.72 (m, 2H), 2.90–2.94 (m, 2H), 2.45 (t, *J* = 5.5 Hz, 2H), 2.22 (tt, *J* = 7.0, 2.4 Hz, 2H), 1.72–1.80 (m, 2H), 1.62–1.71 (m, 2H), 1.51–1.58 (m, 2H), 0.94 (t, *J* = 7.5 Hz, 3H), 0.86 (s, 9H), 0.03 (s, 3H), 0.02 (s, 3H); **<sup>13</sup>C-NMR** (126 MHz, CDCl<sub>3</sub>): 170.3, 165.3, 165.2, 133.2, 115.6, 100.3, 88.6, 81.8, 80.8, 63.7, 33.1, 28.1, 25.7, 23.4, 23.1, 21.9, 20.4, 18.5, 18.2, 9.4, -5.4, -5.5; **MS** (ESI) *m/z* (rel. %): 441 [MNa<sup>+</sup>] (60), 419 [MH<sup>+</sup>] (100), 391 (9); **HRMS** (ESI) calculated for C<sub>24</sub>H<sub>39</sub>O<sub>4</sub>Si [MH<sup>+</sup>]: 419.2612, found: 419.2620; **IR** (neat, cm<sup>-1</sup>): 2930, 2857, 1733, 1652, 1559, 1472, 1419, 1241, 1107, 1005, 837.

#### 6-(Non-8-en-5-ynyl)-4-(octa-Z,4,7-dienyloxy)-2-pyrone (4k)

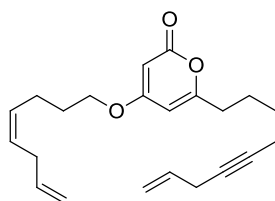

Synthesised using general procedure 1 and purified *via* flash column chromatography (20% EtOAc in hexanes) to afford a colourless oil (25 mg, 52%).

**<sup>1</sup>H-NMR** (500 MHz, CDCl<sub>3</sub>): 5.94 (d, *J* = 2.1 Hz, 1H), 5.74–5.86 (m, 2H), 5.52–5.41 (m, 2H), 5.40 (d, *J* = 2.1 Hz, 1H), 5.29 (ddt, *J* = 17.0, 1.7, 1.7 Hz, 1H), 5.09 (ddt, *J* = 10.0, 1.7, 1.7 Hz, 1H), 5.02 (ddt, *J* = 17.1, 3.4, 1.7 Hz, 1H), 4.98 (ddt, *J* = 10.2, 3.4, 1.6 Hz, 1H), 3.94 (t, *J* = 6.4 Hz, 2H), 2.91–2.96 (m, 2H), 2.74–2.83 (m, 2H), 2.15–2.27 (m, 4H), 1.89–2.06 (m, 2H), 1.80–1.88 (m, 2H), 1.56–1.71 (m, 4H); **<sup>13</sup>C-NMR** (126 MHz, CDCl<sub>3</sub>): 170.2, 166.1, 164.2, 136.6, 128.9, 128.8, 128.5, 115.7, 114.9, 100.1, 88.7, 81.6, 77.5, 68.2, 48.0, 33.1, 31.4, 31.1, 28.2, 23.2, 23.1, 14.4; **MS** (ESI) *m/z* (rel. %): 363 [MNa<sup>+</sup>] (23), 341 [MH<sup>+</sup>] (36), 329 (69), 307 (100); **HRMS** (ESI) calculated for C<sub>22</sub>H<sub>29</sub>O<sub>3</sub>: 341.2111, found: 341.2114.

#### 6-(Non-8-en-5-ynyl)-4-(oct-7-en-4-ynyloxy)-2-pyrone (4l)

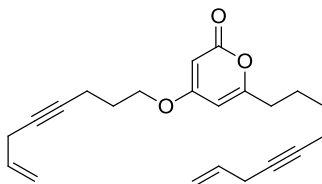

Synthesised using general procedure 1 and purified *via* flash column chromatography (20% EtOAc in hexanes) to afford a colourless oil (59.3 mg, 61%).

**<sup>1</sup>H-NMR** (500 MHz, CDCl<sub>3</sub>): 5.76–5.87 (m, 3H), 5.41 (d, *J* = 2.2 Hz, 1H), 5.29 (ddt, *J* = 16.9, 1.8, 1.8 Hz, 1H), 5.28 (ddt, *J* = 16.9, 1.8, 1.8 Hz, 1H), 5.09 (app. dp, *J* = 10.0, 1.8 Hz, 2H), 4.05 (t, *J* = 6.2 Hz, 2H), 2.91–2.95 (m, 4H), 2.46 (t, *J* = 7.5 Hz, 2H), 2.37 (tt, *J* = 6.8, 2.4 Hz, 2H), 2.23 (tt, *J* = 7.0, 2.4 Hz, 2H), 1.96 (p, *J* = 6.6 Hz, 2H), 1.72–1.80 (m, 2H), 1.51–1.59 (m, 2H); **<sup>13</sup>C-NMR** (126 MHz, CDCl<sub>3</sub>): 170.5, 165.3, 165.1, 133.2, 133.0, 115.8, 115.77, 100.0, 88.1, 81.9, 80.5, 78.0, 67.2, 62.0, 33.1, 28.1, 27.8, 25.7, 23.1, 23.0, 18.5, 15.3; **MS** (ESI) *m/z* (rel.%): 339 [MH<sup>+</sup>] (48), 333 (69), 313 (100); **HRMS** (ESI) calculated for C<sub>22</sub>H<sub>27</sub>O<sub>3</sub>: 339.1955, found: 339.1949; **IR** (neat, cm<sup>-1</sup>): 2939, 1700, 1642, 1564, 1436, 1249, 914, 733.

### 1-Toluenesulfonyloxybutan-2-ol (5d)<sup>10</sup>

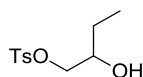

A solution of toluenesulfonyl chloride (51.5 g, 270 mmol, 1 eq.), triethylamine (54.6 g, 405 mmol, 1.5 eq.) and butane-1,2-diol (36.5 g, 540 mmol, 2 eq.) under nitrogen in dichloromethane (800 mL), was stirred at 20 °C for 16 h. The reaction was then quenched with ice cold water (550 mL) and the aqueous layer removed. The organic layer was then washed sequentially with ice-cold 2 M HCl (550 mL), sat. NaHCO<sub>3</sub> (550 mL) and brine (550 mL). The organic phase was then dried over MgSO<sub>4</sub>, filtered and concentrated *in vacuo* to afford the crude material. The product was purified *via* flash column chromatography (10% EtOAc in toluene) to afford a white crystalline powder (53 g, 80%).

**M. P.** 59–61 °C (lit. 59–60 °C); **<sup>1</sup>H-NMR** (400 MHz, CDCl<sub>3</sub>): 7.80 (d, *J* = 8.1 Hz, 2H), 7.35 (d, *J* = 8.1 Hz, 2H), 4.05 (dd, *J* = 10.1, 3.1 Hz, 1H), 3.90 (dd, *J* = 7.1, 10.1 Hz, 1H), 3.77 (qd, *J* = 7.1, 3.1 Hz, 1H), 2.45 (s, 3H), 1.51–1.44 (m, 2H), 0.93 (t, *J* = 7.5 Hz, 3H); **<sup>13</sup>C-NMR** (100 MHz, CDCl<sub>3</sub>): 145.02, 132.78, 129.92, 127.94, 73.62, 70.79, 25.75, 21.62, 9.56; **MS** (ESI) *m/z* (rel. %): 245 [MH<sup>+</sup>] (72), 227 (13), 173 (21); **IR** (neat, cm<sup>-1</sup>): 3536, 2968, 2881, 1598, 1456, 1359, 1161, 1097, 963.

### Methyl 3-(6-methyl-2-pyronyl-4-oxy)-acrylate (7a)

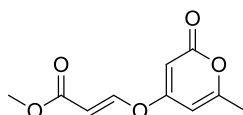

Synthesised using general procedure 2 and purified by column chromatography (20% EtOAc in hexanes) to afford a yellow crystalline powder (12.85 g, 82%).

**M. P.** 129–130 °C; **<sup>1</sup>H-NMR** (400 MHz, CDCl<sub>3</sub>): 7.67 (d, *J* = 12.0 Hz, 1H), 5.91 (dd, *J* = 2.2, 1.0 Hz, 1H), 5.85 (d, *J* = 12.0 Hz, 1H), 5.65 (d, *J* = 2.2 Hz, 1H), 3.78 (s, 3H), 2.28–2.26 (m, 3H); **<sup>13</sup>C-NMR** (100 MHz, CDCl<sub>3</sub>): 167.2, 165.9, 164.2, 163.3, 152.5, 107.7, 99.1, 92.1, 48.8, 20.1; **MS** (ESI) *m/z* (rel. %): 233 [MNa<sup>+</sup>] (100), 177 (5); **HRMS** (ESI) calculated for C<sub>10</sub>H<sub>10</sub>O<sub>5</sub>Na [M<sup>+</sup>]: 233.0420, found: 233.0429; **IR** (CH<sub>2</sub>Cl<sub>2</sub>, cm<sup>-1</sup>): 3061, 2953, 1723, 1644, 1576, 1447, 1406, 1258, 1186, 1101.

**tert-Butyl 3-(6-methyl-2-pyronyl-4-oxy)-acrylate (7b)**

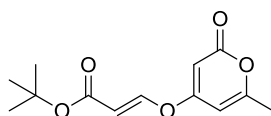

Synthesised using general procedure 2 and purified *via* flash column chromatography (20% EtOAc in hexanes) to afford a yellow crystalline powder (98 mg, 61%).

**M. P.** 60–62 °C; **<sup>1</sup>H-NMR** (400 MHz, CDCl<sub>3</sub>): 7.54 (d, *J* = 12.0 Hz, 1H), 5.90 (d, *J* = 2.2 Hz, 1H), 5.74 (d, *J* = 12.0 Hz, 1H), 5.63 (d, *J* = 2.2 Hz, 1H), 2.25 (s, 3H), 1.48 (s, 9H); **<sup>13</sup>C-NMR** (101 MHz, CDCl<sub>3</sub>): 167.3, 164.7, 164.0, 163.6, 151.5, 110.0, 99.3, 91.8, 81.3, 28.1, 20.1; **MS** (ESI) *m/z* (rel. %): 275 [MNa<sup>+</sup>] (34), 253 [MH<sup>+</sup>] (100), 197 (8); **HRMS** (ESI) calculated for C<sub>13</sub>H<sub>17</sub>O<sub>5</sub>: 253.1071, found: 253.1068; **IR** (neat, cm<sup>-1</sup>): 3082, 2980, 2160, 1720, 1696, 1658, 1623, 1561, 1235, 1149, 1091, 845.

**Pentafluorophenyl 3-(6-methyl-2-pyronyl-4-oxy)-acrylate (7c)**

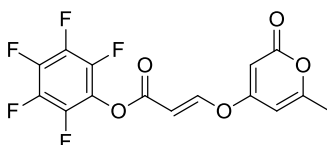

Synthesised using general procedure 2 and purified *via* flash column chromatography (20% EtOAc in hexanes) to afford a yellow crystalline powder (102 mg, 27%).

**M. P.** 102–105 °C; **<sup>1</sup>H-NMR** (400 MHz, CDCl<sub>3</sub>): 7.93 (d, *J* = 12.0 Hz, 1H), 6.05 (d, *J* = 12.0 Hz, 1H), 5.96 (dq, *J* = 2.2, 0.9 Hz, 1H), 5.74 (d, *J* = 2.2 Hz, 1H), 2.29 (t, *J* = 0.9 Hz, 3H); **<sup>13</sup>C-NMR** (101 MHz, CDCl<sub>3</sub>): 166.7, 164.7, 163.1, 161.5, 155.9, 104.3, 98.9, 92.9, 20.2 (carbons on perfluorophenyl ring not observed); **<sup>19</sup>F-NMR** (376 MHz, CDCl<sub>3</sub>): -152.30–-152.41 (m, 2F), -157.31 (t, *J* = 21.7, 1F), -161.82–-161.99 (m, 2F); **MS** (ESI) *m/z* (rel. %): 380 [MNa<sup>+</sup>] (52), 363 [MH<sup>+</sup>] (100), 301 (14), 279 (26); **HRMS** (ESI) calculated for C<sub>15</sub>H<sub>8</sub>F<sub>5</sub>O<sub>5</sub> [MH<sup>+</sup>]: 363.0286, found: 363.0299; **IR** (neat, cm<sup>-1</sup>): 3106, 2916, 2160, 1731, 1641, 1577, 1516, 1280, 1227, 1185, 997.

### Methyl 3-(6-(non-8-en-5-ynyl)-2-pyronyl-4-oxy)-acrylate (7e)

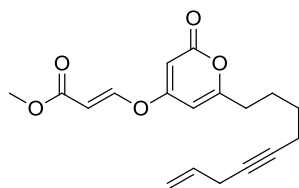

Synthesised using general procedure 2 and purified *via* flash column chromatography (20% EtOAc in hexanes) to afford a waxy yellow powder (28.9 mg, 64%).

**<sup>1</sup>H-NMR** (400 MHz, CDCl<sub>3</sub>): 7.68 (d, *J* = 12.0 Hz, 1H), 5.92 (dt, *J* = 2.3, 0.7 Hz, 1H), 5.85 (d, *J* = 12.0 Hz, 1H), 5.82 (ddt, *J* = 16.9, 10.0, 5.3 Hz, 1H), 5.66 (d, *J* = 2.3 Hz, 1H), 5.29 (ddt, *J* = 16.9, 1.8, 1.8 Hz, 1H), 5.09 (ddt, *J* = 10.0, 1.8, 1.8 Hz, 1H), 3.77 (s, 3H), 2.91–2.96 (m, 2H), 2.53 (dt, *J* = 7.6, 0.7 Hz, 2H), 2.24 (tt, *J* = 2.4, 6.9 Hz, 2H), 1.74–1.83 (m, 2H), 1.51–1.62 (m, 2H, C<sup>9</sup>H<sub>2</sub>); **<sup>13</sup>C-NMR** (101 MHz, CDCl<sub>3</sub>): 167.5, 167.1, 166.0, 163.5, 152.4, 133.2, 115.7, 107.7, 99.9, 98.6, 92.1, 81.7, 51.9, 33.4, 28.1, 25.7, 23.1, 18.4; **MS** (ESI) *m/z* (rel.%): 339 [MNa<sup>+</sup>] (63), 317 [MH<sup>+</sup>] (100), 210 (7), 180 (7); **HRMS** (ESI) calculated for C<sub>18</sub>H<sub>21</sub>O<sub>5</sub> [MH<sup>+</sup>]: 317.1384, found: 317.1379; **IR** (neat, cm<sup>-1</sup>): 3091, 2947, 2160, 1710, 1636, 1567, 1415, 1221, 1098, 823.

### Methyl 3-(6-(2-phenylethyl)-2-pyronyl-4-oxy)-acrylate (7f)

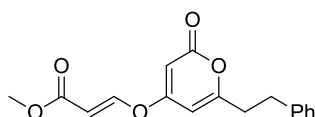

Synthesised using general procedure 2 and purified *via* flash column chromatography (20% EtOAc in hexanes) to afford a yellow crystalline powder (19.3 mg, 68%).

**<sup>1</sup>H-NMR** (400 MHz, CDCl<sub>3</sub>): 7.65 (d, *J* = 12.1 Hz, 1H), 7.33–7.28 (m, 2H), 7.25–7.20 (m, 1H), 7.19–7.15 (m, 2H), 5.84 (dt, *J* = 2.3, 0.7 Hz, 1H), 5.82 (d, *J* = 12.1 Hz, 1H), 5.66 (d, *J* = 2.3 Hz, 1H), 3.77 (s, 3H), 2.99 (t, *J* = 7.8 Hz, 2H), 2.81 (td, *J* = 7.7, 0.7 Hz, 2H); **<sup>13</sup>C-NMR** (101 MHz, CDCl<sub>3</sub>): 167.1, 166.5, 166.0, 163.5, 152.5, 139.6, 128.8, 128.4, 126.7, 107.8, 99.2, 92.5, 52.0, 35.8, 32.9; **MS** (ESI) *m/z* (rel. %): 301 [MH<sup>+</sup>] (100); **HRMS** (ESI) calculated for C<sub>17</sub>H<sub>17</sub>O<sub>5</sub>: 301.1071, found: 301.1069; **IR** (CHCl<sub>3</sub>, cm<sup>-1</sup>): 3019, 2363, 1721, 1641, 1573, 1416, 1101, 670.

### Methyl 3-(6-(but-3-enyl)-2-pyronyl-4-oxy)-acrylate (7g)

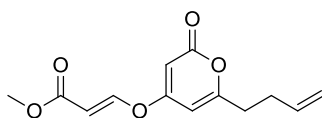

Synthesised using general procedure 2 and purified *via* flash column chromatography (20% EtOAc in hexanes) to afford a yellow crystalline powder (18.1 mg, 86%).

**<sup>1</sup>H-NMR** (500 MHz, CDCl<sub>3</sub>): 7.67 (d, *J* = 12.1 Hz, 1H), 5.90 (d, *J* = 2.1 Hz, 1H), 5.84 (d, *J* = 12.1 Hz, 1H), 5.78 (ddt, *J* = 17.0, 10.1, 6.7 Hz, 1H), 5.65 (d, *J* = 2.1 Hz, 1H), 5.08 (ddt, *J* = 17.0, 1.5, 1.5 Hz, 1H), 5.05 (ddt, *J* = 10.1, 1.5, 1.5 Hz, 1H), 3.77 (s, 3H), 2.60 (t, *J* = 7.9 Hz, 2H), 2.41–2.45 (m, 2H); **<sup>13</sup>C-NMR** (101 MHz, CDCl<sub>3</sub>): 167.1, 166.8, 165.9, 163.3, 152.5, 135.7, 116.6, 107.7, 98.8, 92.3, 51.8, 33.2, 30.5; **MS** (ESI) *m/z* (rel.%): 251 [MH<sup>+</sup>] (100); **HRMS** (ESI) calculated for C<sub>13</sub>H<sub>15</sub>O<sub>5</sub>: 251.0914, found: 251.0917; **IR** (CHCl<sub>3</sub>, cm<sup>-1</sup>): 3077, 2955, 2362, 1722, 1639, 1574, 1415, 1325, 1223, 1163, 1099.

### Methyl 3-(6-(6-triisopropylsilyl-hex-5-ynyl)-2-pyronyl-4-oxy)-acrylate (7h)

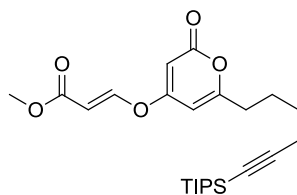

Synthesised using general procedure 2 and purified *via* flash column chromatography (20% EtOAc in hexanes) to afford a waxy yellow powder (102 mg, 82%).

**<sup>1</sup>H-NMR** (400 MHz, CDCl<sub>3</sub>): 7.68 (d, *J* = 12.0 Hz, 1H), 5.90 (d, *J* = 2.3 Hz, 1H), 5.84 (d, *J* = 12.0 Hz, 1H), 5.65 (d, *J* = 2.3 Hz, 1H), 3.77 (s, 3H), 2.53 (t, *J* = 7.5 Hz, 2H), 2.30 (t, *J* = 6.9 Hz, 2H), 1.77–1.86 (m, 2H), 1.54–1.63 (m, 2H), 1.00–1.08 (m, 21H); **<sup>13</sup>C-NMR** (101 MHz, CDCl<sub>3</sub>): 167.5, 167.1, 165.9, 163.4, 152.4, 107.8, 107.7, 98.5, 92.1, 81.0, 51.8, 33.2, 27.8, 25.5, 19.4, 18.6, 11.2; **MS** (ESI) *m/z* (rel.%): 455 [MNa<sup>+</sup>] (100), 433 [MH<sup>+</sup>] (51), 399 (5), 377 (3), 326 (4), 289 (12), 267 (8), 242 (10), 217 (7), 180 (4); **HRMS** (ESI) calculated for C<sub>24</sub>H<sub>36</sub>NaO<sub>5</sub>Si [MNa<sup>+</sup>]: 455.2224, found: 455.2213; **IR** (CHCl<sub>3</sub>, cm<sup>-1</sup>): 3023, 2956, 2866, 2362, 1721, 1641, 1574, 1418, 1215, 1101.



### Pentafluorophenyl 3-(6-(6-triisopropylsilyl-hex-5-ynyl)-2-pyronyl-4-oxy)-acrylate (7i)

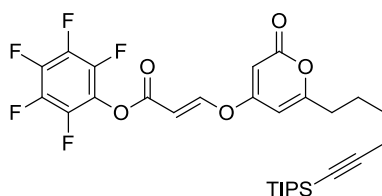

Synthesised using general procedure 2 and product purified *via* flash column chromatography (20% EtOAc in hexanes) to afford a waxy yellow powder (65.7 mg, 37%).

**<sup>1</sup>H-NMR** (400 MHz, CDCl<sub>3</sub>): 7.94 (d, *J* = 12.0 Hz, 1H), 6.06 (d, *J* = 12.0 Hz, 1H), 5.97 (d, *J* = 2.3 Hz, 1H), 5.75 (d, *J* = 2.3 Hz, 1H), 2.57 (t, *J* = 7.6 Hz, 2H), 2.32 (t, *J* = 6.9 Hz, 2H), 1.79–1.89 (m, 2H), 1.55–1.66 (m, 2H), 1.01–1.09 (m, 21H); **<sup>13</sup>C-NMR** (101 MHz, CDCl<sub>3</sub>): 168.1, 166.8, 163.2, 161.5, 155.8, 107.8, 104.3, 98.3, 93.0, 81.1, 33.3, 27.8, 25.5, 19.4, 18.6, 11.2 (carbons on perfluorophenyl ring not observed); **<sup>19</sup>F-NMR** (376 MHz, CDCl<sub>3</sub>): –152.22––152.50 (m, 2F), –157.29 (t, *J* = 21.7, 1F), –161.75––162.06 (m, 2F); **MS** (ESI) *m/z* (rel. %): 607 [MNa<sup>+</sup>] (79), 471 (53), 284 (74), 247 (100), 225 (20); **HRMS** (ESI) calculated for C<sub>29</sub>H<sub>33</sub>F<sub>5</sub>NaO<sub>5</sub>Si [MNa<sup>+</sup>]: 607.1910, found: 607.1925; **IR** (neat, cm<sup>-1</sup>): 3093, 2946, 2865, 2167, 1717, 1637, 1571, 1517, 1181, 1005.

### Ethyl 3-(6-methyl-2-pyronyl-4-oxy)-but-2-enoate (9)

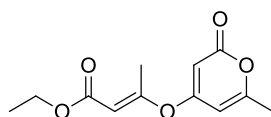

**Method A:** Synthesised using general procedure 2 with allene **8** and purified *via* flash column chromatography (30% EtOAc in hexanes) to afford a waxy yellow solid (61.4 mg, 52%).

**Method B:** A solution of 4-hydroxy-6-methyl-2-pyrone (**3a**) (126 mg, 1 mmol, 1 eq.), ethyl 2-butynoate (134 mg, 1.2 mmol, 1.2 eq.), DBU (100 mg, 0.66 mmol, 0.66 eq.), and CuI (19 mg, 0.1 mmol, 10 mol%) in THF (2 mL) was heated under nitrogen at 80 °C in a microwave for 30 minutes. The solvent was removed *in vacuo* and the product purified by column chromatography (30% EtOAc in hexanes) to afford a waxy yellow solid (102 mg, 43%).

**R<sub>f</sub>** = 0.43 (40% EtOAc in hexanes); **<sup>1</sup>H-NMR** (400 MHz, CDCl<sub>3</sub>): 5.87 (dq, *J* = 2.0, 0.8 Hz, 1H), 5.57 (dd, *J* = 2.0, 0.6 Hz, 1H), 5.52 (q, *J* = 0.9 Hz, 1H), 4.19 (q, *J* = 7.1 Hz, 2H), 2.38 (d, *J* = 0.9 Hz, 3H), 2.26 (dd, *J* = 0.8, 0.6 Hz, 3H), 1.29 (t, *J* = 7.1 Hz, 3H); **<sup>13</sup>C-NMR** (100 MHz, CDCl<sub>3</sub>): 167.2, 165.8, 165.6, 163.9, 107.5, 100.1, 94.4, 79.9, 60.4, 20.1, 17.4, 14.2; **MS** (ESI) *m/z* (rel. %): 261 [MNa<sup>+</sup>] (100), 177 (2), 153 (4); **HRMS** (ESI) calculated for

C<sub>12</sub>H<sub>14</sub>O<sub>5</sub>Na [M<sup>+</sup>]: 261.0733, found: 261.0738; IR (CH<sub>2</sub>Cl<sub>2</sub>, cm<sup>-1</sup>): 3018, 2919, 2871, 2774, 1729, 1643, 1556, 1384, 1335, 1168.

## 5. References

1. Burns, M. J.; Thatcher, R. J.; Taylor, R. J. K.; Fairlamb, I. J. S. *Dalton Trans.* **2010**, 39, 10391–10400.
2. Pàmies, O.; Bäckvall, J.-E. *J. Org. Chem.* **2003**, 68, 4815–4818.
3. Wong, C. H.; Mazonod, F. P.; Whitesides, G. M. *J. Org. Chem.* **1983**, 48, 3493–3497.
4. Alexakis, A.; Cahiez, G.; Normant, J. F. *Synthesis* **1979**, 1979, 826–830.
5. Pirrung, F. O. H.; Hiemstra, H.; Nico Speckamp, W.; Kaptein, B.; Schoemaker, H. E. *Tetrahedron* **1994**, 50, 12415–12442.
6. Brooke, G. M.; Matthews, R. S.; Harman, M. E.; Hursthouse, M. B. *J. Fluorine Chem.* **1991**, 53, 339–354.
7. Zhang, X.; McLaughlin, M.; Muñoz, R. L. P.; Hsung, R. P.; Wang, J.; Swidorski, J. *Synthesis* **2007**, 2007, 749–753.
8. Begley, M. J.; Pattenden, G.; Robertson, G. M. *J. Chem. Soc., Perkin Trans. 1* **1988**, 1085–1094.
9. Shimo, T.; Yasuda, M.; Tajima, J.; Somekawa, K. *J. Heterocyclic Chem.* **1991**, 28, 745–748.
10. Bonini, C.; Federici, C.; Rossi, L.; Righi, G. *J. Org. Chem.* **1995**, 60, 4803–4812.

## 6. Representative $^1\text{H}$ NMR spectra for novel compounds

The following  $^1\text{H}$  NMR spectra are representative of the novel compounds synthesized in this study. Due to the polarity and/or volatility of some of these compounds, trace impurities (e.g. solvent) are visible in some cases.

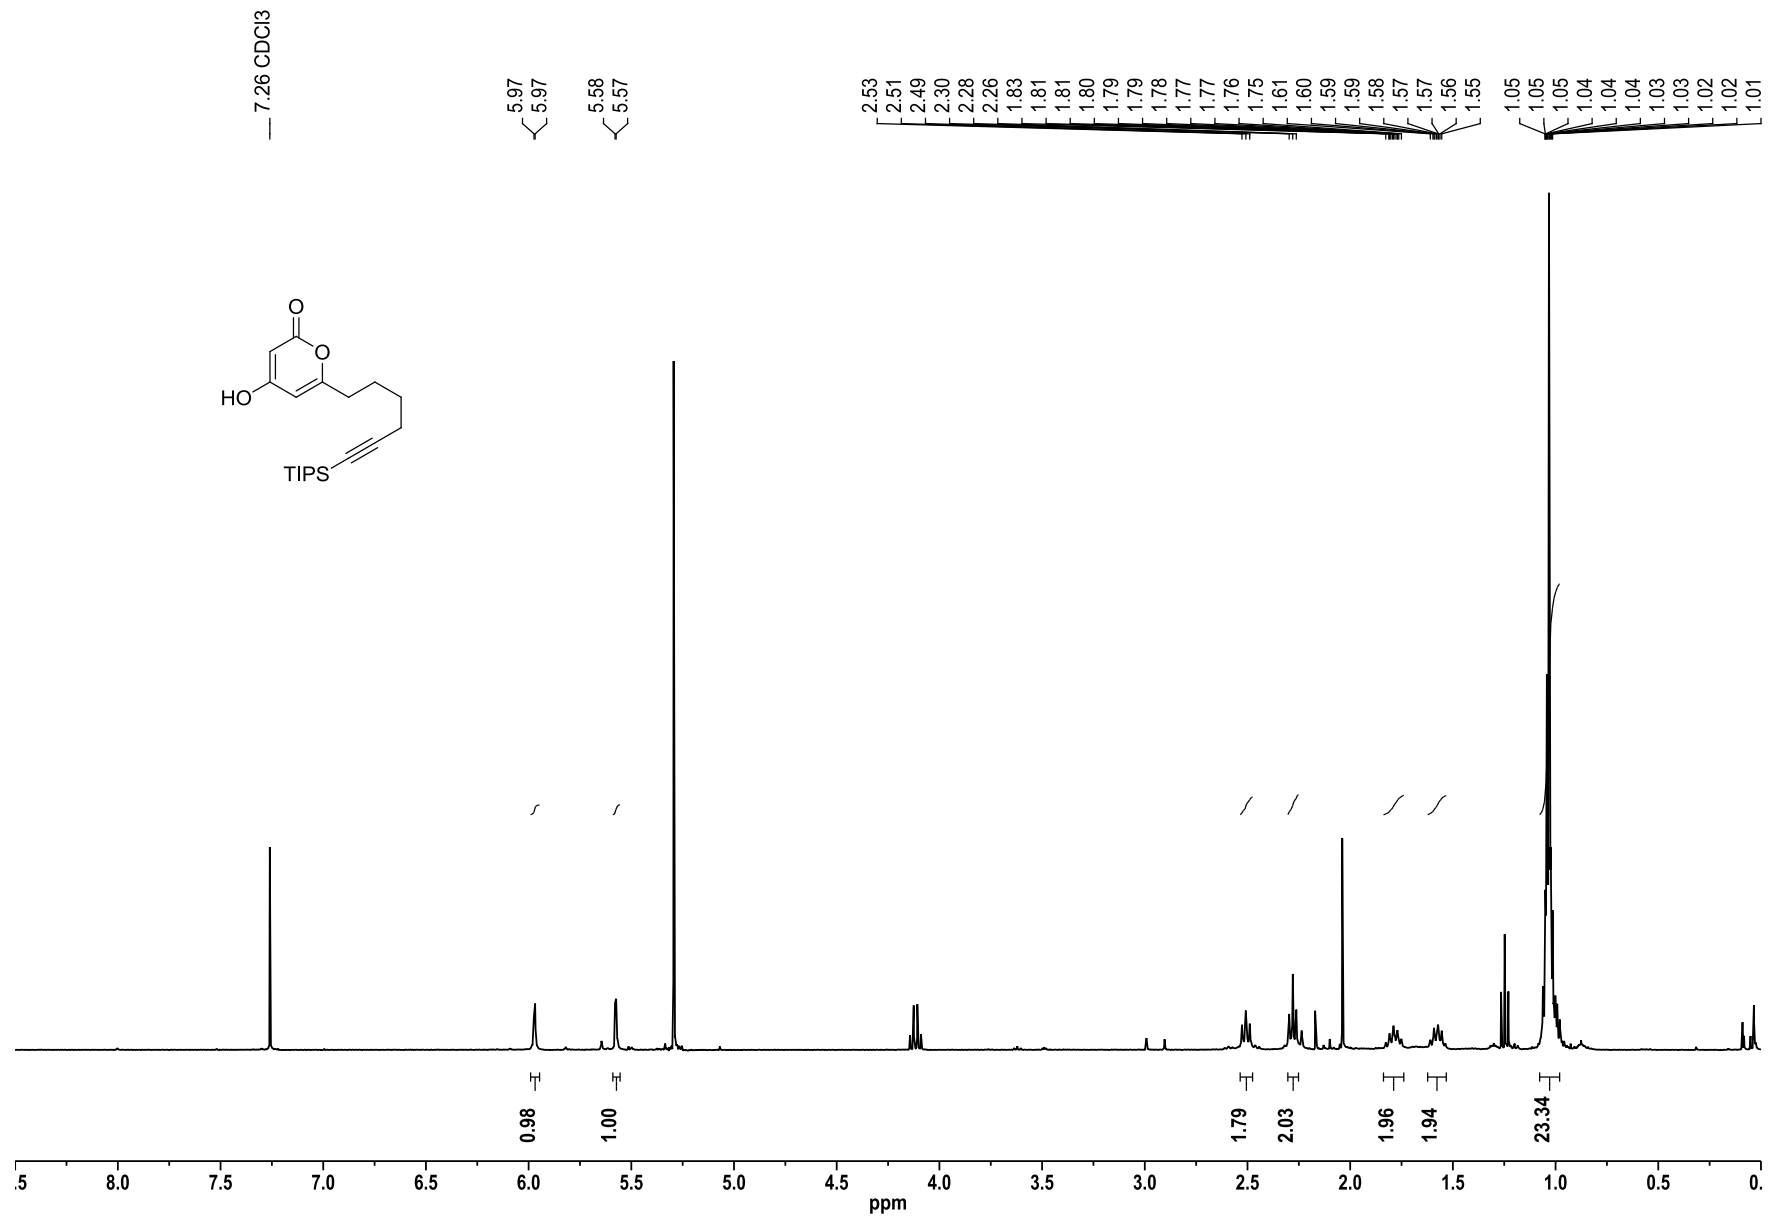

Figure S1 <sup>1</sup>H NMR spectrum of **3c**.

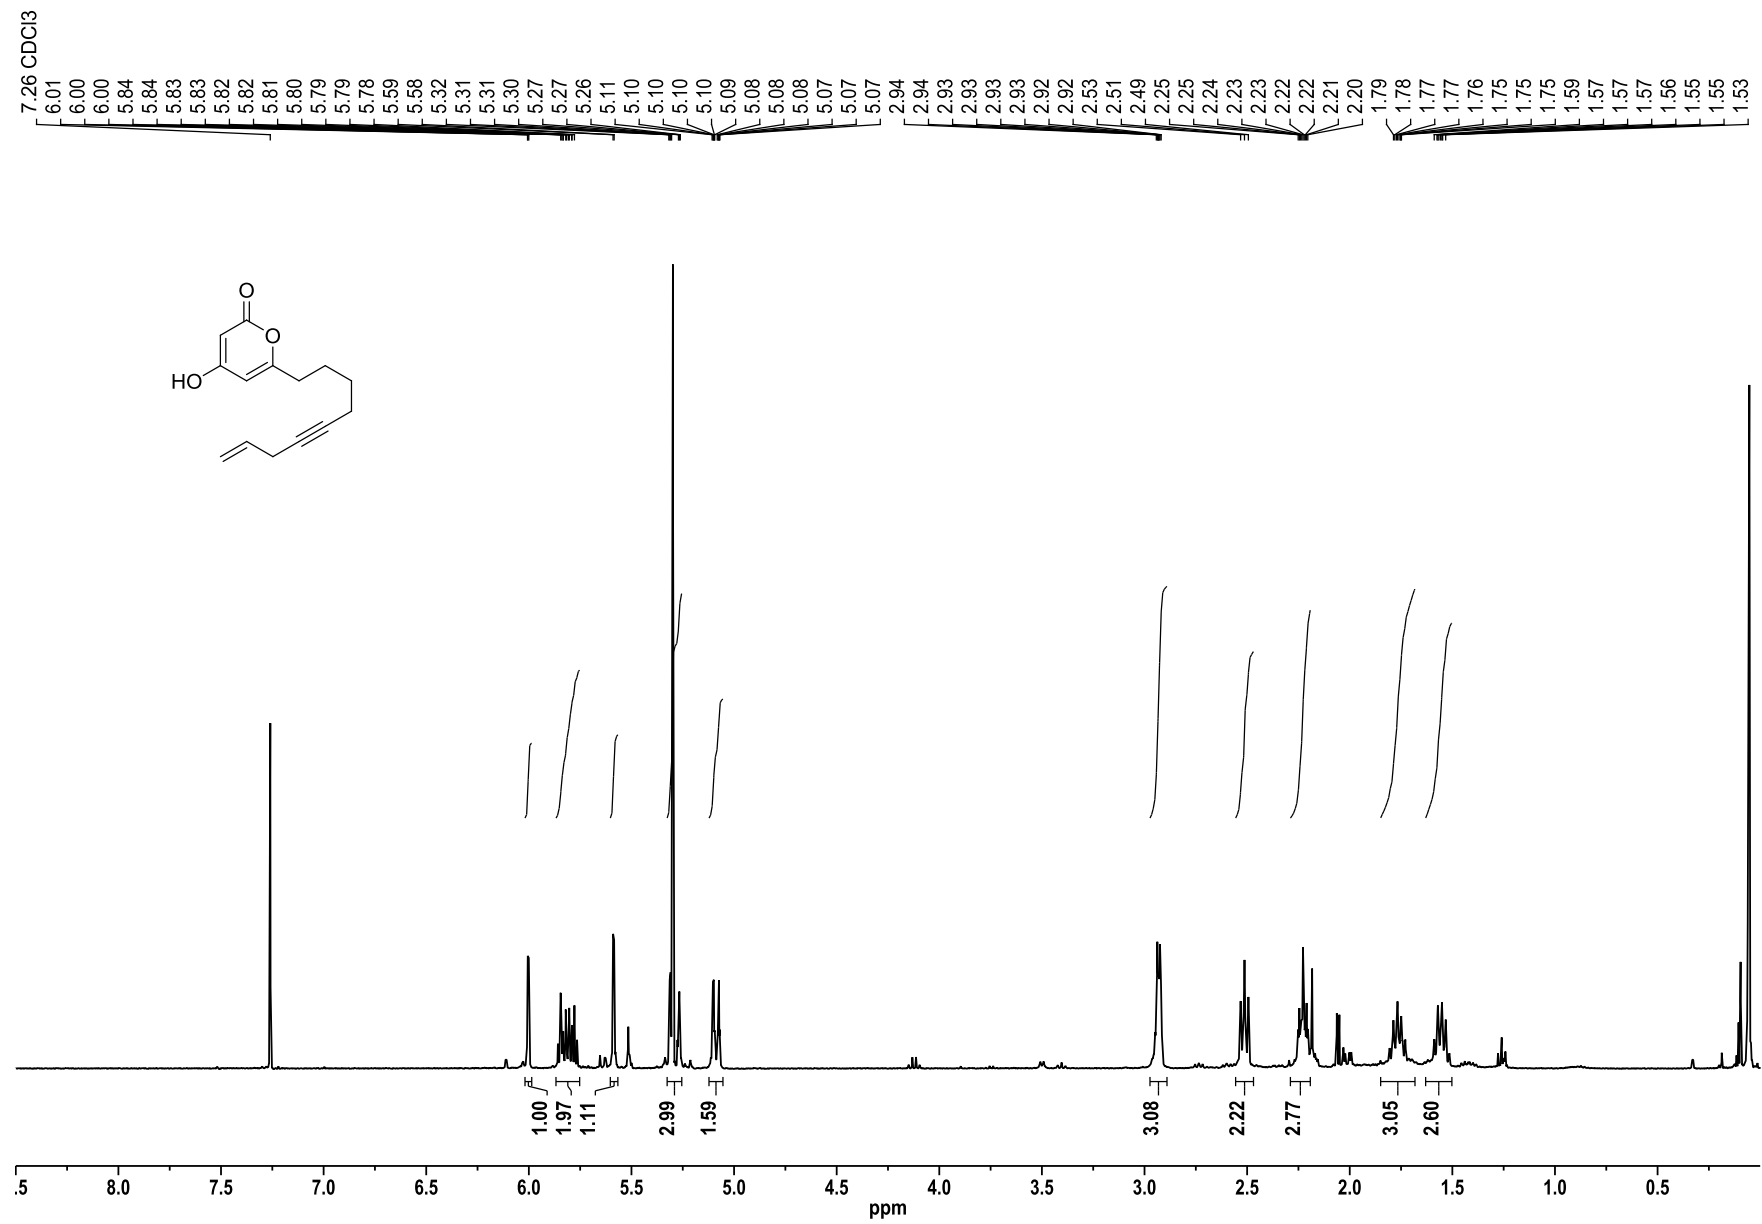

Figure S2 <sup>1</sup>H NMR spectrum of 3d.

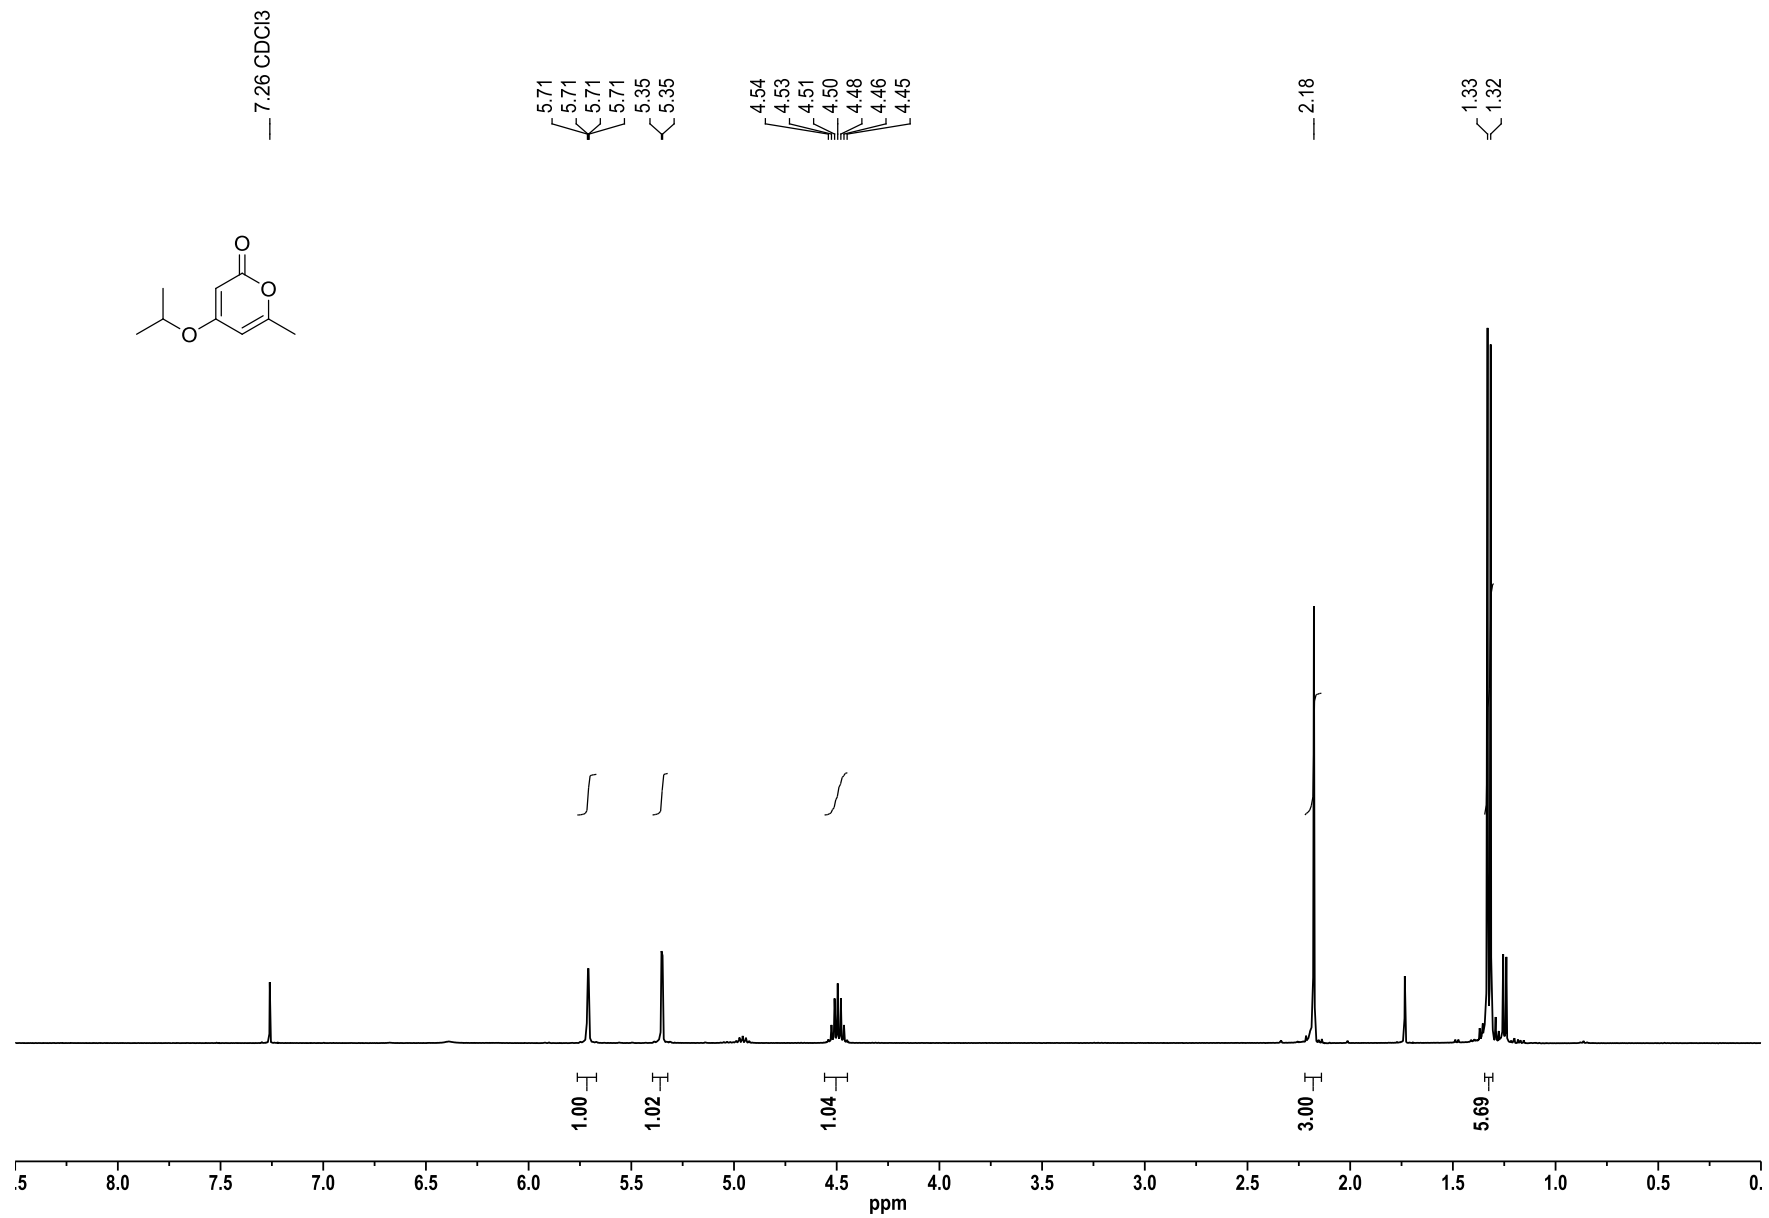

Figure S3  $^1\text{H NMR}$  spectrum of 4a.

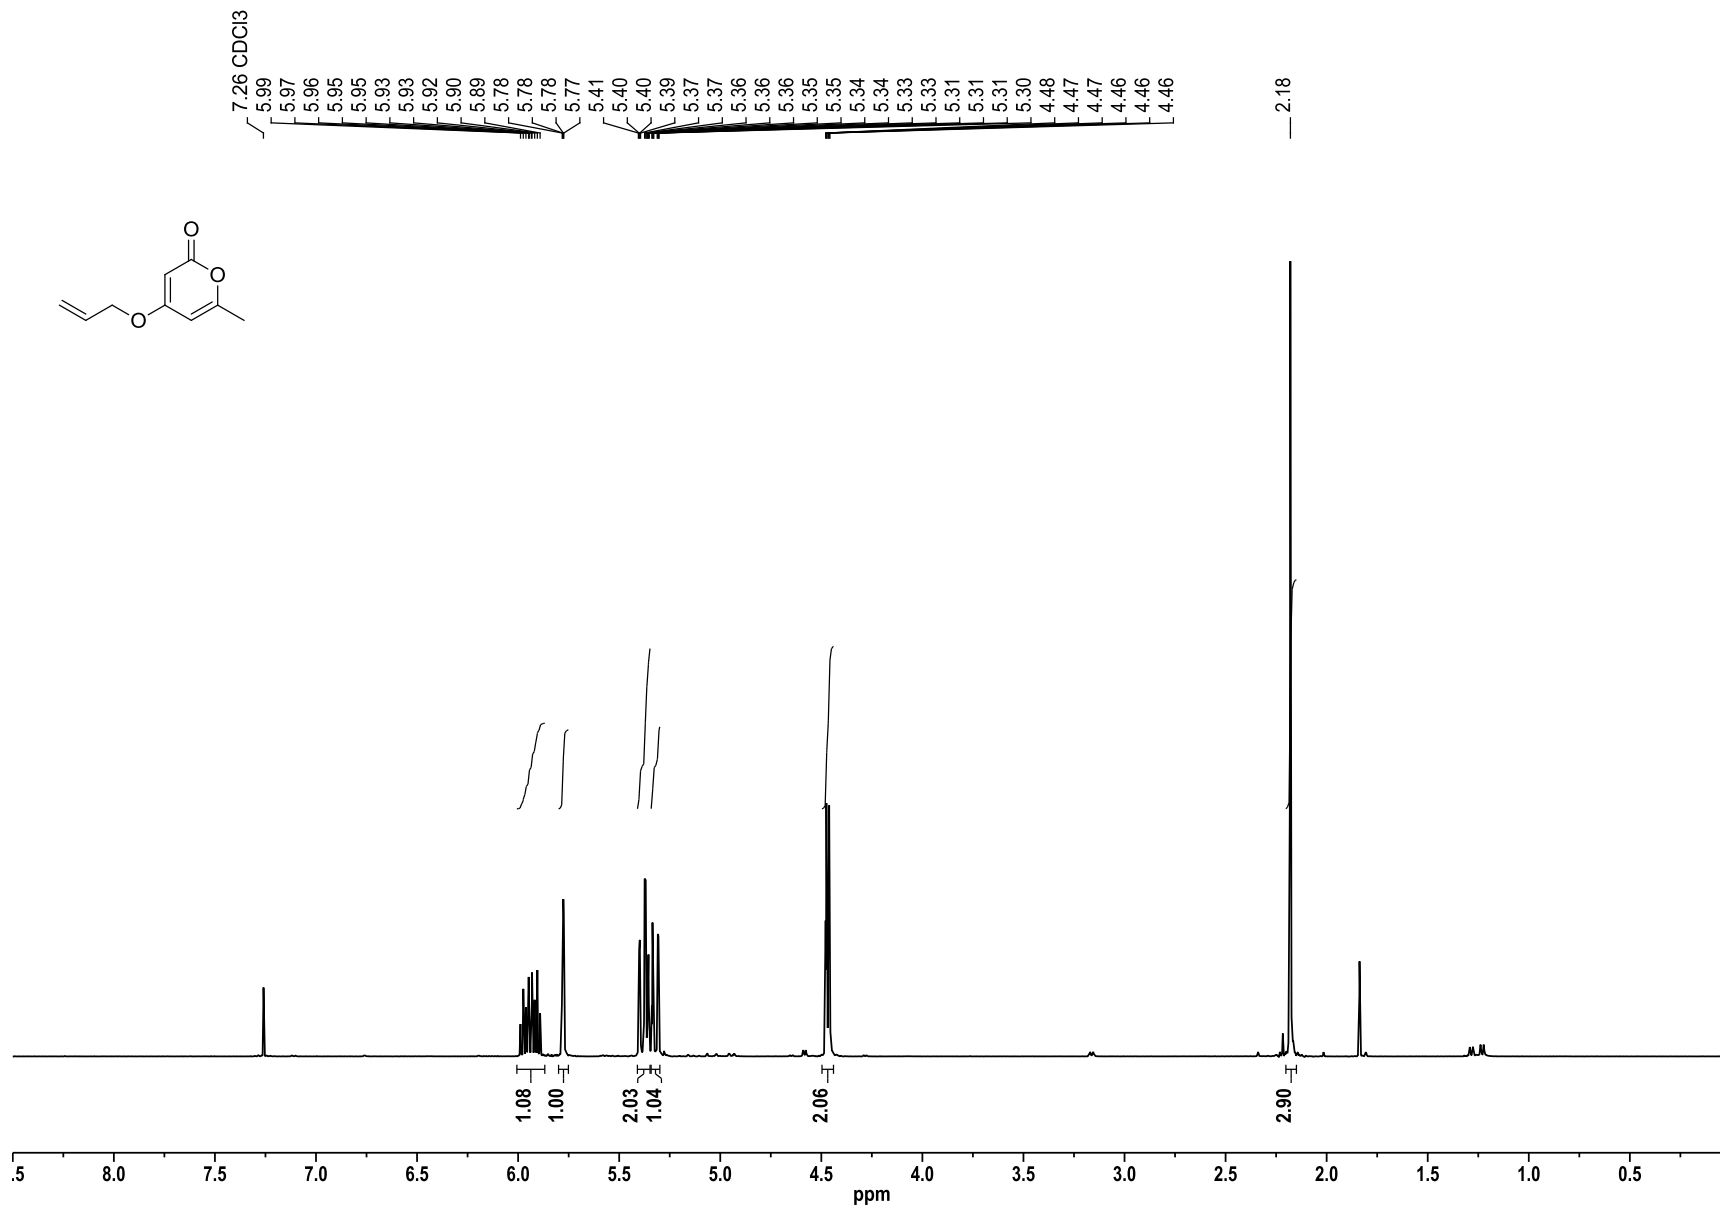

Figure S4 <sup>1</sup>H NMR spectrum of 4b.

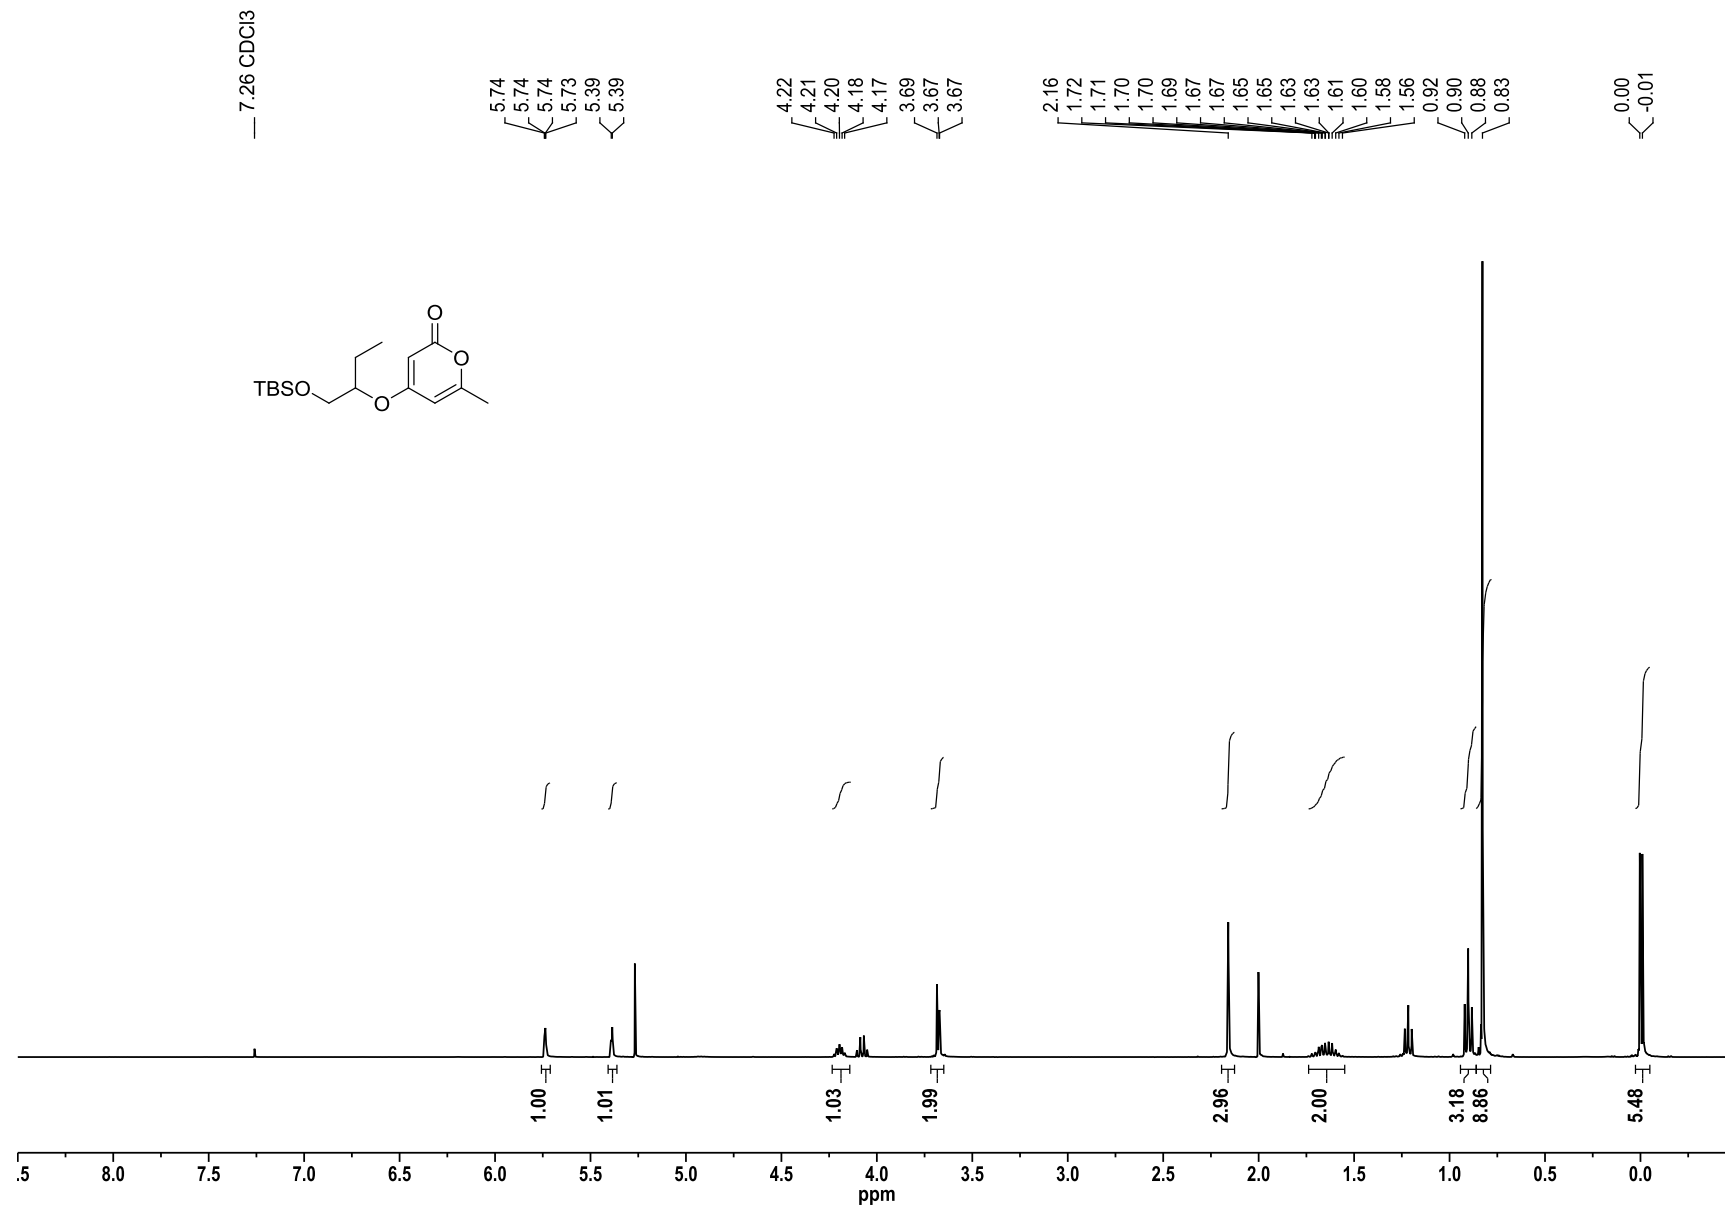

Figure S5 <sup>1</sup>H NMR spectrum of 4c.



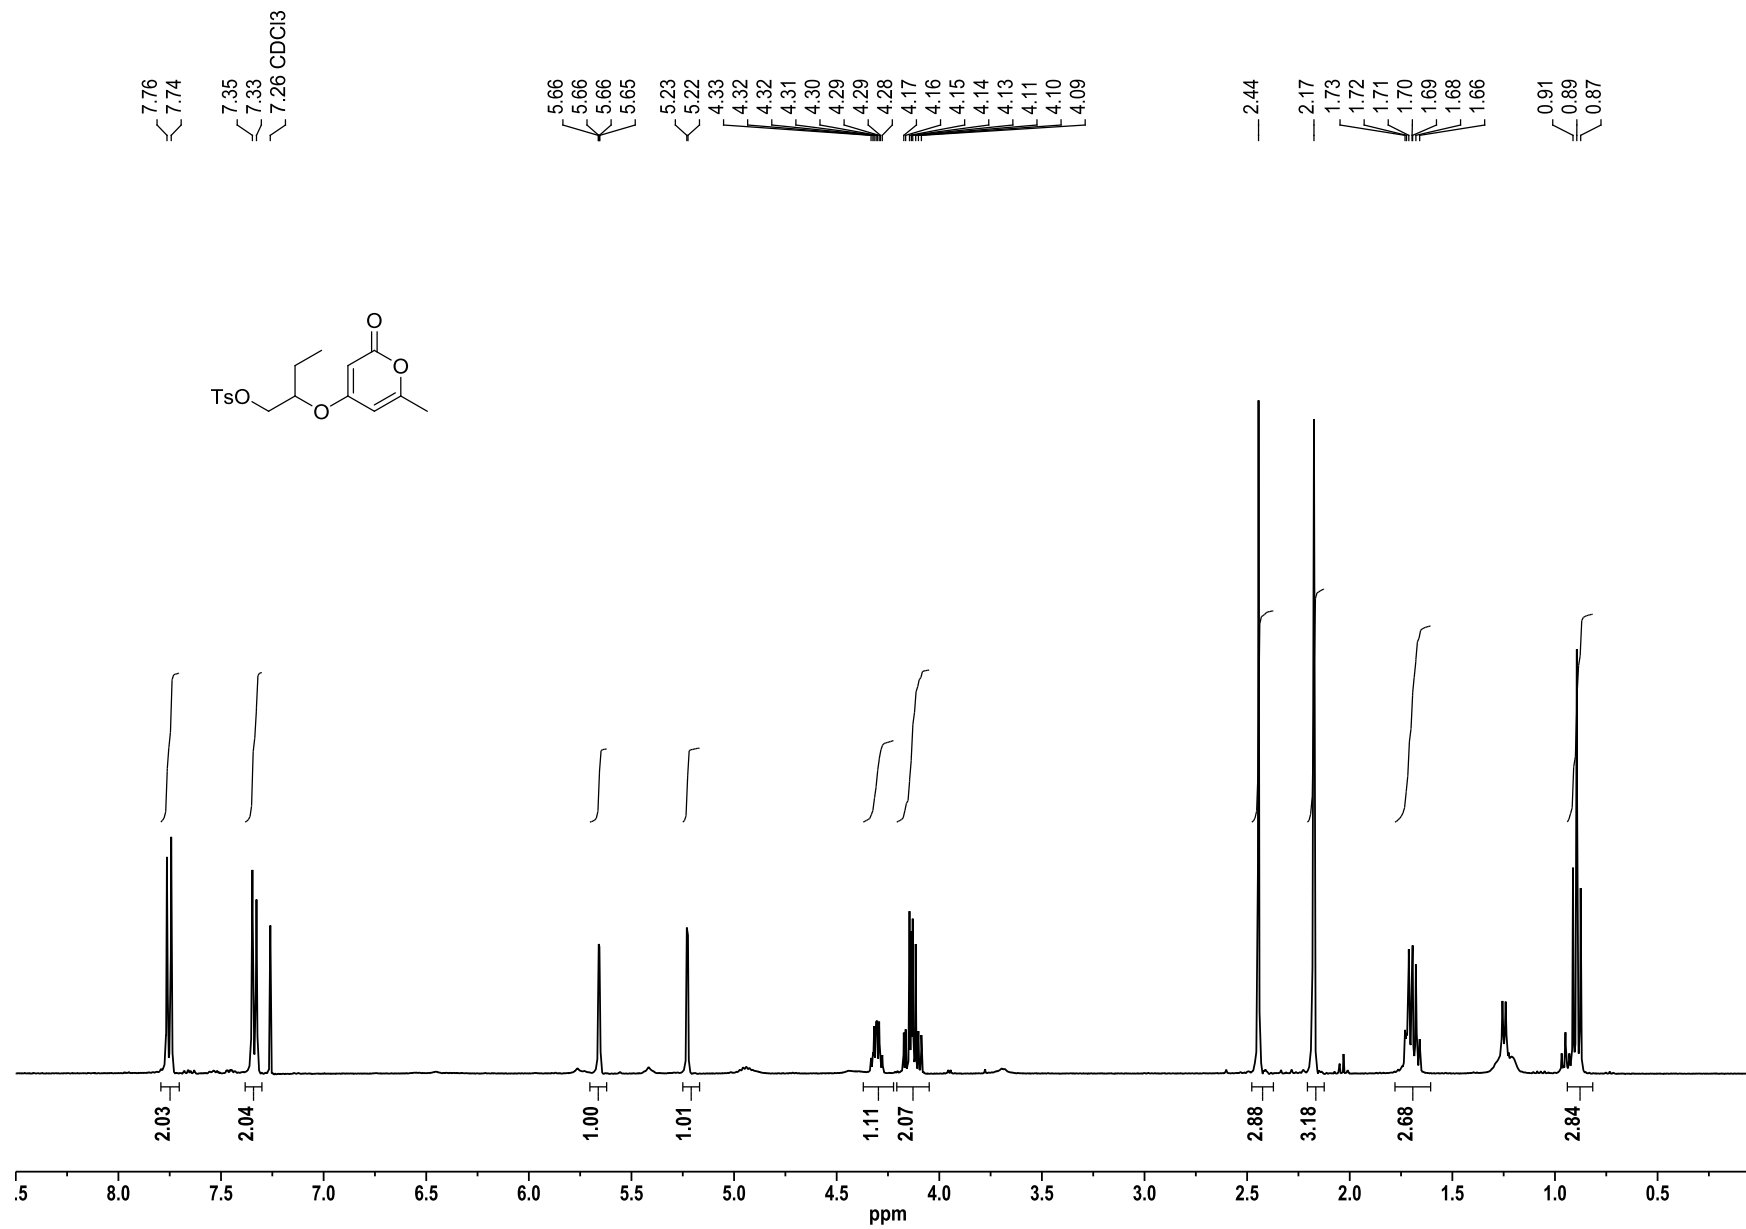

Figure S6 <sup>1</sup>H NMR spectrum of 4d.

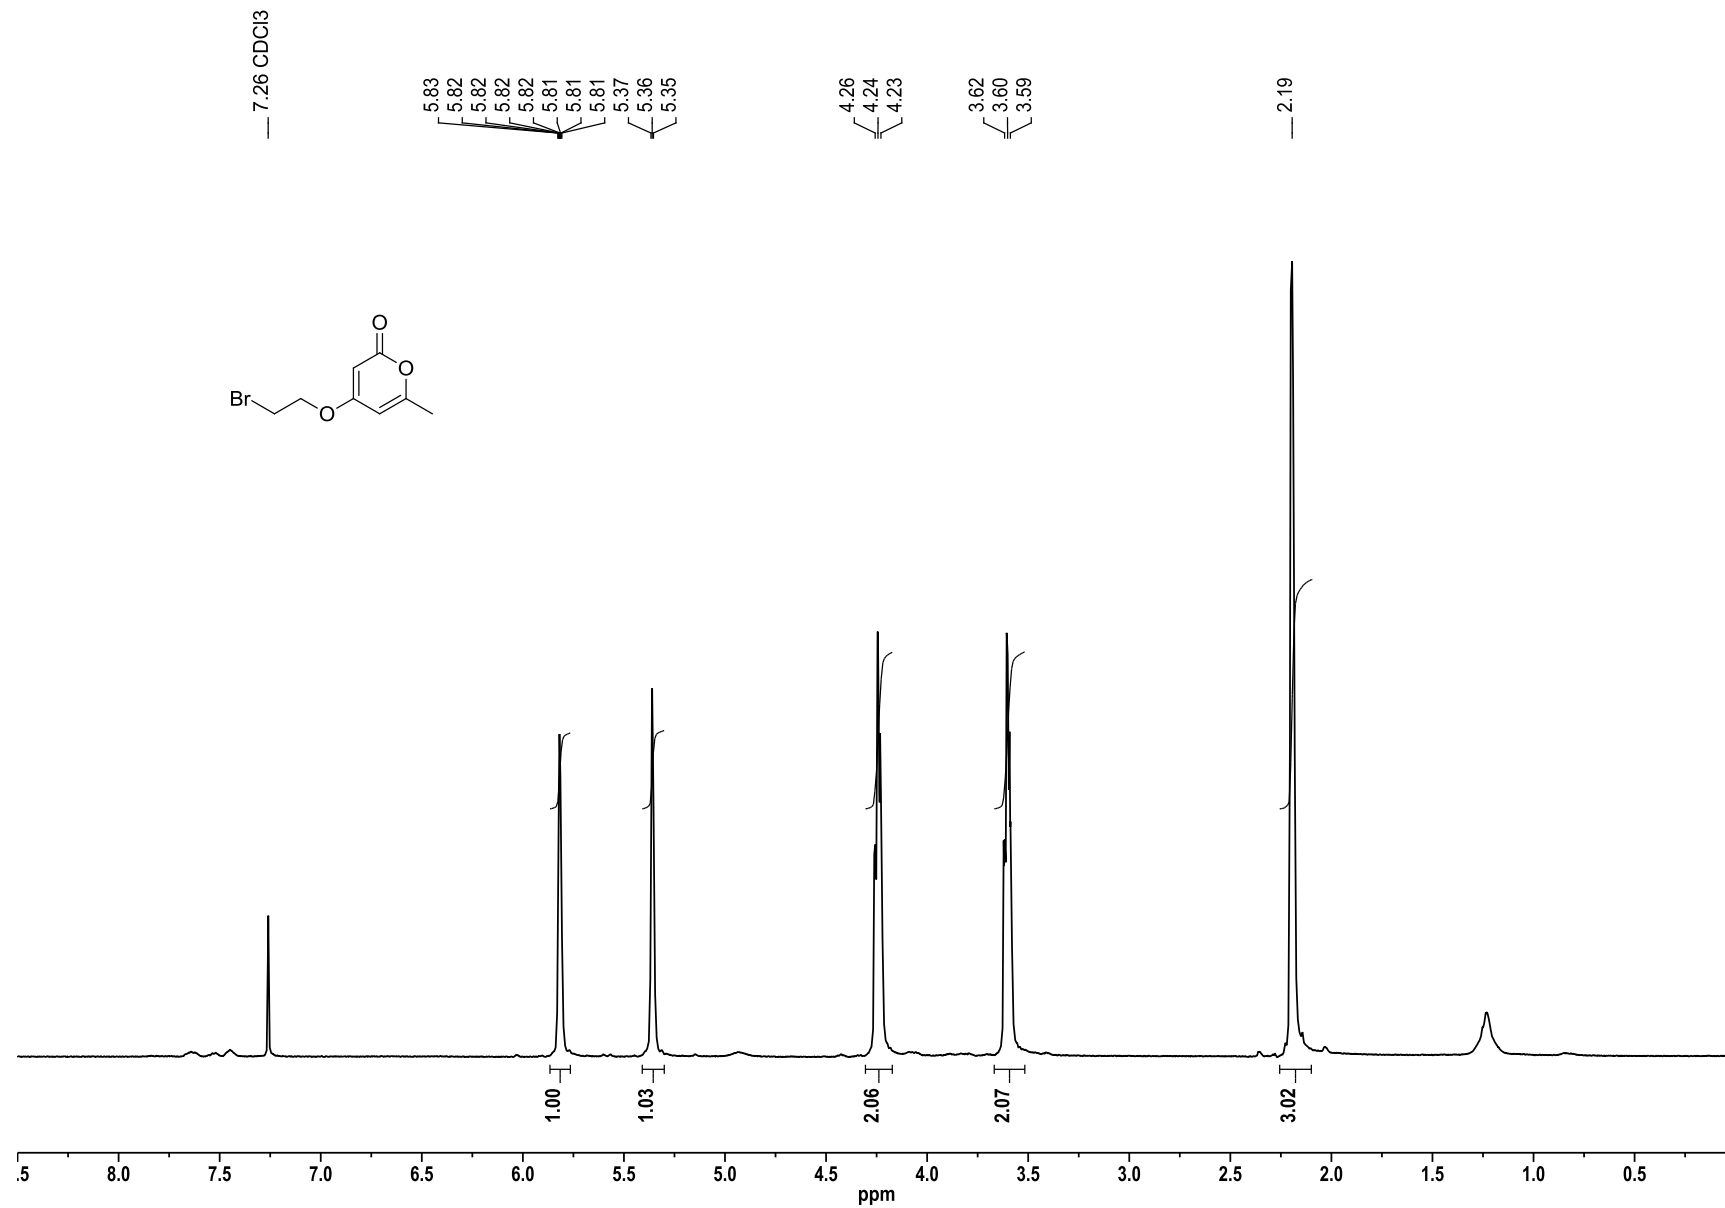

Figure S7 <sup>1</sup>H NMR spectrum of 4e.

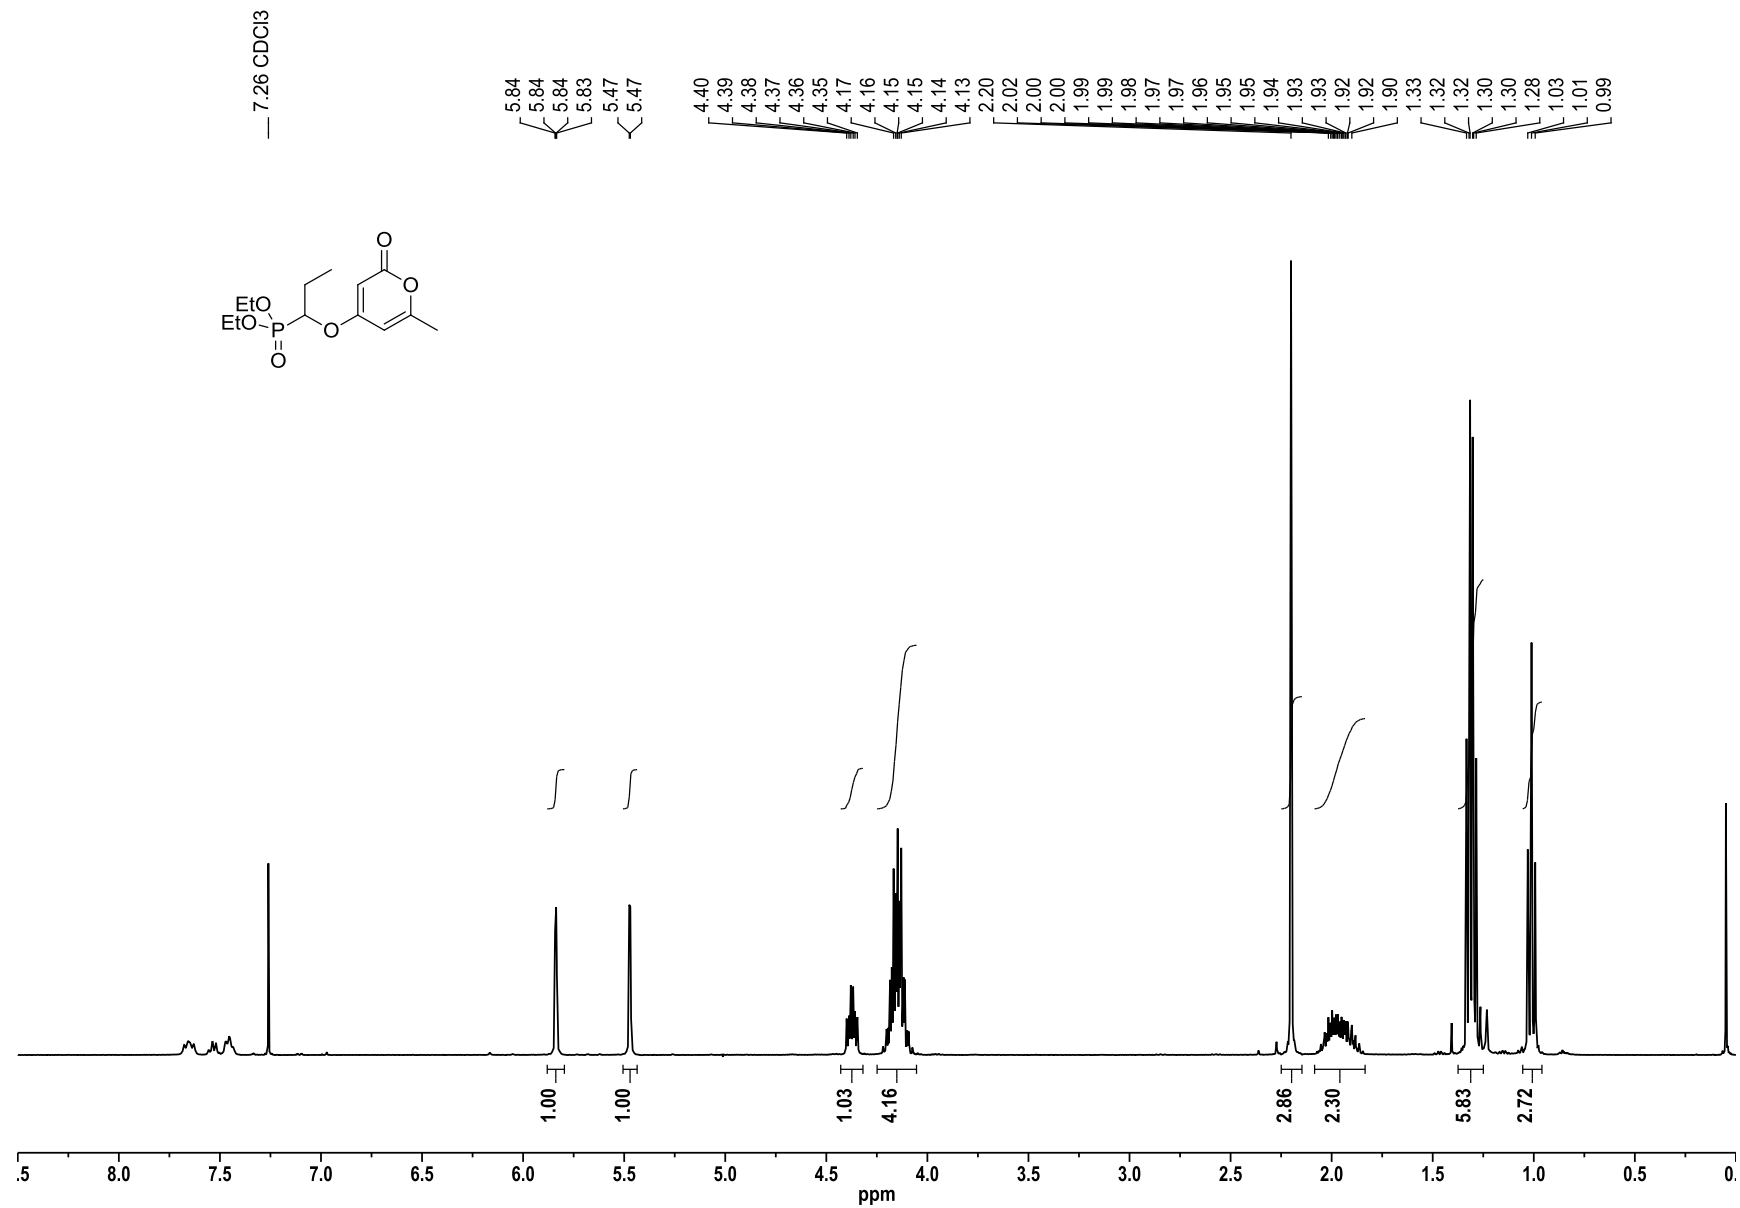

Figure S8 <sup>1</sup>H NMR spectrum of 4f.

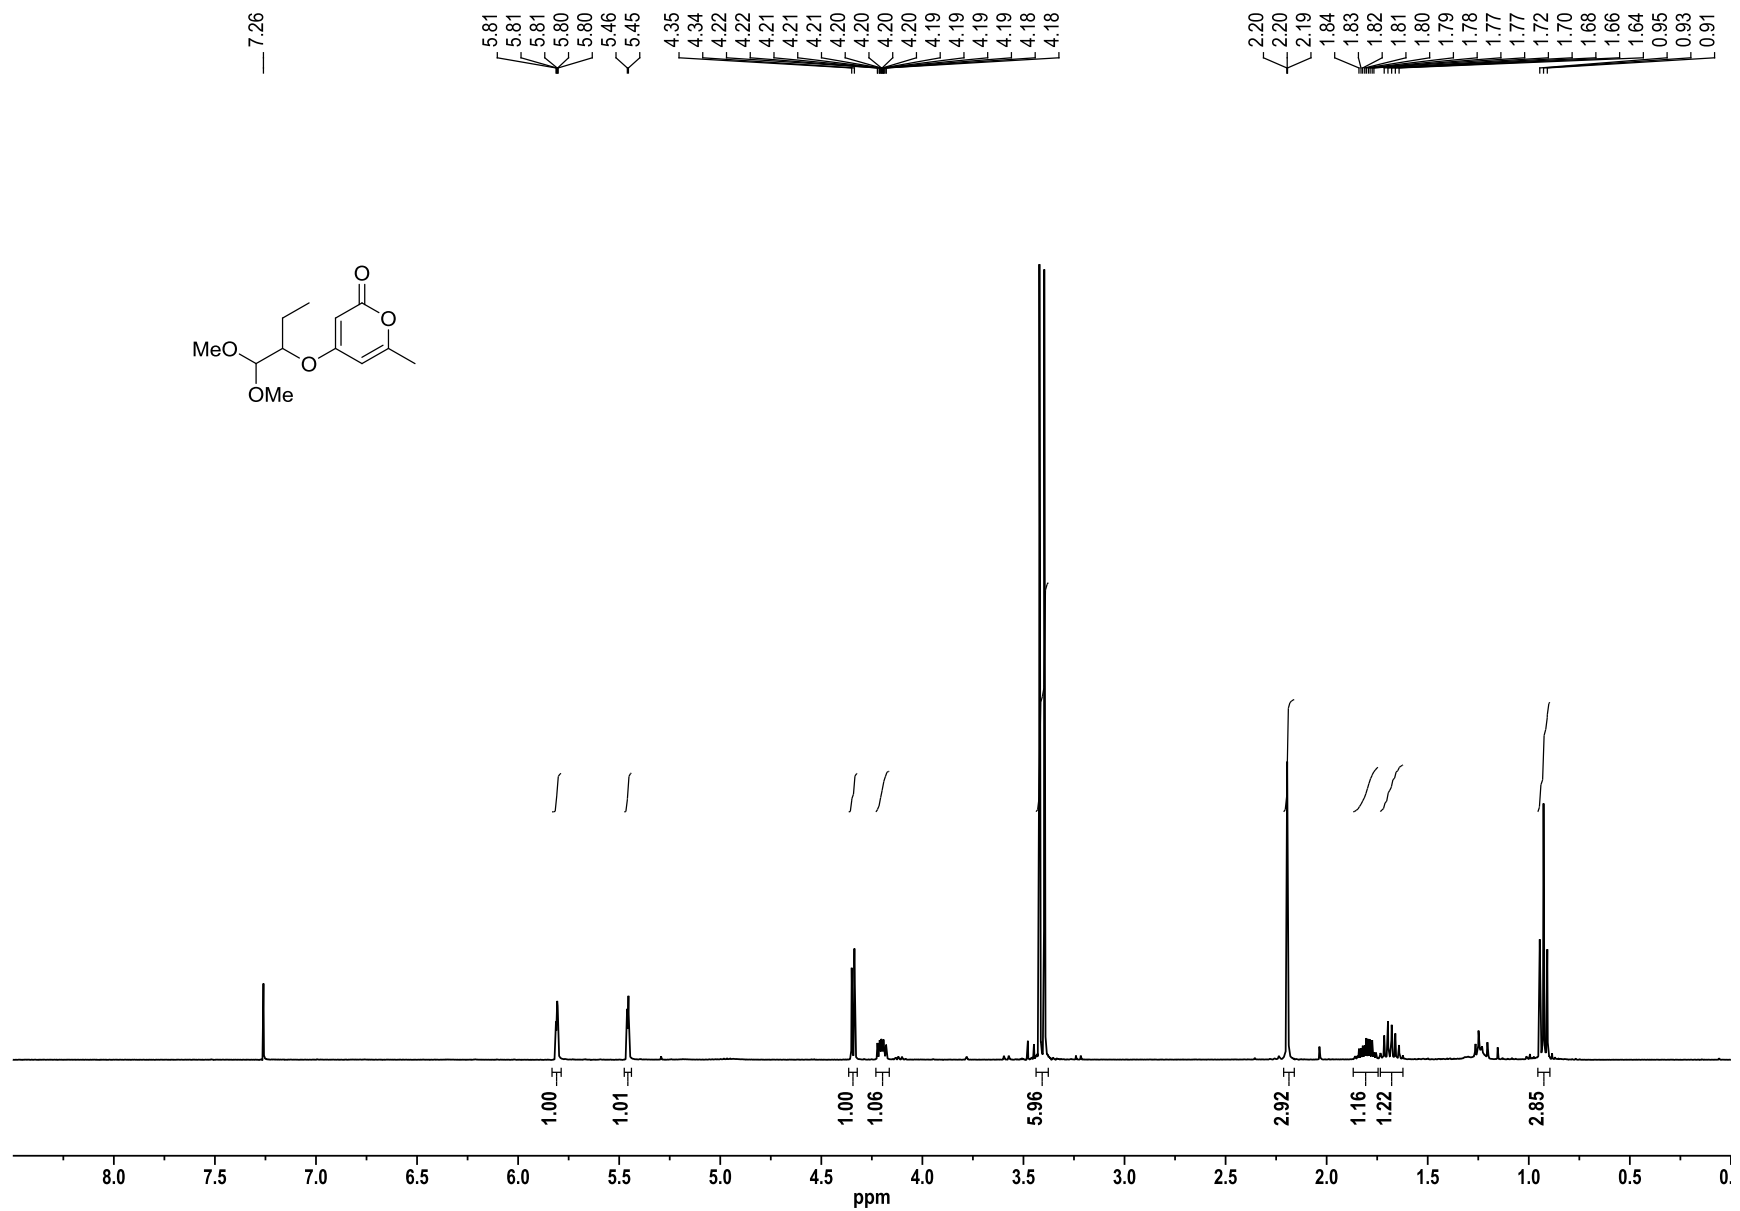

Figure S9 <sup>1</sup>H NMR spectrum of 4g.

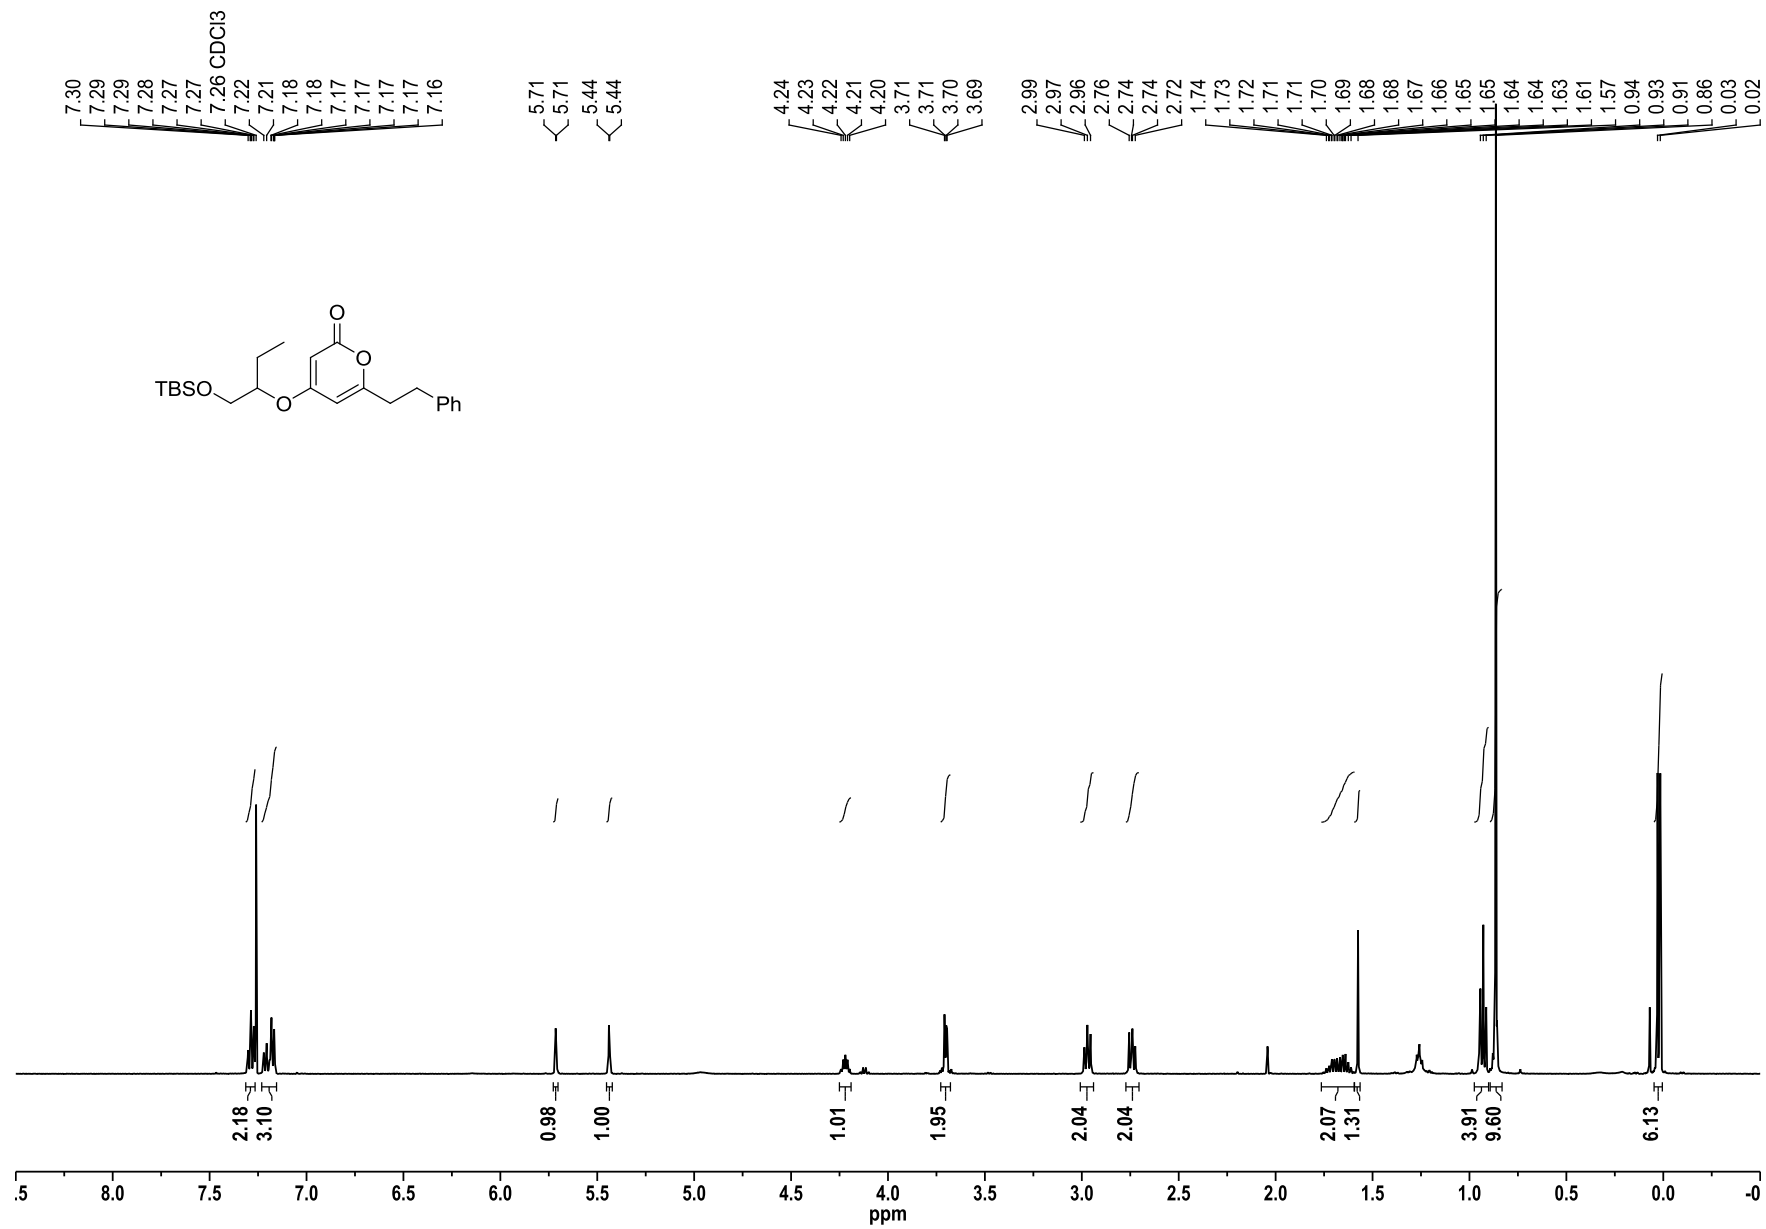

Figure S10 <sup>1</sup>H NMR spectrum of 4h.

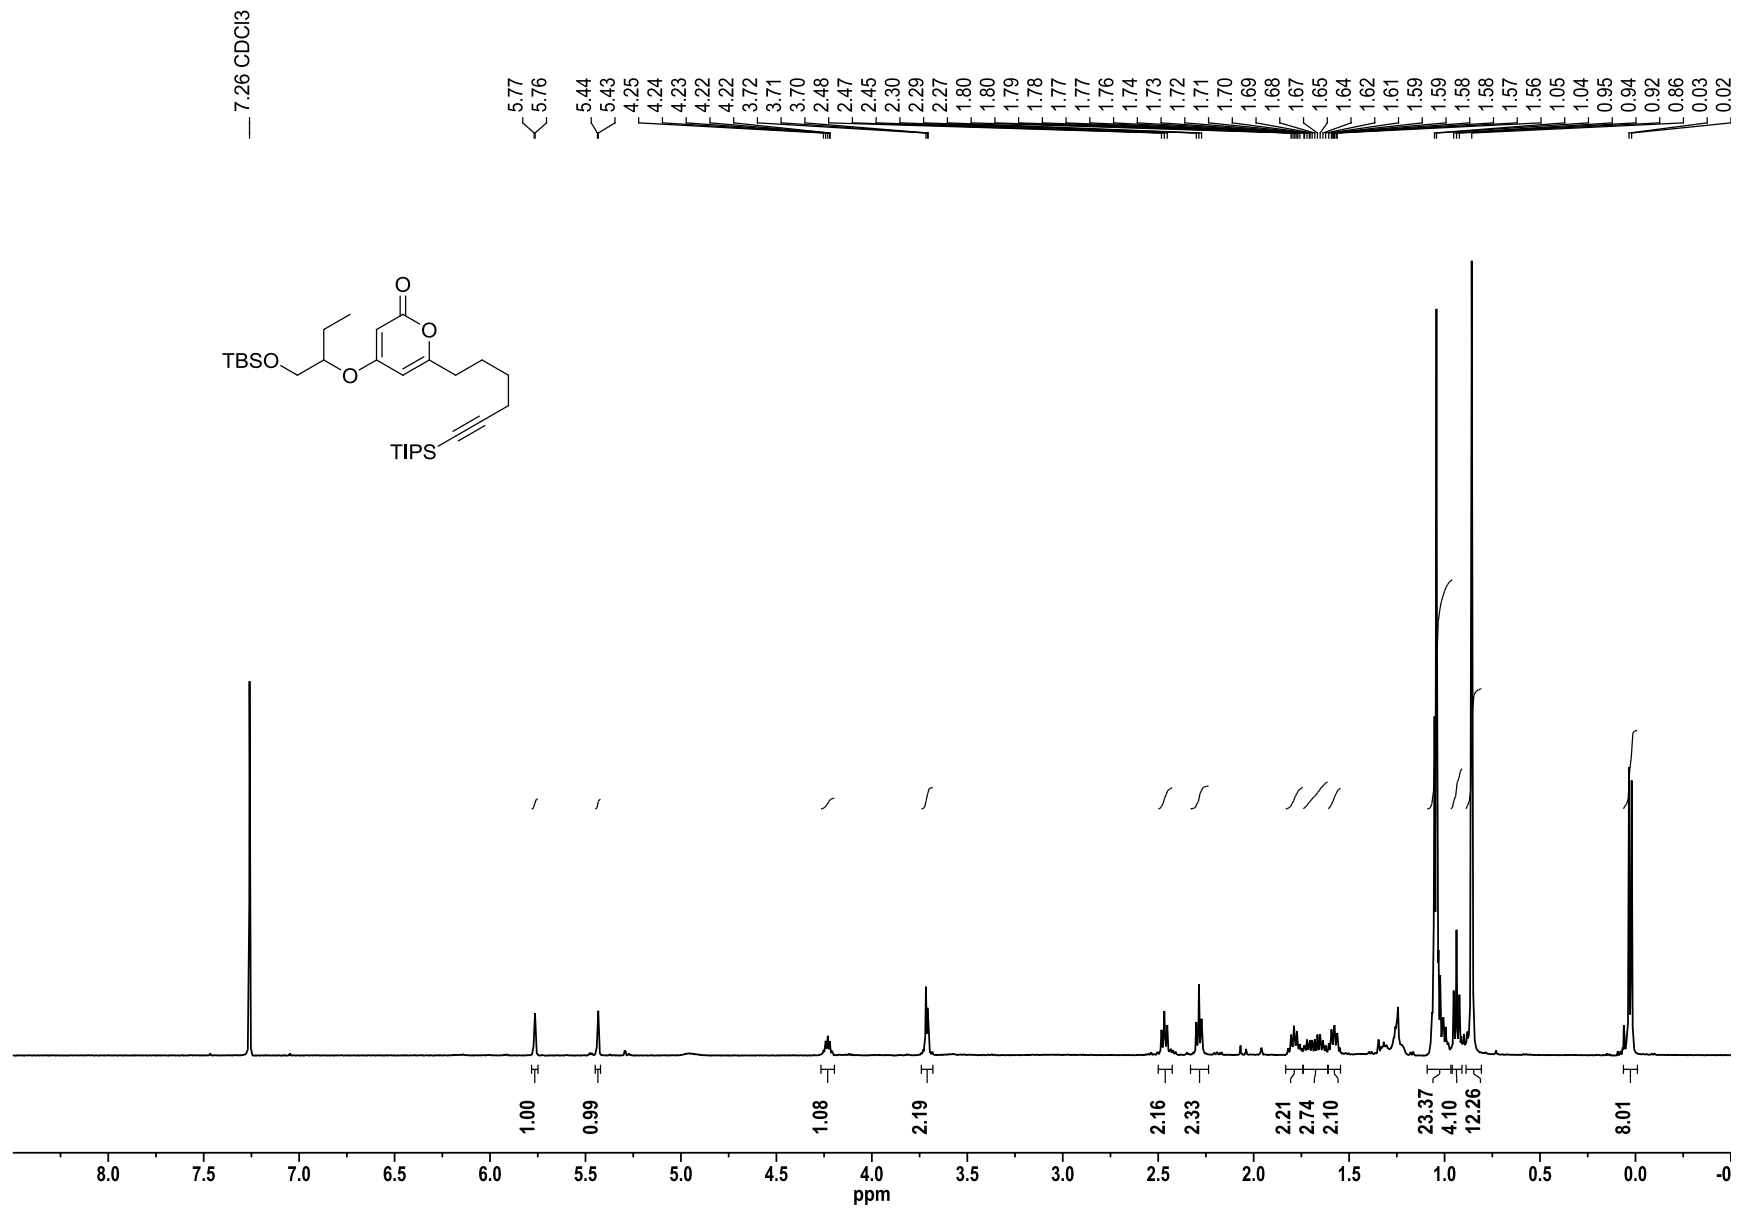

Figure S11 <sup>1</sup>H NMR spectrum of 4i.

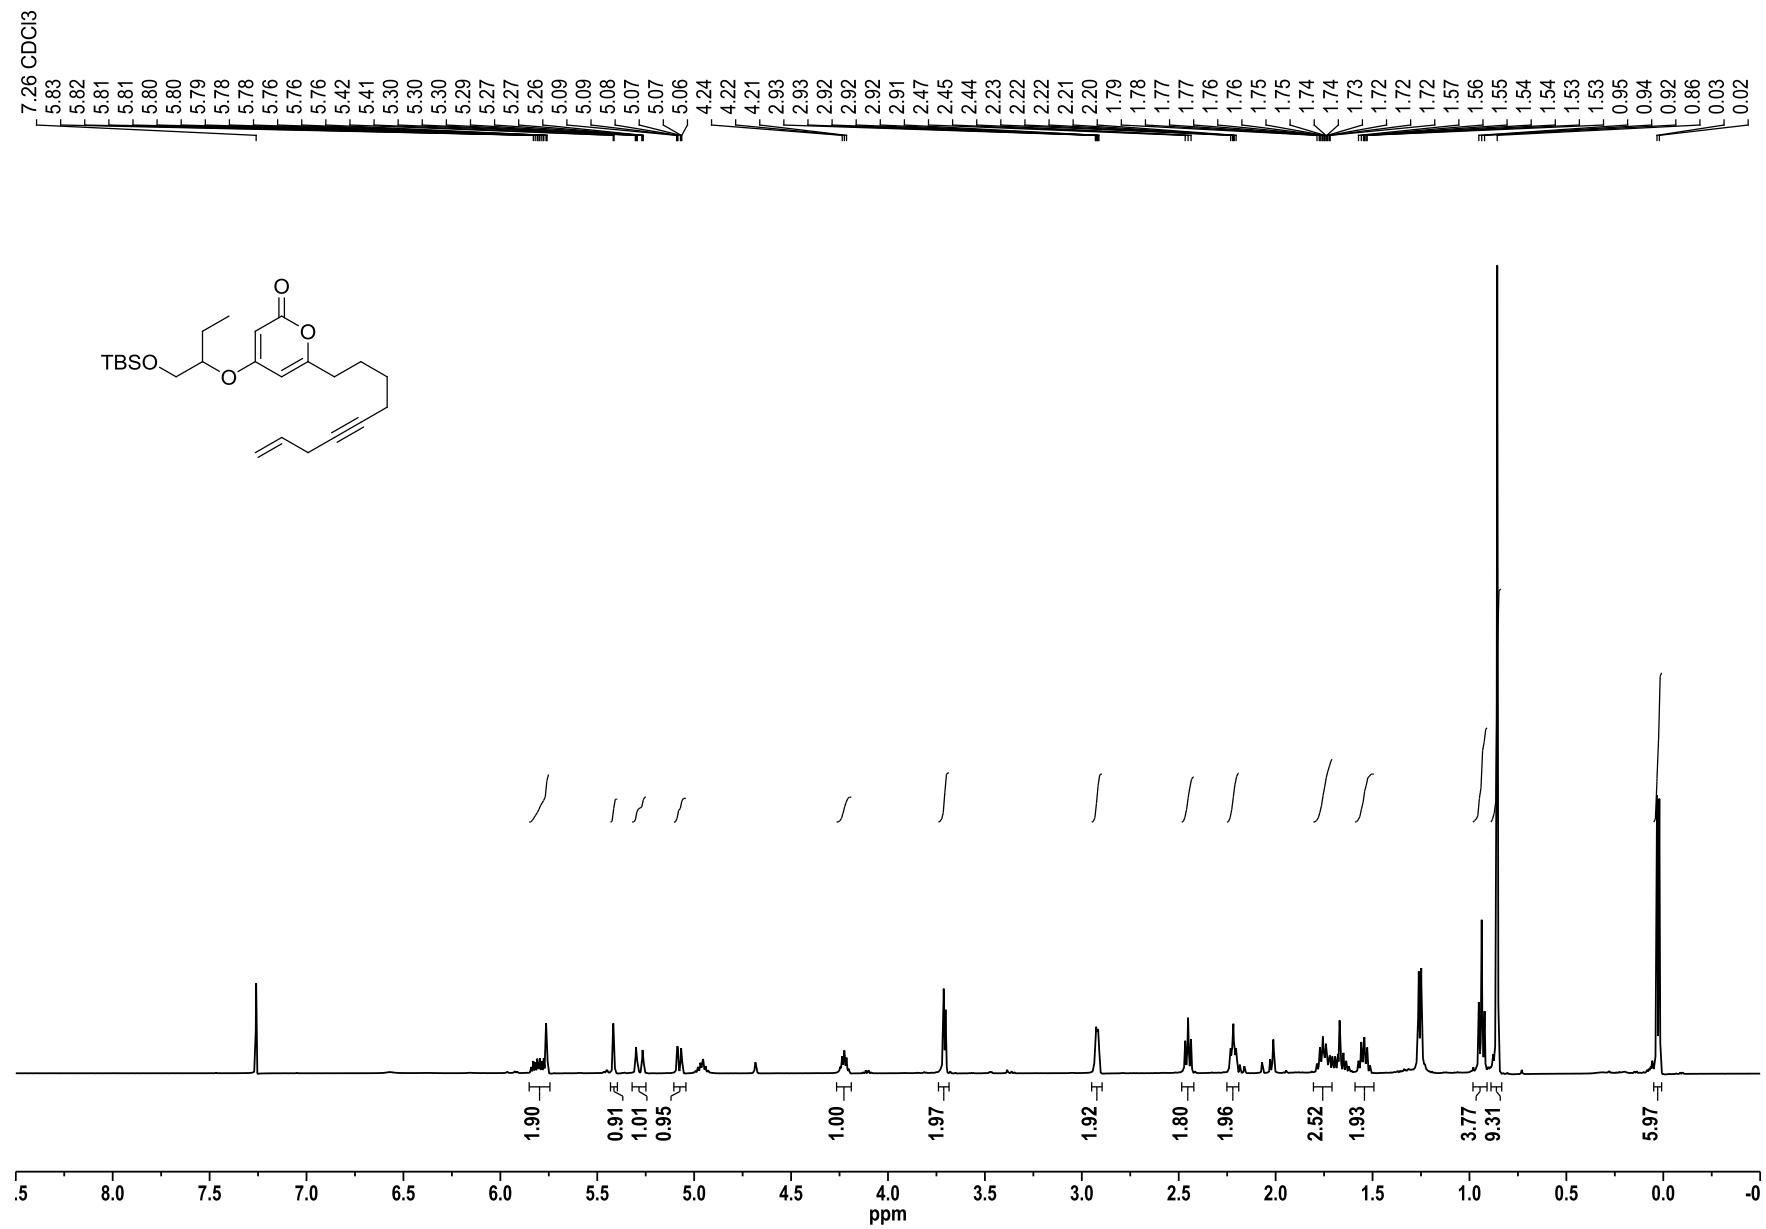

Figure S12 <sup>1</sup>H NMR spectrum of 4j.

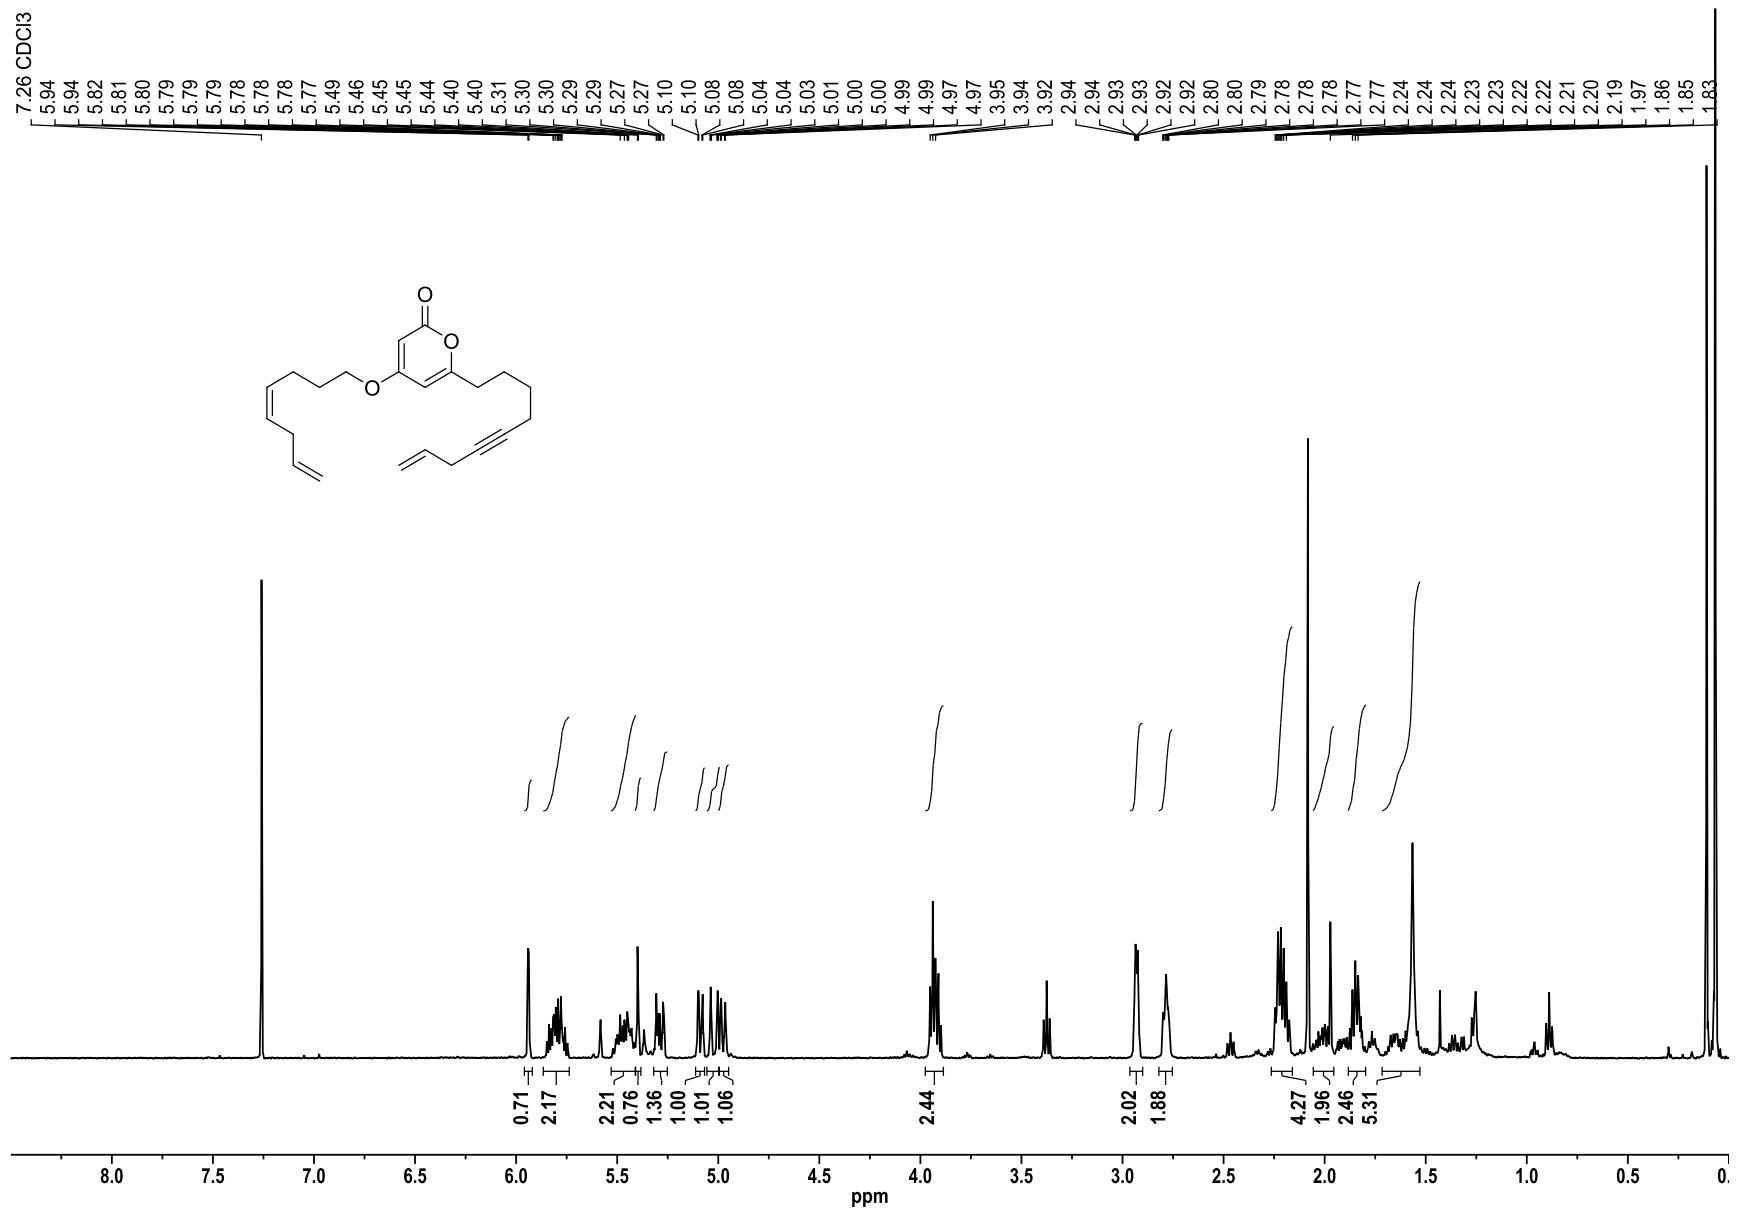

Figure S13 <sup>1</sup>H NMR spectrum of 4k.



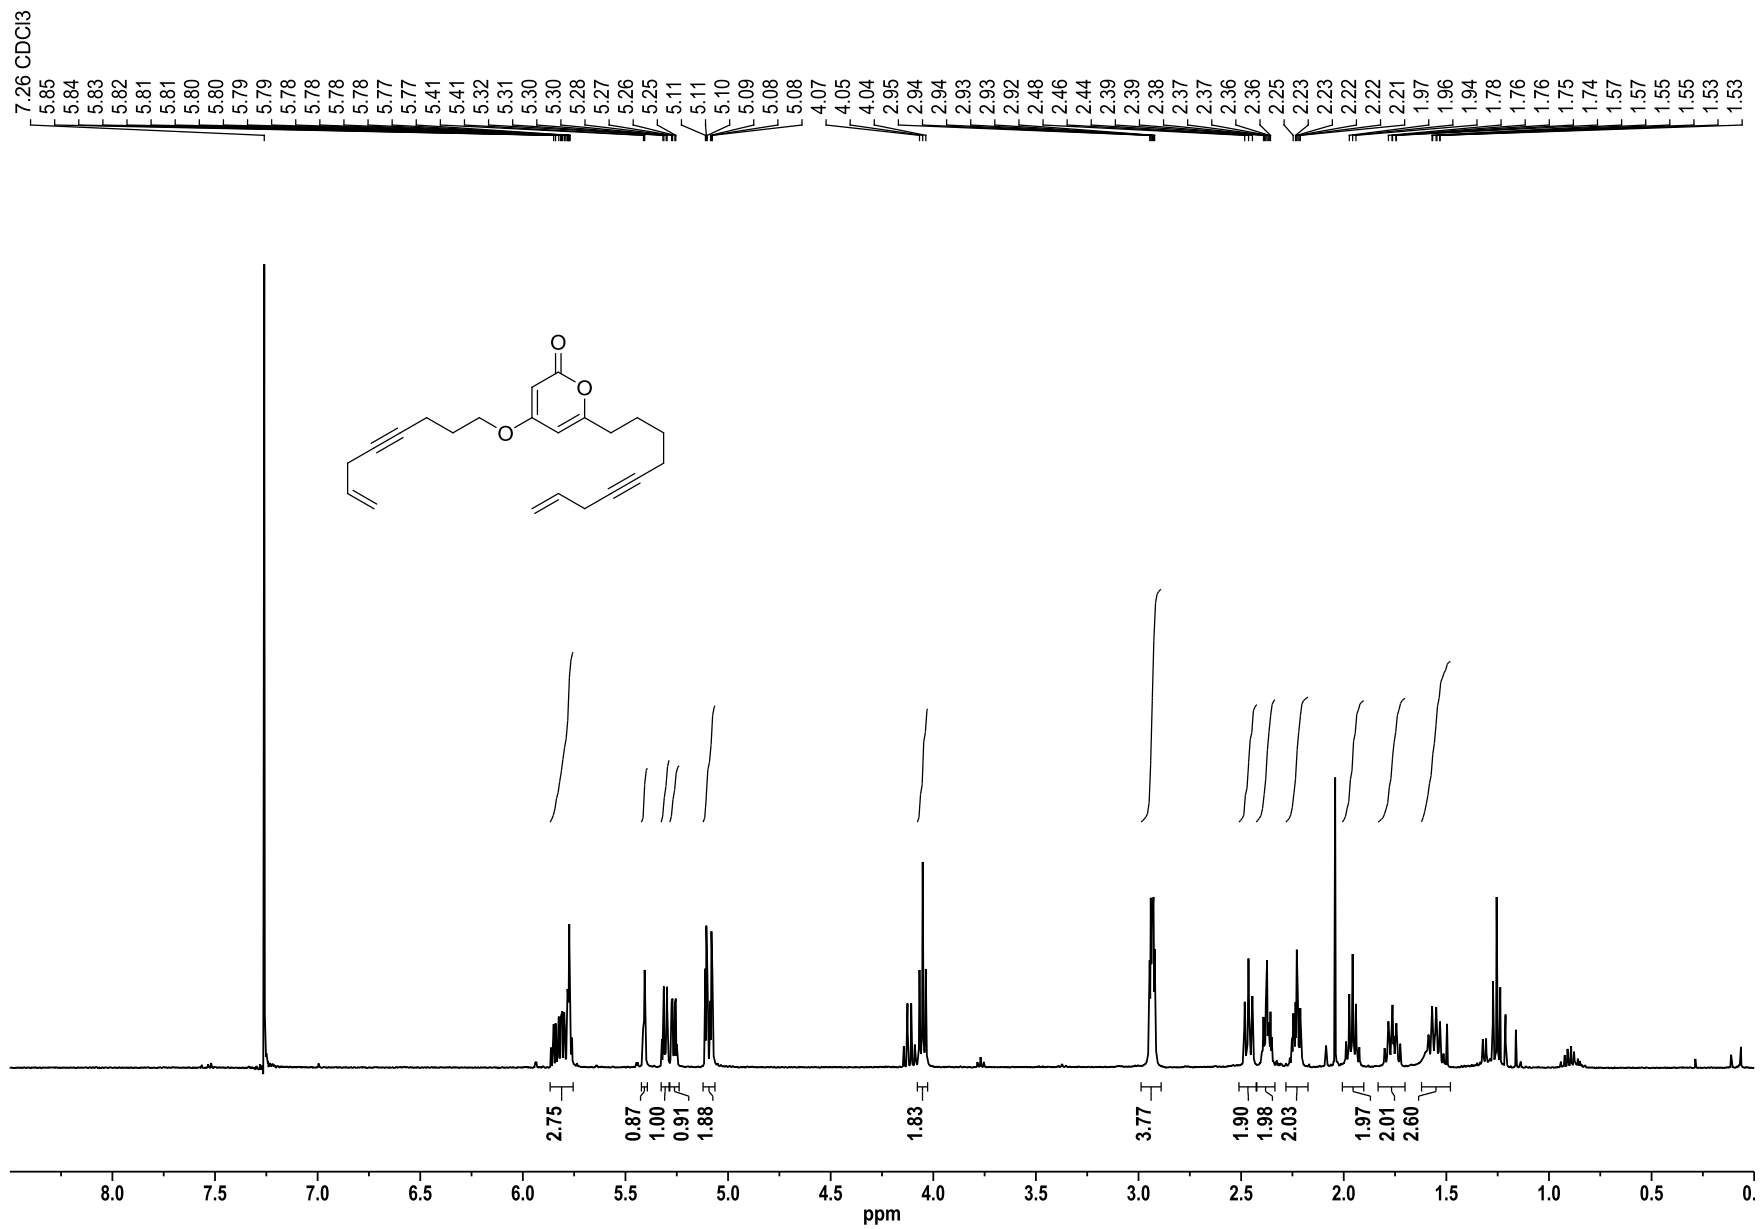

Figure S14 <sup>1</sup>H NMR spectrum of 4l.

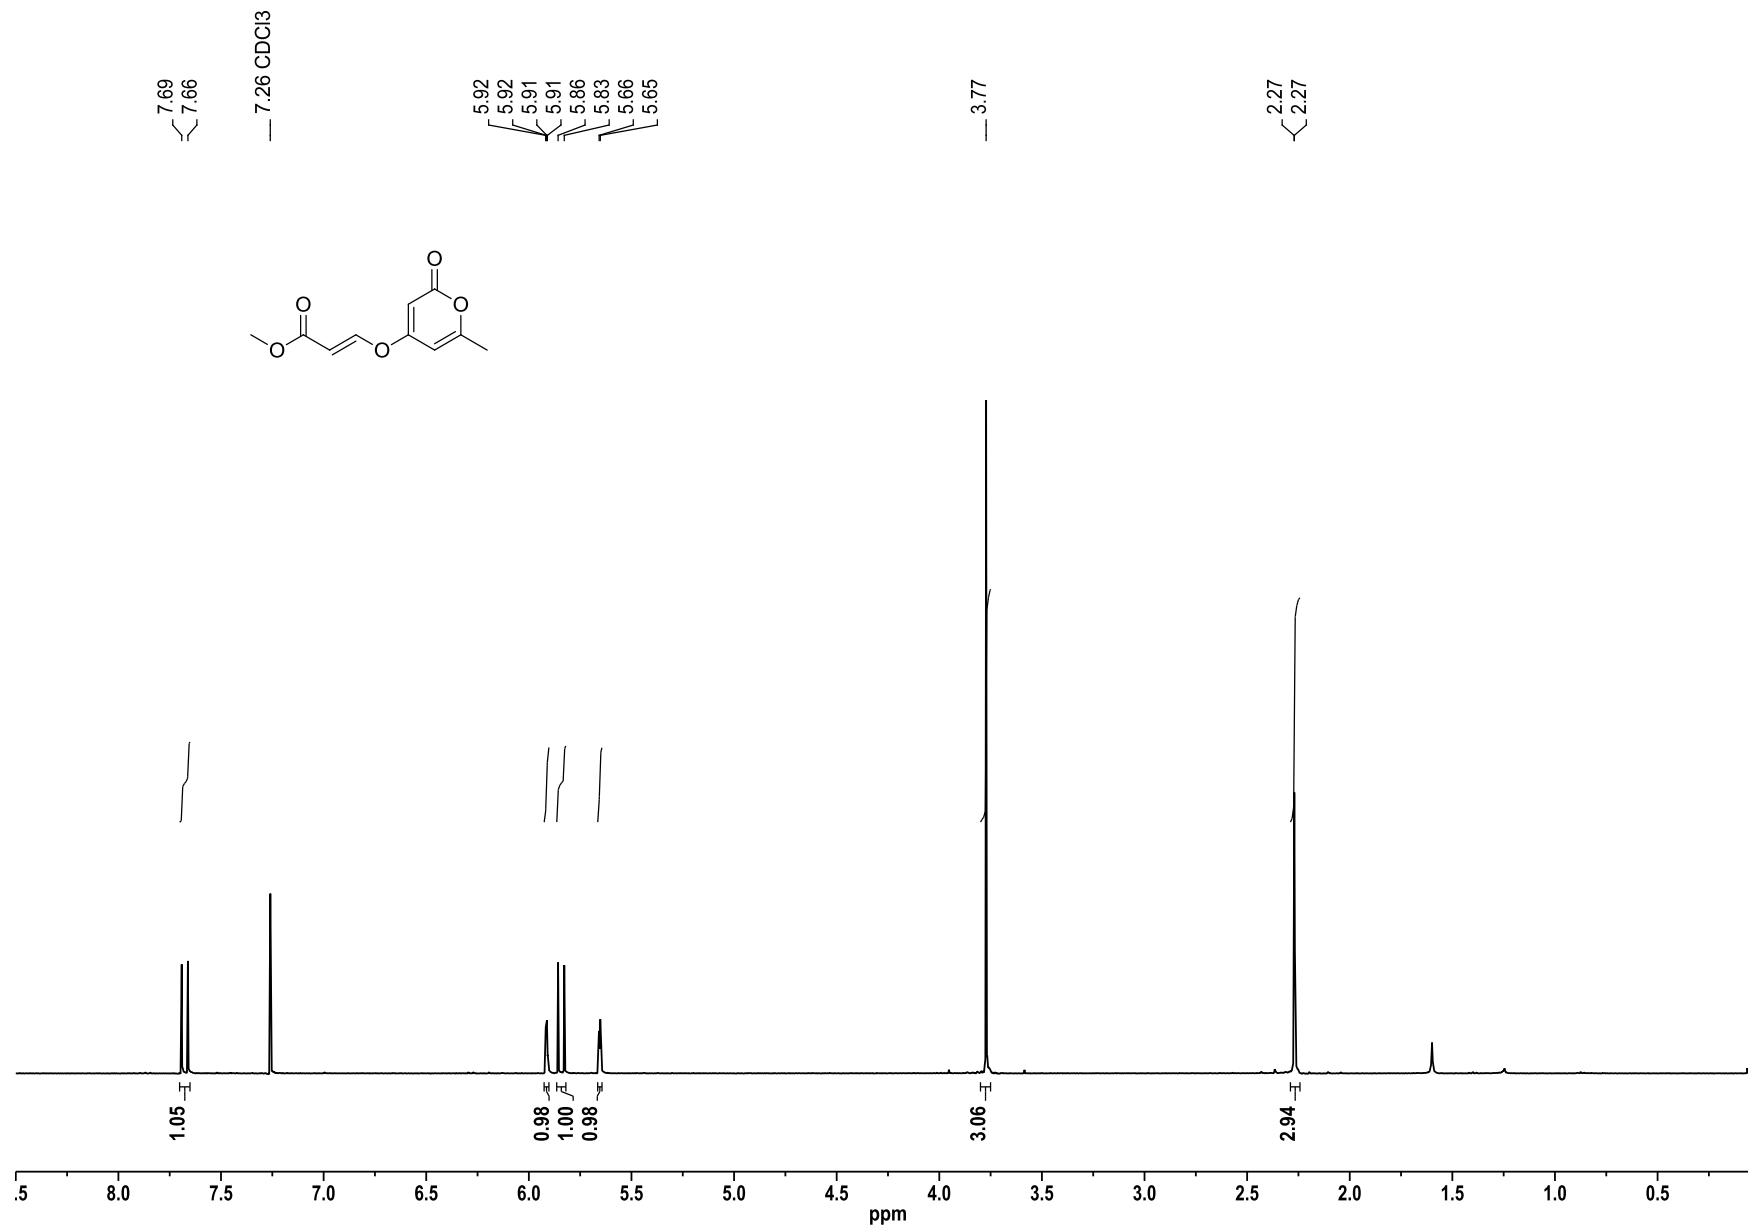

Figure S15 <sup>1</sup>H NMR spectrum of 7a.

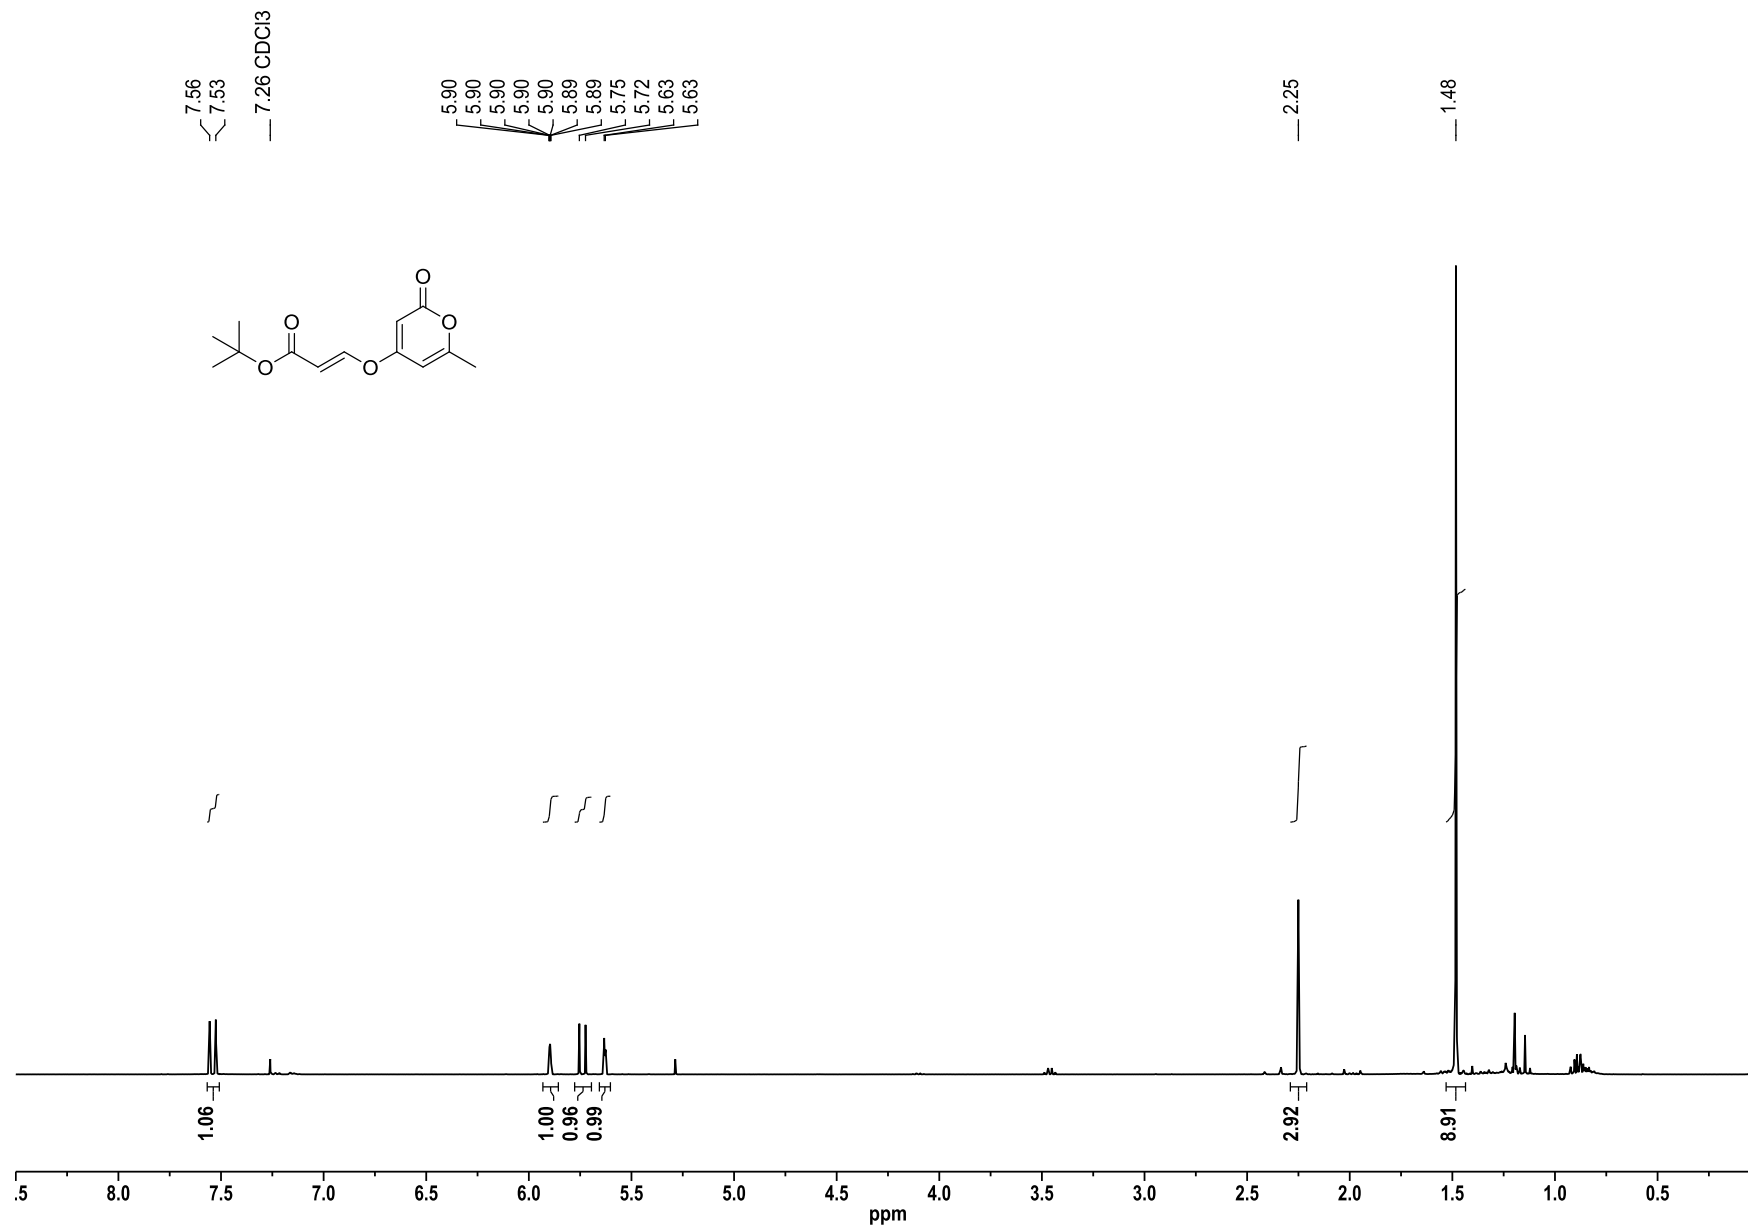

Figure S16 <sup>1</sup>H NMR spectrum of 7b.

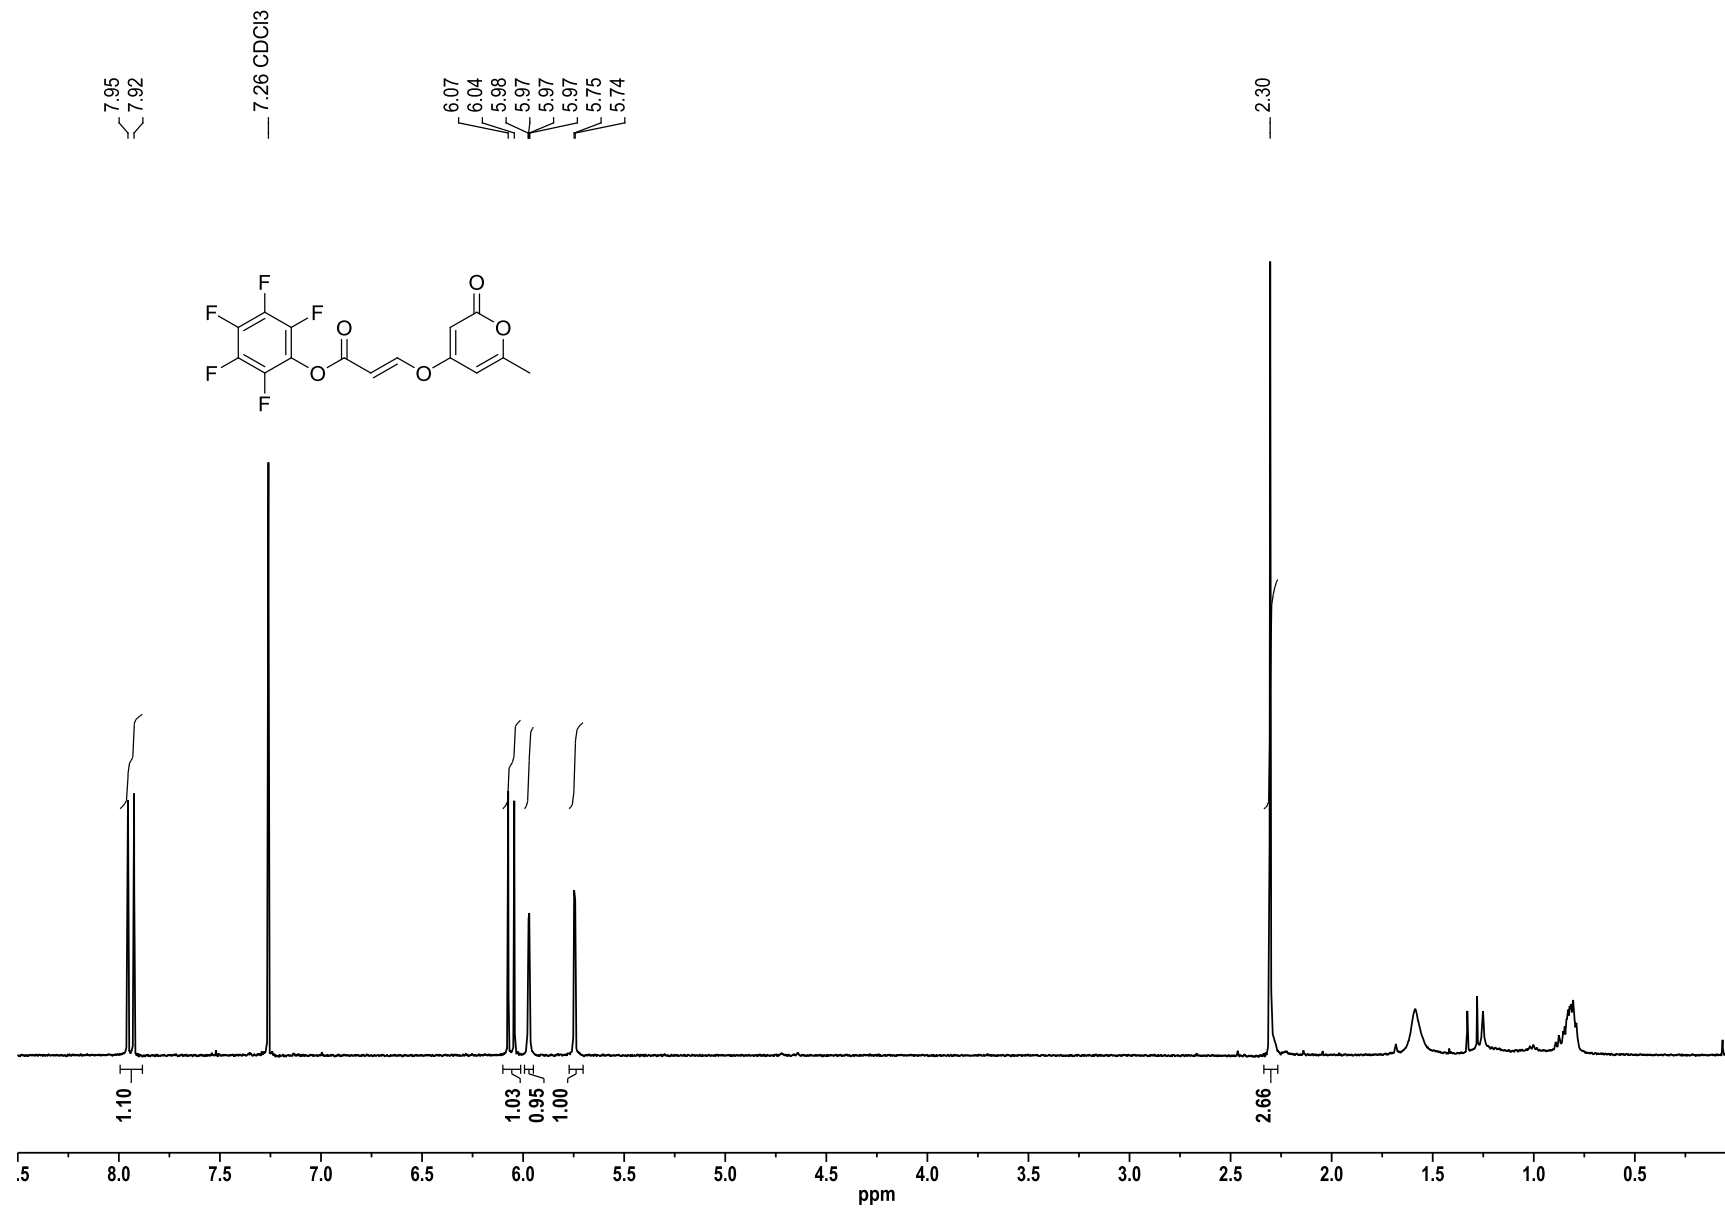

Figure S17 <sup>1</sup>H NMR spectrum of 7c.

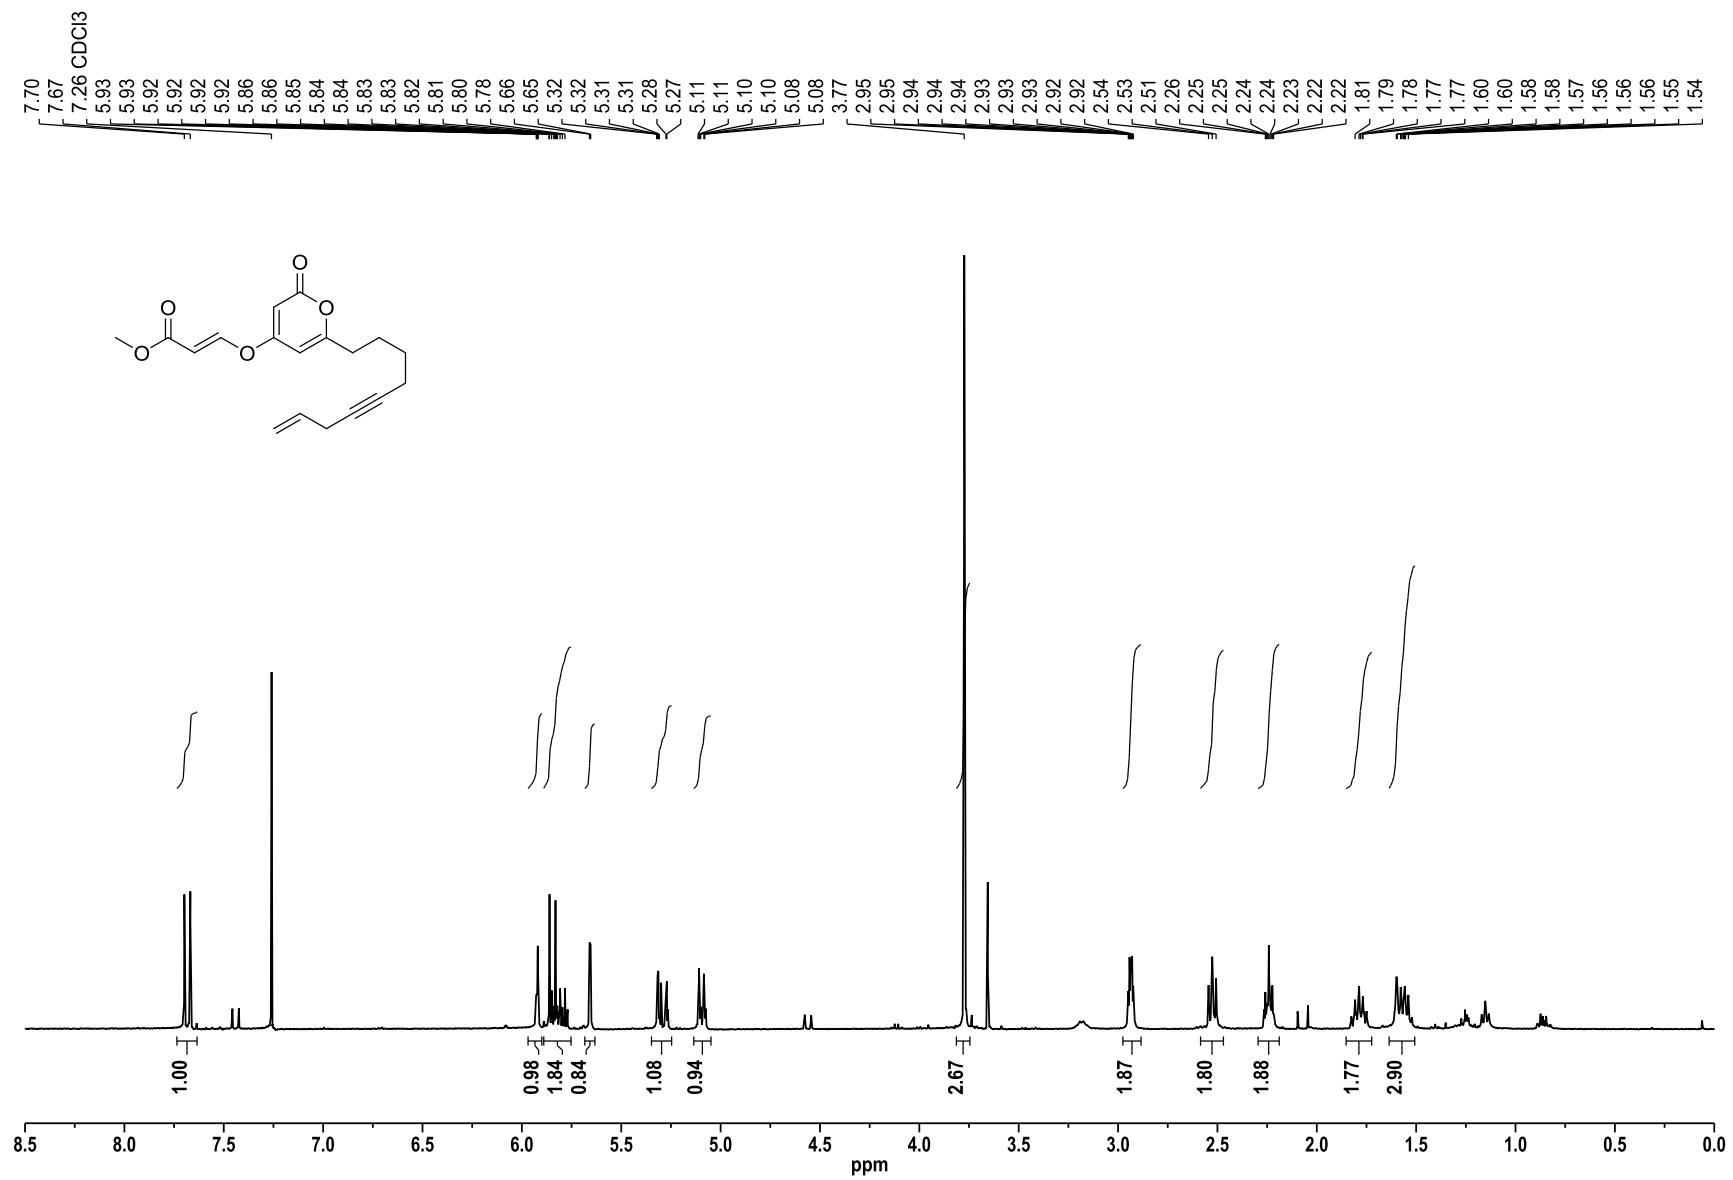

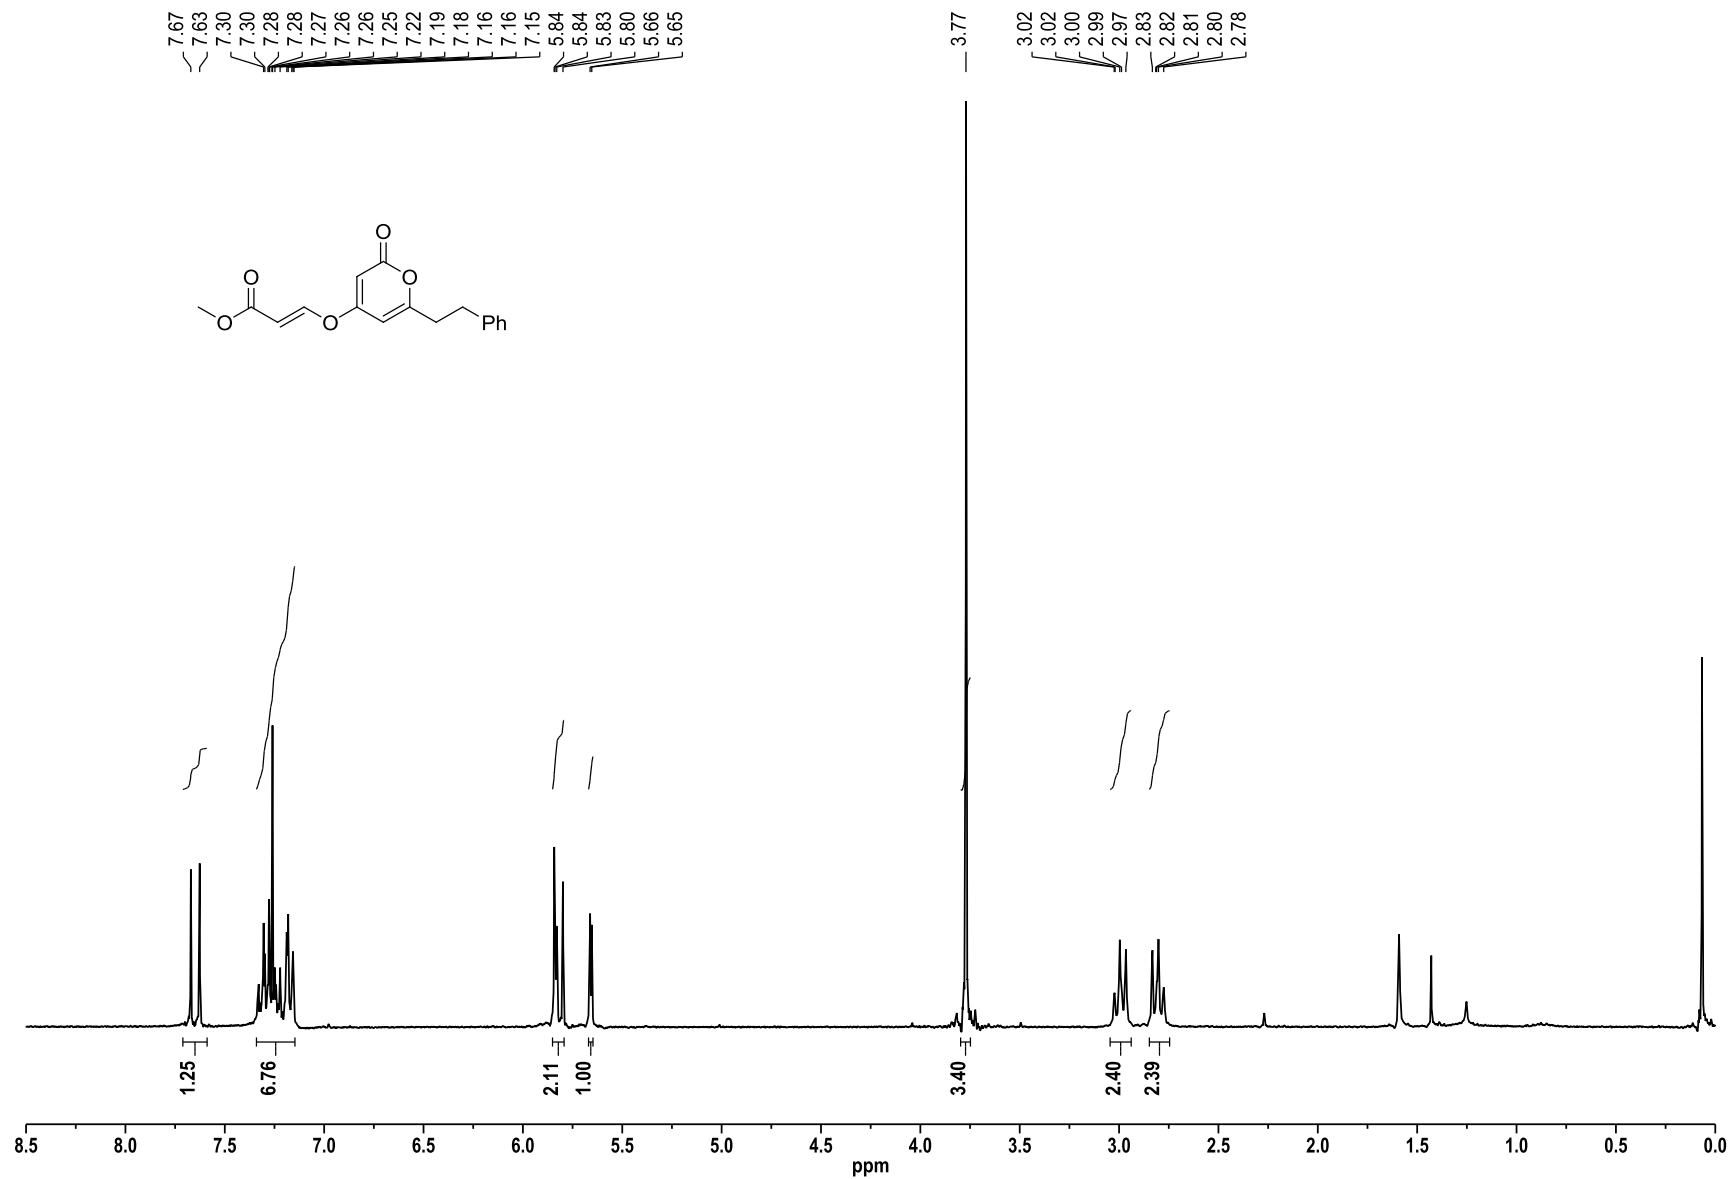

Figure S19 <sup>1</sup>H NMR spectrum of 7f.

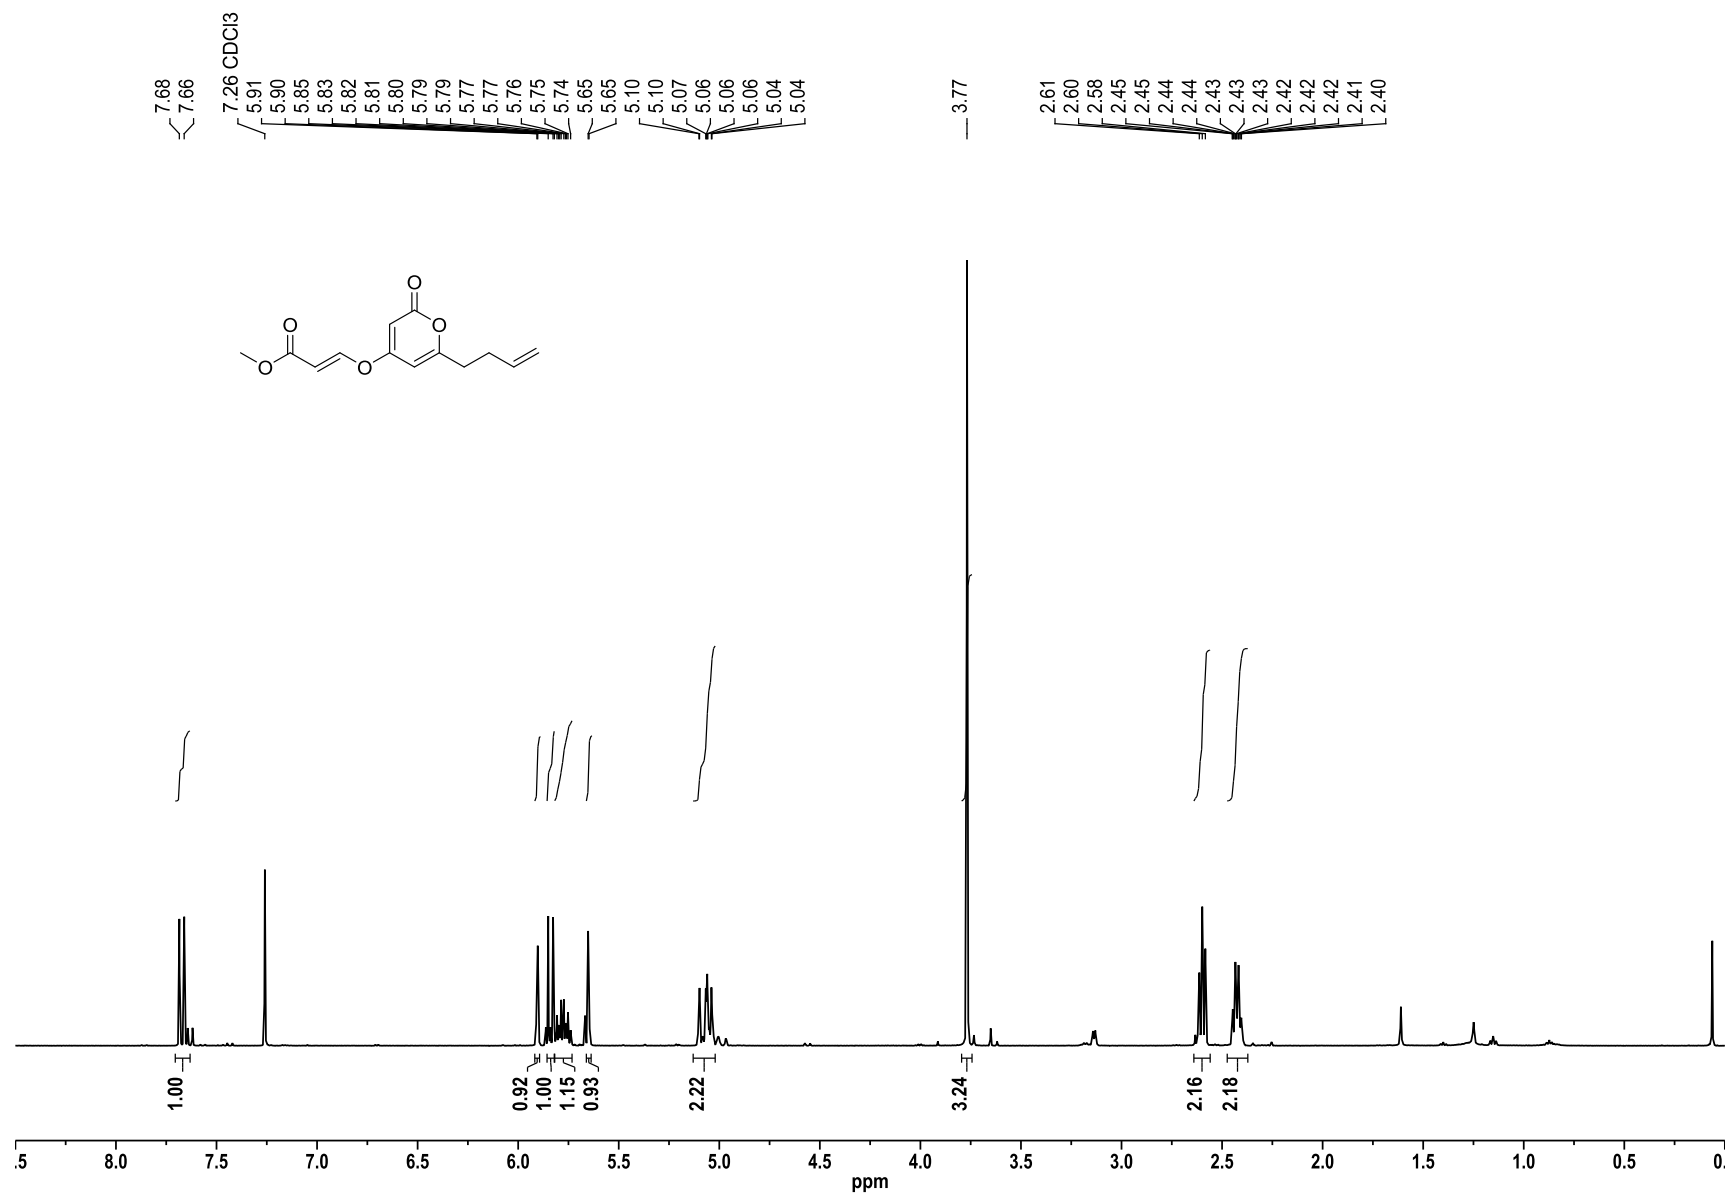

Figure S20 <sup>1</sup>H NMR spectrum of 7g.

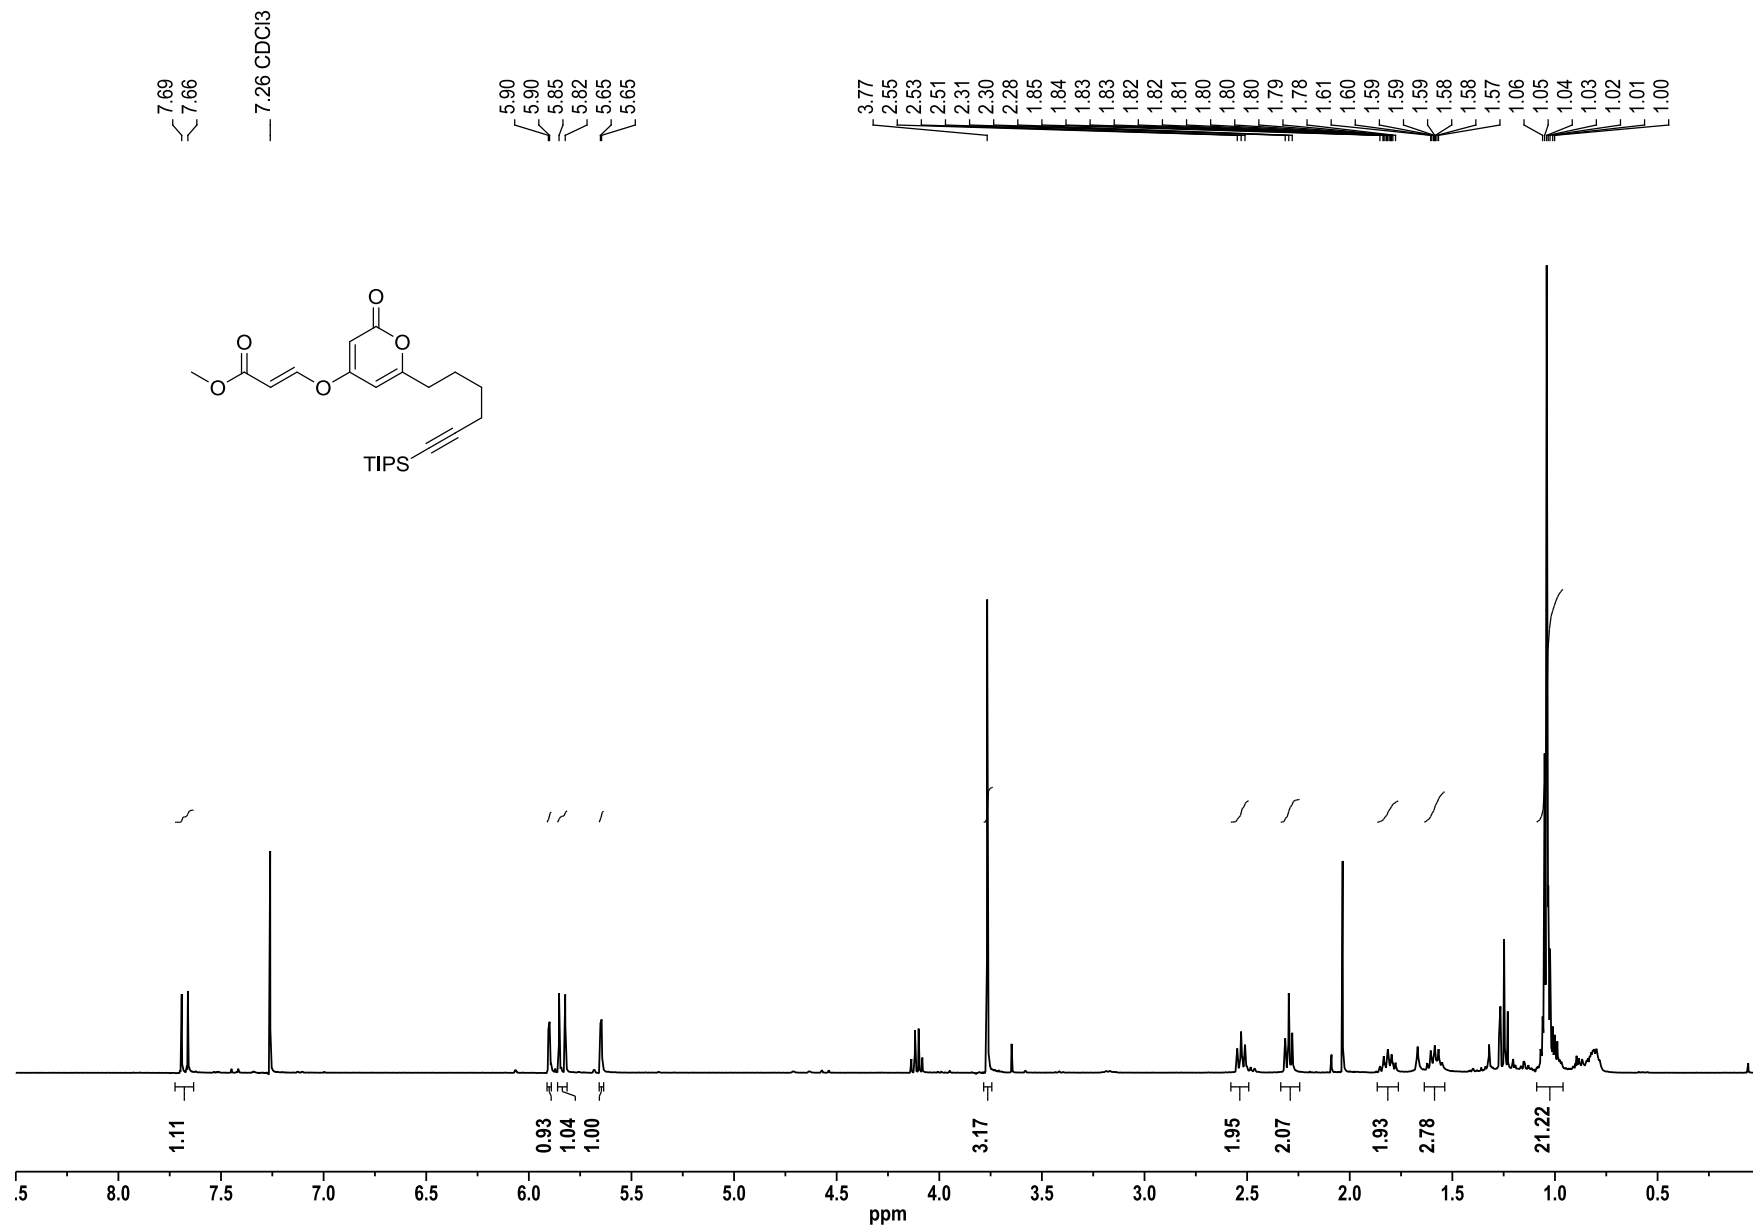

Figure S21 <sup>1</sup>H NMR spectrum of 7h.



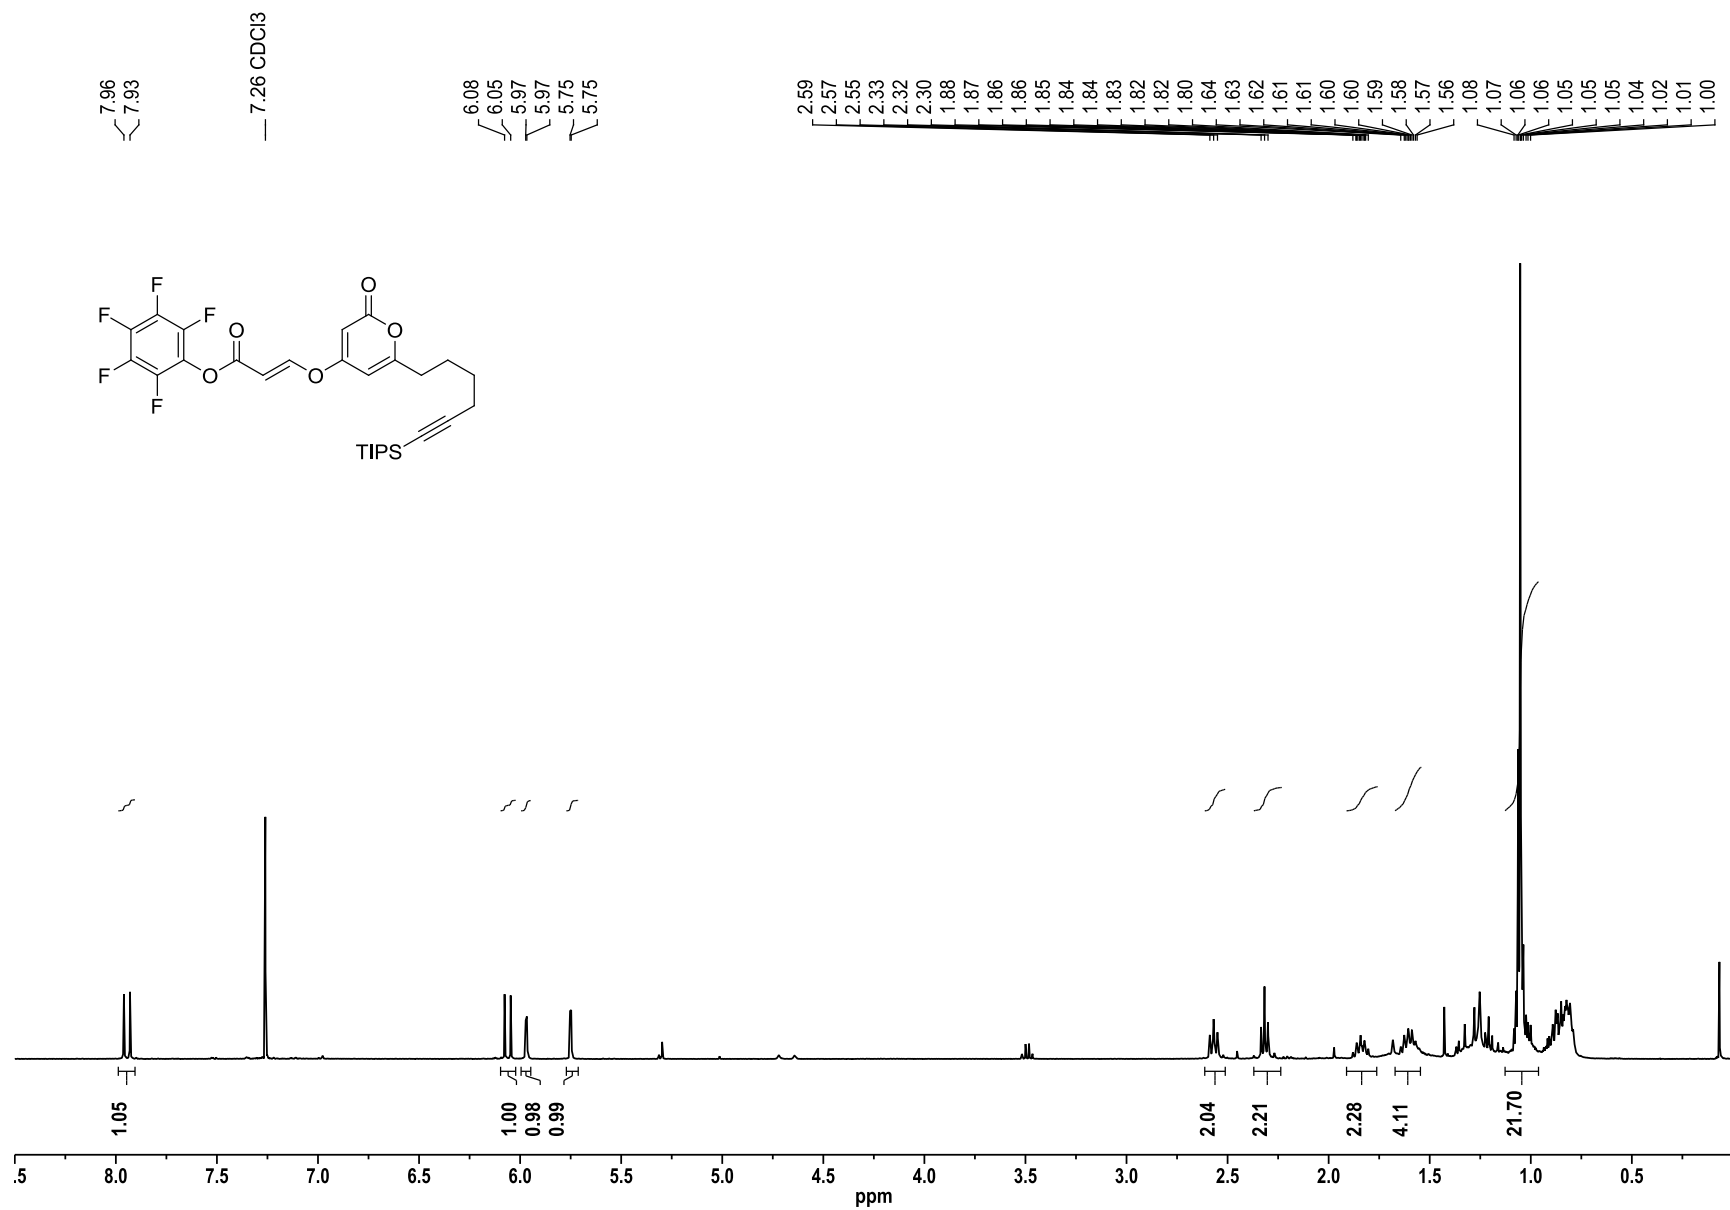

Figure S22 <sup>1</sup>H NMR spectrum of **7i**.

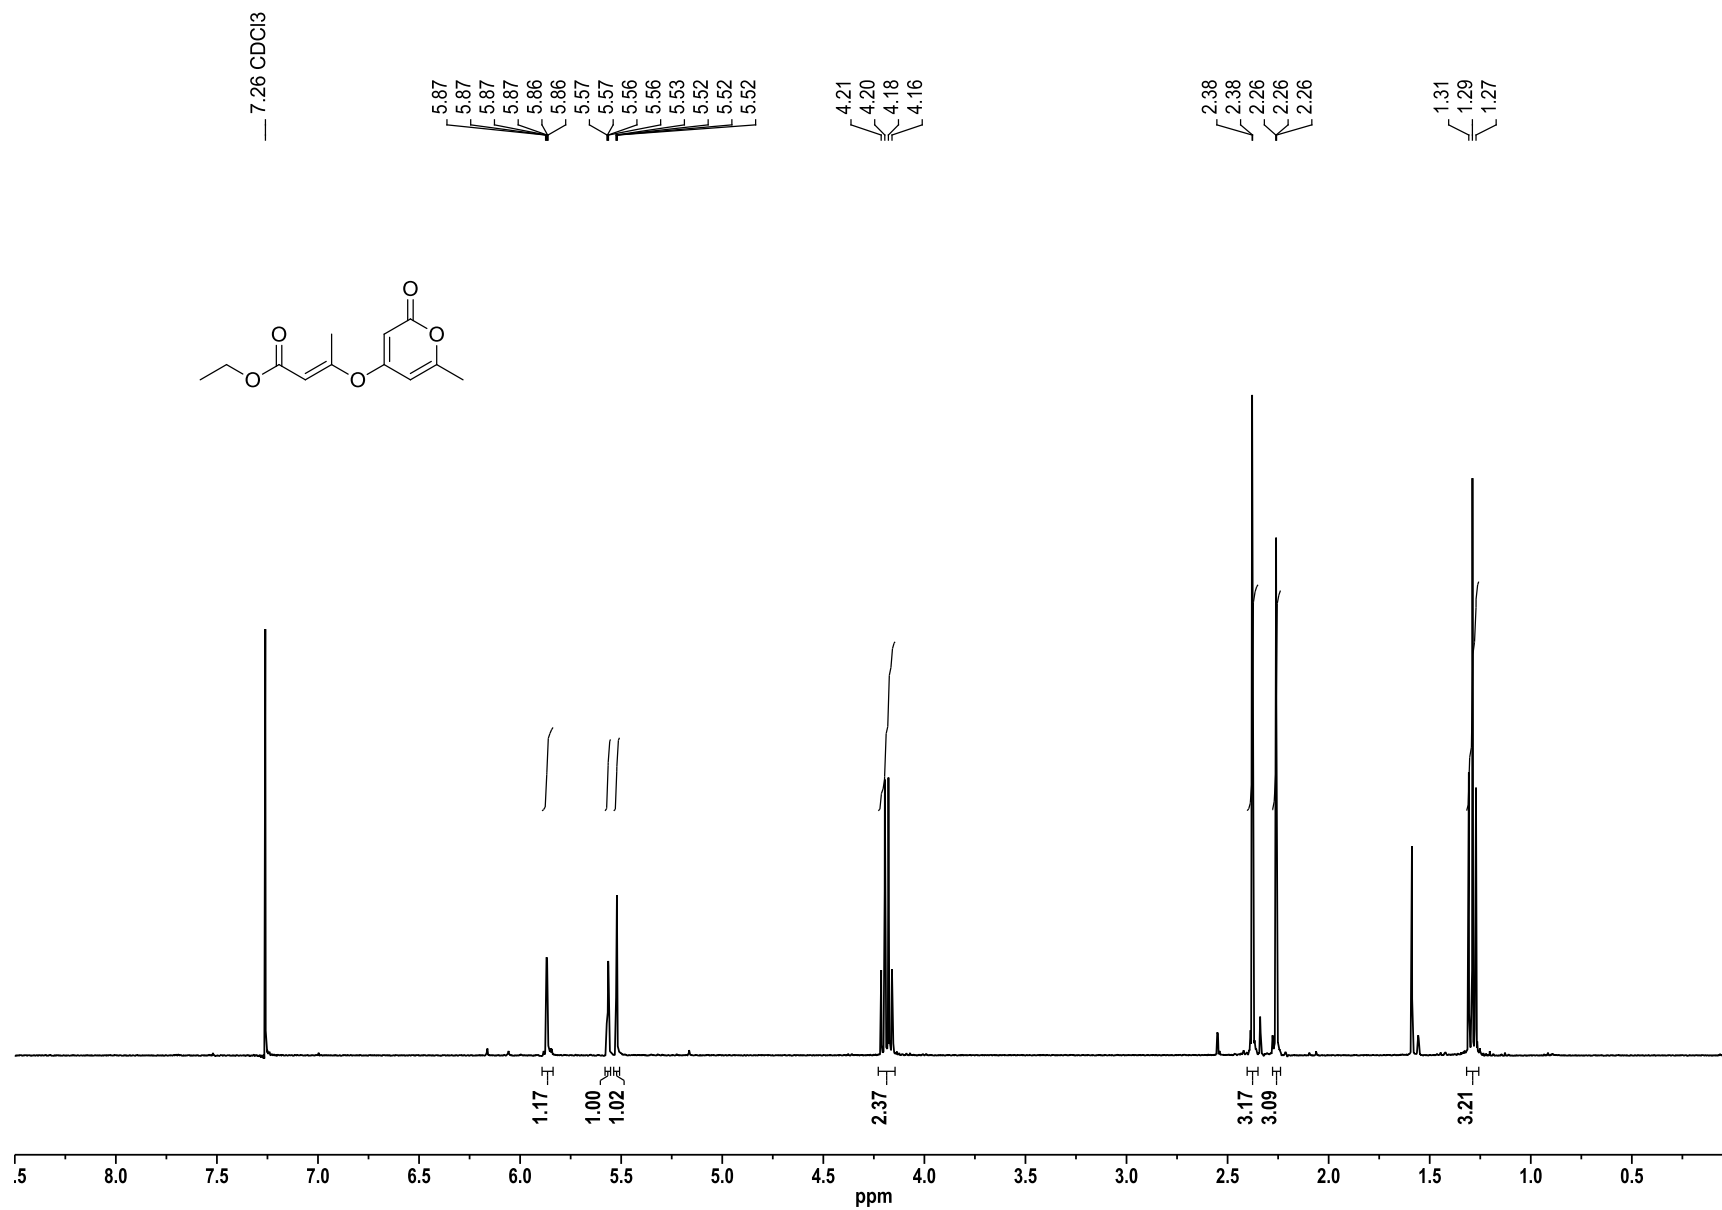

Figure S23 <sup>1</sup>H NMR spectrum of 9.

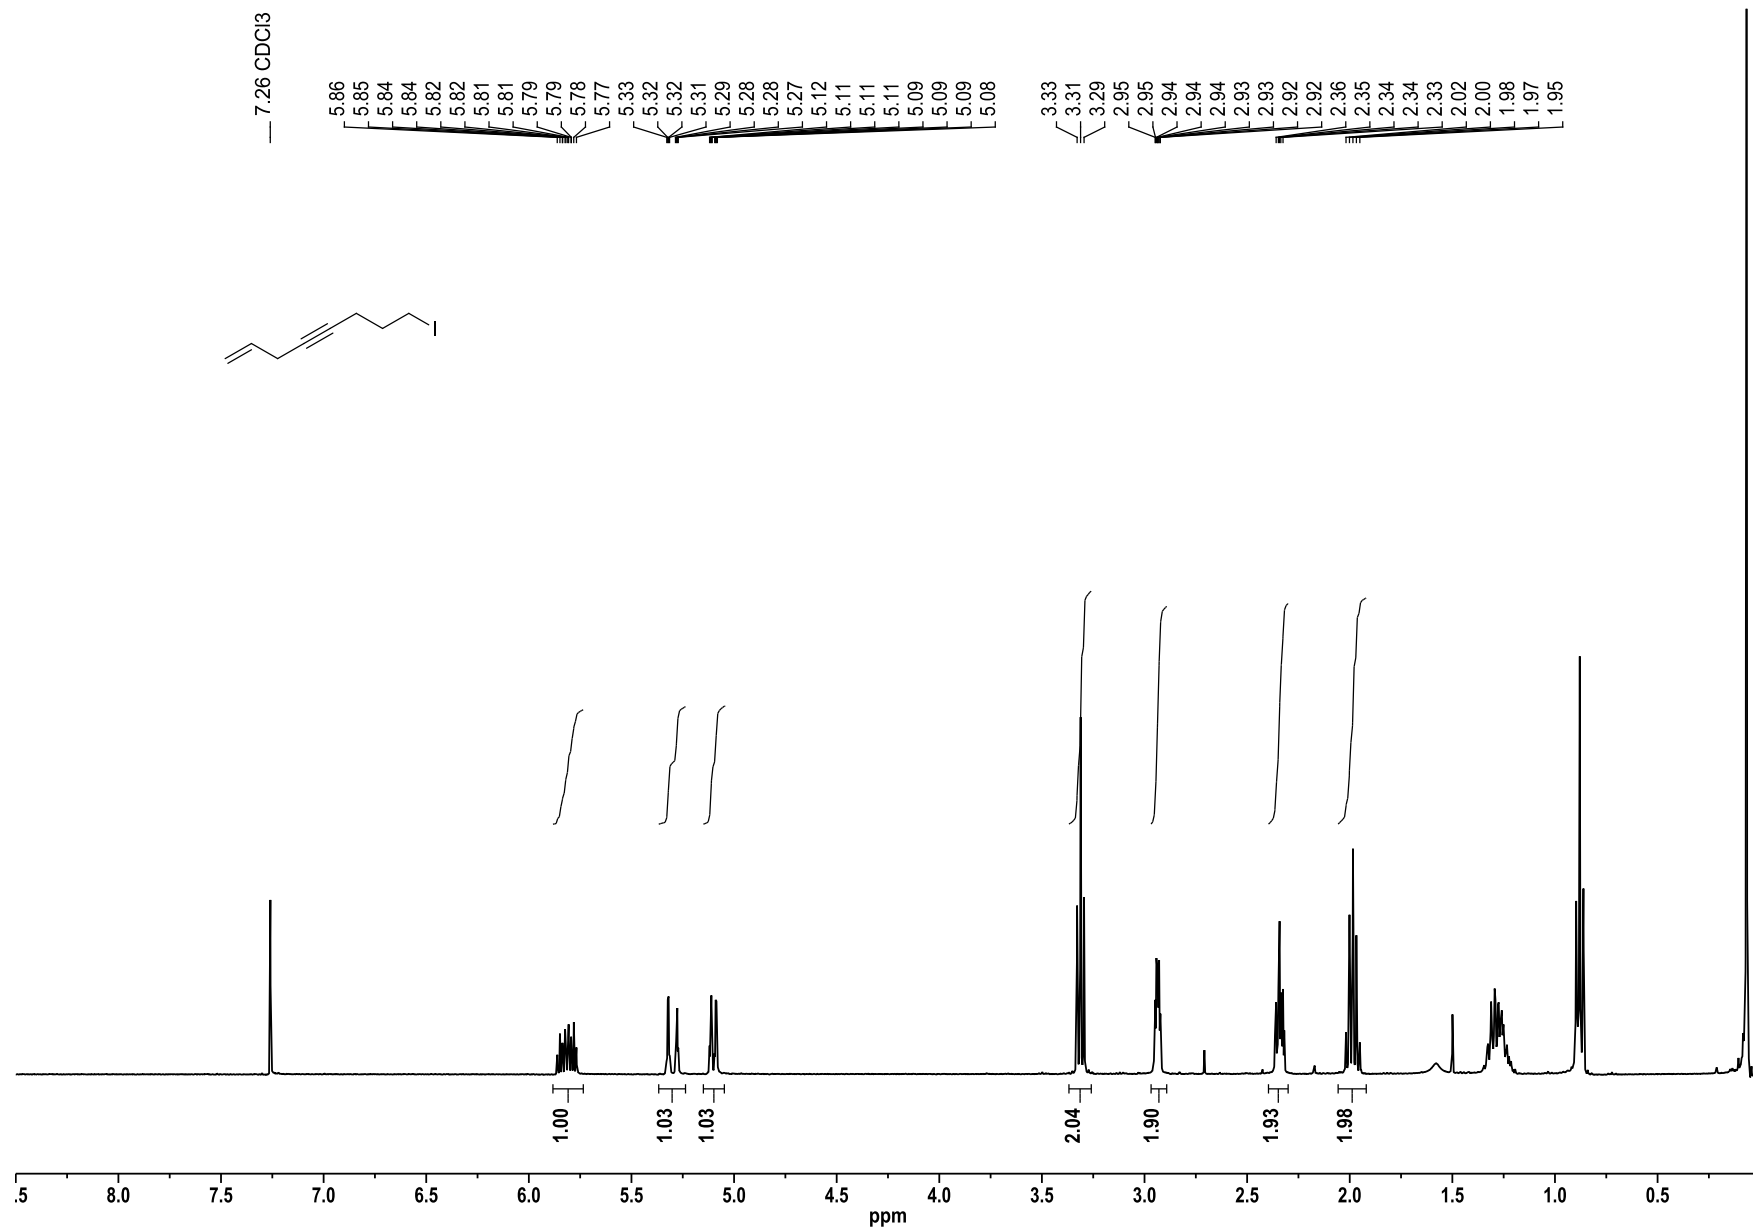

Figure S24 <sup>1</sup>H NMR spectrum of 11.
